# Supplementary material for: Enablers and barriers in upscaling telemonitoring across geographic boundaries: a scoping review
Source: PubMed Central journal article supplement — BMJ Open. 2022 Apr 19;12(4):e057494. doi: 10.1136/bmjopen-2021-057494 (PMC9021767; doi:10.1136/bmjopen-2021-057494), 2022-04-19
Supplement: bmjopen-2021-057494.draft_revisions.pdf [file bmjopen-2021-057494.draft_revisions.pdf]

# BMJ Open

BMJ Open is committed to open peer review. As part of this commitment we make the peer review history of every article we publish publicly available.

When an article is published we post the peer reviewers' comments and the authors' responses online. We also post the versions of the paper that were used during peer review. These are the versions that the peer review comments apply to.

The versions of the paper that follow are the versions that were submitted during the peer review process. They are not the versions of record or the final published versions. They should not be cited or distributed as the published version of this manuscript.

BMJ Open is an open access journal and the full, final, typeset and author-corrected version of record of the manuscript is available on our site with no access controls, subscription charges or pay-per-view fees (<http://bmjopen.bmj.com>).

If you have any questions on BMJ Open's open peer review process please email [info.bmjopen@bmj.com](mailto:info.bmjopen@bmj.com)

# BMJ Open

## Upscaling of telemonitoring across geographic boundaries: a scoping review

|                               |                                                                                                                                                                                                                                                                                                                                                                                                                                                                                                                                                                                                                                                                                                                                               |
|-------------------------------|-----------------------------------------------------------------------------------------------------------------------------------------------------------------------------------------------------------------------------------------------------------------------------------------------------------------------------------------------------------------------------------------------------------------------------------------------------------------------------------------------------------------------------------------------------------------------------------------------------------------------------------------------------------------------------------------------------------------------------------------------|
| Journal:                      | <i>BMJ Open</i>                                                                                                                                                                                                                                                                                                                                                                                                                                                                                                                                                                                                                                                                                                                               |
| Manuscript ID                 | bmjopen-2021-057494                                                                                                                                                                                                                                                                                                                                                                                                                                                                                                                                                                                                                                                                                                                           |
| Article Type:                 | Original research                                                                                                                                                                                                                                                                                                                                                                                                                                                                                                                                                                                                                                                                                                                             |
| Date Submitted by the Author: | 17-Sep-2021                                                                                                                                                                                                                                                                                                                                                                                                                                                                                                                                                                                                                                                                                                                                   |
| Complete List of Authors:     | Gijsbers, Harm; Amsterdam UMC Locatie AMC, Department of Surgery, Amsterdam Gastroenterology and Metabolism; Amsterdam UMC Locatie AMC, Department of Rehabilitation<br>Feenstra, Tim M; Amsterdam UMC Locatie AMC, Department of surgery, Amsterdam Gastroenterology and Metabolism<br>Eminovic, Nina; Amsterdam UMC Locatie AMC, Department of Medical Informatics; Dutch Hospital Association<br>van Dam, Debora; University of Amsterdam, Department of surgery<br>Nurmohamed, S. Azam; Amsterdam UMC Locatie AMC, Department of Internal Medicine (Nephrology)<br>van de Belt, Tom; Radboudumc, Health innovations lab<br>Schijven, Marlies; Amsterdam UMC Locatie AMC, Department of Surgery, Amsterdam Gastroenterology and Metabolism |
| Keywords:                     | Change management < HEALTH SERVICES ADMINISTRATION & MANAGEMENT, Health informatics < BIOTECHNOLOGY & BIOINFORMATICS, Telemedicine < BIOTECHNOLOGY & BIOINFORMATICS                                                                                                                                                                                                                                                                                                                                                                                                                                                                                                                                                                           |
|                               |                                                                                                                                                                                                                                                                                                                                                                                                                                                                                                                                                                                                                                                                                                                                               |

SCHOLARONE™  
Manuscripts

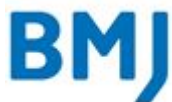

I, the Submitting Author has the right to grant and does grant on behalf of all authors of the Work (as defined in the below author licence), an exclusive licence and/or a non-exclusive licence for contributions from authors who are: i) UK Crown employees; ii) where BMJ has agreed a CC-BY licence shall apply, and/or iii) in accordance with the terms applicable for US Federal Government officers or employees acting as part of their official duties; on a worldwide, perpetual, irrevocable, royalty-free basis to BMJ Publishing Group Ltd ("BMJ") its licensees and where the relevant Journal is co-owned by BMJ to the co-owners of the Journal, to publish the Work in this journal and any other BMJ products and to exploit all rights, as set out in our [licence](#).

The Submitting Author accepts and understands that any supply made under these terms is made by BMJ to the Submitting Author unless you are acting as an employee on behalf of your employer or a postgraduate student of an affiliated institution which is paying any applicable article publishing charge ("APC") for Open Access articles. Where the Submitting Author wishes to make the Work available on an Open Access basis (and intends to pay the relevant APC), the terms of reuse of such Open Access shall be governed by a Creative Commons licence – details of these licences and which [Creative Commons](#) licence will apply to this Work are set out in our licence referred to above.

Other than as permitted in any relevant BMJ Author's Self Archiving Policies, I confirm this Work has not been accepted for publication elsewhere, is not being considered for publication elsewhere and does not duplicate material already published. I confirm all authors consent to publication of this Work and authorise the granting of this licence.

# Upscaling of telemonitoring across geographic boundaries: a scoping review

H.J.H. Gijsbers\*, T.M. Feenstra, N. Eminovic, D. van Dam, S.A. Nurmohamed, T.H. van de Belt, M.P. Schijven

1. H.J.H. Gijsbers, [h.j.gijsbers@amsterdamumc.nl](mailto:h.j.gijsbers@amsterdamumc.nl) Department of surgery, Amsterdam Gastroenterology and Metabolism, Amsterdam UMC, University of Amsterdam, the Netherlands. Department of rehabilitation, Amsterdam UMC, University of Amsterdam, the Netherlands.  
\*corresponding author Amsterdam UMC, loc. AMC PO box 22660, 1100 DD Amsterdam Zuidoost, The Netherlands
2. T.M. Feenstra, [tm.feenstra@amsterdamumc.nl](mailto:tm.feenstra@amsterdamumc.nl) Department of surgery, Amsterdam Gastroenterology and Metabolism, Amsterdam UMC, University of Amsterdam, the Netherlands
3. N. Eminovic, [n.eminovic@gmail.com](mailto:n.eminovic@gmail.com), Department of Medical Informatics, Amsterdam UMC, University of Amsterdam, The Netherlands, Currently working at Dutch Hospital Association, Utrecht, the Netherlands.
4. D. van Dam, [d.vandam@amsterdamumc.nl](mailto:d.vandam@amsterdamumc.nl) Department of surgery, Amsterdam Gastroenterology and Metabolism, Amsterdam UMC, University of Amsterdam, the Netherlands
5. S.A. Nurmohamed, [sa.nurmohamed@amsterdamumc.nl](mailto:sa.nurmohamed@amsterdamumc.nl), Department of Internal Medicine (Nephrology), Amsterdam UMC, the Netherlands
6. T.H. van de Belt, [Tom.vandeBelt@radboudumc.nl](mailto:Tom.vandeBelt@radboudumc.nl), Health Innovation Labs, Radboudumc, the Netherlands.
7. M.P. Schijven, [m.p.schijven@amsterdamumc.nl](mailto:m.p.schijven@amsterdamumc.nl), Department of surgery, Amsterdam Gastroenterology and Metabolism, Amsterdam UMC, University of Amsterdam, the Netherlands

**#title: 9**

**#words abstract: 292**

**#words body: 3457**

**#figures: 2**

**#tables: 5**

**#appendix: 3**

1  
2  
3 #words references: 1459  
4

## 5 **Abstract**

6  
7 **Introduction and objective:** Telemonitoring is strategy to digitally monitor a person's vital functions  
8 and /or physiological data at a distance using technology. Whilst pilot studies on the proposed  
9 benefits of telemonitoring show promising results, it appears challenging to implement  
10 telemonitoring on a larger scale. The aim of this scoping review is to identify the barriers and  
11 enablers for upscaling of telemonitoring across different settings and geographical boundaries in  
12 healthcare.  
13  
14

15  
16  
17 **Methods:** PubMed, EMBASE, Cinahl, Web of Science and IEEE databases were searched and  
18 outcome was assessed by two independent reviewers. Using scoping review methodology, selected  
19 studies were systematically assessed on their factors of influence on upscaling of telemonitoring.  
20  
21

22 **Results:** A total of 1938 titles and abstracts were screened and 19 articles were included for final  
23 analysis. This analysis revealed 89 relevant factors of influence: 18 were reported as barrier, 26 were  
24 reported as enabler and 45 factors were reported being both barrier and enabler for upscaling  
25 telemonitoring. The actual utilisation of telemonitoring varied widely across studies. The most  
26 frequently mentioned factors of influence are: resources, like costs or reimbursement; access or  
27 interface with electronic medical record and knowledge of frontline staff.  
28  
29

30  
31  
32 **Conclusion:** Successful scaling up of telemonitoring requires insight into critical success factors,  
33 especially at an overarching national level. To futureproof and facilitate upscaling of telemonitoring it  
34 is recommended to find means for reimbursement to use this type of technology in usual care, and  
35 to explore alternative payment models. A wide program on change management, national or  
36 regional coordinated, is key. Clear regulatory conditions and professional guidelines may further  
37 facilitate widespread adoption and use of telemonitoring. Future research should focus on  
38 converting the 'barriers and enablers' as identified by this review into a useful tool or guideline  
39 supporting further nationwide upscaling of telemonitoring.  
40  
41  
42  
43  
44  
45  
46

47 **Keywords:** Telemonitoring, Scoping Review, Upscaling, Implementation, remote health monitoring  
48  
49  
50  
51  
52  
53  
54  
55  
56  
57  
58  
59  
60

## Article summary – strengths and limitations

- This scoping review used a transparent methodological approach supported by the application of an established methodological framework.
- Narrowing down the definition of telemonitoring in the search is an important strength of study.
- The use of Mendel’s framework, which provided to be fit for categorizing the scoping review results on upscaling of telemonitoring across the included studies, is another strength of this study.
- A second reviewer encoded a purposeful sample of all extracted text components, however, no significant differences were identified between the first and second reviewer.

## Introduction

Telemonitoring is the collection, transmission, evaluation, and communication of individual health data from a patient to their healthcare provider or extended care team from outside a hospital or clinical office (i.e., the patient's home) using personal health technologies including wireless devices, wearable sensors, implanted health monitors, smartphones and mobile apps.<sup>1</sup> Pilot studies show that telemonitoring supports self-management, for instance by offering direct feedback to the patient. Furthermore, telemonitoring improves (early) detection of disease or clinical deterioration and thereby has the potential to reduce hospitalisation and mortality.<sup>2 3 4</sup> In addition, telemonitoring has the potential to monitor patients more frequently. As such, telemonitoring could improve quality of care, reduce the amount of time a clinician ends up spending to manage patients and increases the frequency of monitoring without increasing workload on healthcare resources.<sup>5-8</sup> Devices with intelligent and reliable computing sensors in wearables, hand-held devices, (smart)phones and implants have become widely available. The World Health Organisation (WHO), the European Union (EU), national governments and other governing organisations promote use of such technology if proven to be valid, reliable and sustainable, attempting to facilitate care at a distance.<sup>9-11</sup> However, positive results from the aforementioned small pilot studies are difficult to replicate when telemonitoring initiatives are to be implemented on a larger scale.<sup>12 13</sup>

In this review, following the WHO definition, 'upscaling' of telemonitoring is defined as the expansion and replication of good practice of a telemonitoring project in more than one independent organisation or setting and across geographical boundaries.<sup>14</sup>

In order to facilitate larger scale implementation of telemonitoring projects using personal health technologies, evidence is needed regarding the barriers and enablers for successful implementation. A preliminary literature search conducted on January 6 2020 in PubMed, JBI Evidence Synthesis, Open Science Framework registries and the PROSPERO database identified that to that moment, no systematic reviews, meta-analyses, or scoping reviews on scaling up telemonitoring have been performed and that none were underway. (Appendix 1) . Research in the field of telemonitoring is relatively new and lacks high quality and homogeneous studies on the scaling up of telemonitoring. The purpose is to identify factors of influence on scaling up. Therefore it was decided to perform a scoping review.<sup>15</sup> Scoping reviews are a form of knowledge synthesis that incorporate a range of study designs in order to provide a comprehensively summary.<sup>16</sup>

1  
2  
3 The aim of this scoping review is to identify current barriers of and enablers for upscaling  
4 telemonitoring across different settings in a structured manner.  
5  
6  
7

## 8 **Methods**

9

10 This scoping review was conducted in accordance with the JBI methodology guidance for scoping  
11 reviews, using the Preferred Reporting Items for Systematic Reviews and Meta-Analyses – Scoping  
12 Reviews (PRISMA-ScR) checklist, which is an extension of the PRISMA checklist.<sup>17 18</sup> The scoping  
13 review protocol was registered on March 29<sup>th</sup> 2021, via the Open Science Framework  
14 (<https://osf.io/mpq9g/>)  
15  
16  
17  
18

### 19 **Patient and public involvement**

20 Patients and/or the public were not directly involved in this study.  
21  
22  
23  
24

### 25 **Eligibility criteria**

26 Studies were eligible if they focussed on remote monitoring of patients' vital functions - such as  
27 blood pressure, pulse oximetry, temperature and heart rate - by care practitioners and /or centres,  
28 and the monitored data was transmitted digitally via (smart)phone and/or Internet. Studies had to  
29 describe the implementation or adoption of telemonitoring on a larger scale, that is; in more than  
30 one organisation, or in a larger geographical area (larger regions, province or nation-wide). There  
31 were no restrictions on publication year and study design and only full-text publications were  
32 included.  
33  
34  
35  
36  
37  
38

39 Studies were restricted to the English language. Ongoing studies, conference abstracts and posters  
40 were excluded, as were studies reporting self-monitoring by patients only, and studies that solely  
41 described the effect of telemonitoring but not the implementation or adoption.  
42  
43  
44  
45  
46

### 47 **Search strategy for Scoping Review**

48 The preliminary search identified appropriate keywords and MeSH-terms. Subsequently, a broad  
49 search strategy for Pubmed was formulated by three reviewers (HG, NE, MS) and a medical librarian,  
50 combining the identified keywords and MeSH-terms related to telemedicine, ehealth,  
51 (tele)monitoring, implementation and upscaling. No filters were applied in the final search strategy.  
52 The complete PubMed search strategy is outlined in Appendix 2 and was adapted for the other  
53 indexed databases. HG performed the literature search of PubMed, EMBASE, Cinahl, Web of Science  
54  
55  
56  
57  
58  
59  
60



1  
2  
3 and IEEE in January 2020 and updated the search on July 1<sup>st</sup> 2021. Included studies were cross-  
4 referenced to identify additional studies.  
5  
6  
7

### 8 **Data Extraction and Analysis**

9  
10 One reviewer (HG) removed duplicates and led the process of study screening and selection. Study  
11 selection was managed using the online reference manager Rayyan.<sup>19</sup> The search results were  
12 reviewed on two sequential levels. In the initial “title and abstract stage”, the article titles and  
13 abstracts were screened according to the inclusion and exclusion criteria by two researcher (HG and  
14 TF). The lists of included studies and summaries of the collected data constructed by the two  
15 researchers were compared. Any disagreements were resolved by discussion and involvement of a  
16 third researcher (DvD). In the second “full-text stage”, the remaining articles were examined to  
17 ensure that they met the inclusion criteria.  
18  
19  
20  
21  
22  
23

24  
25 Study characteristics were systematically extracted using a structured data collection form that  
26 included the following parameters: type of telemonitoring, study location, year of publication,  
27 (research)methods, patient characteristics, and outcome measures of adoption. The charted data  
28 was verified by a second reviewer (TF or DD).  
29  
30  
31  
32

### 33 **Interpretation and analysis using Mendel’s framework**

34  
35 In addition to the extraction of study characteristics, text components from the included articles,  
36 relevant to the nationwide implementation of telemonitoring, were extracted by one of the  
37 researchers (HG). The extracted text components were uploaded into a qualitative analysis software  
38 program (MAXQDA Analytics Pro, VERBI Software, 2020), and coded to capture all relevant  
39 constructs. A second researcher encoded independently of the first researcher 25% of the articles,  
40 after which they verified their coding. If there were significant differences between the first and  
41 second researcher, the differences were discussed and the procedure repeated.  
42  
43  
44  
45  
46  
47

48  
49 The structure of the analysis was based on Mendel’s framework for Building Evidence on  
50 Dissemination and Implementation in Health Services Research<sup>20</sup> (appendix 3). This framework  
51 supports the understanding and assessing of relevant contextual factors and dynamics affecting the  
52 dissemination, implementation, and sustainability of interventions within communities and  
53 healthcare settings. In this scoping review, the “diffusion process” items of Mendel’s framework  
54 were used to better understand and generalise the relevant contextual factors from different studies  
55 involved with (nation)wide upscaling of telemonitoring.  
56  
57  
58  
59  
60

1  
2  
3  
4  
5  
6  
7  
8  
9  
10  
11  
12  
13  
14  
15  
16  
17  
18  
19  
20  
21  
22  
23  
24  
25  
26  
27  
28  
29  
30  
31  
32  
33  
34  
35  
36  
37  
38  
39  
40  
41  
42  
43  
44  
45  
46  
47  
48  
49  
50  
51  
52  
53  
54  
55  
56  
57  
58  
59  
60

For peer review only

## Results

The search retrieved 2582 records. After the removal of duplicates, 1986 titles and abstracts were screened for inclusion and exclusion. 1938 studies were excluded after title and abstract screening, leaving 48 articles for full-text screening. All numbers were used to create a flowchart (Figure 1). Additional details for the reasons of exclusion are presented in Table 1. Finally, a total of 19 articles were included for analysis, describing a variety of telemonitoring solutions.<sup>21-38</sup>

### Characteristics of studies

The general characteristics of the included studies are presented in Table 2. Eleven out of 19 articles described a survey<sup>21 22 25 28-30 33 34 36-38</sup>, four described focus group interviews<sup>27 31 35 39</sup>, three articles were narrative reviews<sup>24 26 32</sup>, and one article described the results of a workshop.<sup>40</sup> A total of 89 factors – barriers and/or enablers – were mentioned 202 times in 19 studies.

### Scale and utilisation of telemonitoring

The utilisation of telemonitoring was reported in 13 of the 19 studies. Reported utilisation varied widely from “not part of routine care / not available as standard care” in Austria, Norway, Lithuania, the UK and Sweden, to “90% utilisation of tele-electrocardiography” in Brasil.<sup>21 22 28 33 35</sup>

There was significant heterogeneity of the definition of utilisation, which was reported as: number of patients that used telemonitoring<sup>32 36 37 39</sup>, percentages of actual use<sup>29</sup>, number of clinics that are engaged in telemonitoring<sup>24 36 37</sup>, number of hospitals offering telemonitoring for high-risk pregnancies<sup>38</sup>, number of projects in a country<sup>30</sup>, and total recorded measurements.<sup>37</sup>

The percentages of the actual use of telemonitoring in patients with heart failure varied from 3% to 77%.<sup>25 29 37</sup> In Brasil, a telemonitoring system for the monitoring of heart rhythms with an electrocardiogram was implemented in 79 municipalities. This study showed a utilisation ratio higher than 90%.<sup>22</sup> In Denmark, all telemedicine projects are mapped to provide a national contemporary overview of telemedicine initiatives. Kristensen, *et al.* reported utilisation by referring to a website on which 16 active telemonitoring projects are registered within the country at this moment.<sup>30 41</sup> The barriers and enablers for nationwide upscaling of telemonitoring were structured in three domains using Mendel’s framework: context of diffusion, stages of diffusion and intervention outcomes.

Figure 1 PRISMA flowchart showing the process of including and excluding studies.

**Search syntax:**

("Telemedicine"[Mesh] OR telemedicine[tiab] OR mhealth[tiab] OR m-health[tiab] OR ehealth[tiab] OR e-health[tiab] OR out-of-office[tiab])  
 AND  
 ("Monitoring, Physiologic"[Mesh] OR "Monitoring, Ambulatory"[Mesh] OR monitor\*[tiab] OR telemonitor\*[tiab] OR health care[tiab] OR healthcare[tiab])  
 AND  
 ("Implementation Science"[Mesh] OR "Health Plan Implementation"[Mesh])  
 AND  
 scale up[tiab] OR implement\*[tiab] OR adoption[tiab])  
 AND  
 ("Health Policy"[Mesh] OR "Policy Making"[Mesh] OR "National Health Program "[Mesh] OR policy[tiab] OR survey\*[tiab] OR mapping[tiab])

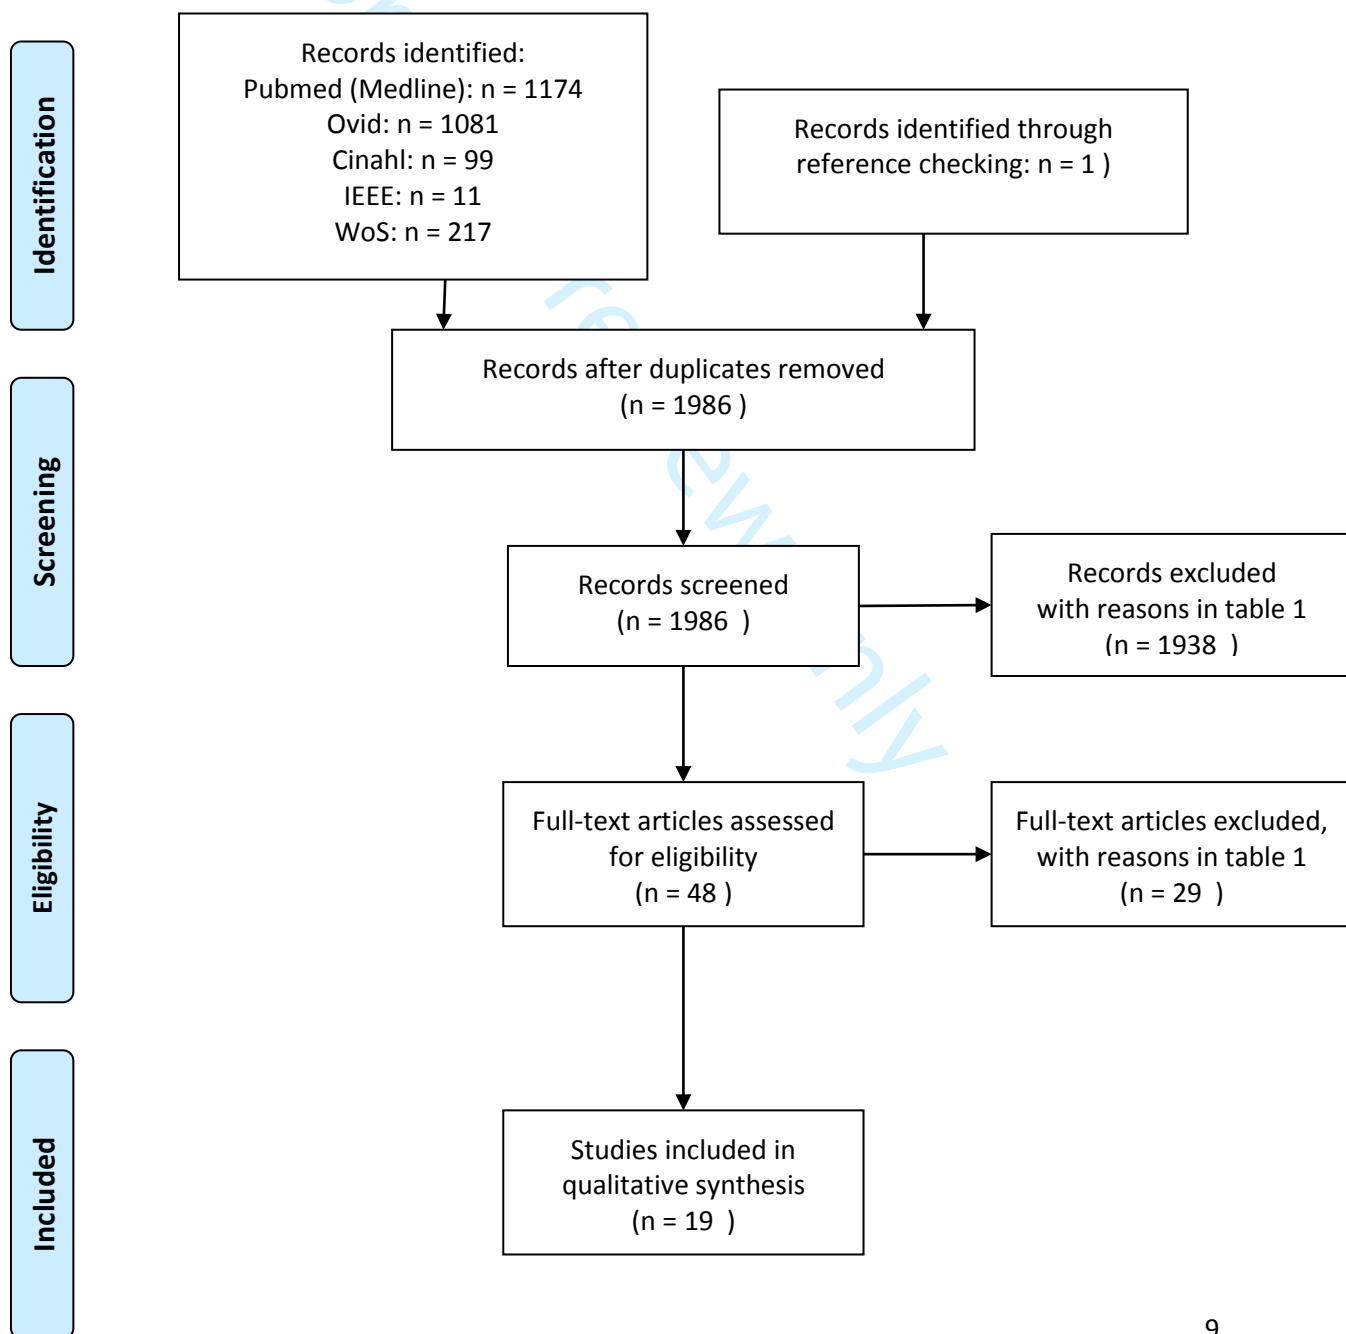

### What are the barriers and enablers for upscaling of telemonitoring?

Regarding the context of diffusion, the barriers and enablers retrieved were classified into six different categories of contextual factors: being a barrier, an enabler, or both according to Mendel's framework (Figure 2). Table 3 gives an overview of factors, table 4 describes barriers and/or enablers in more detail.

#### Number of factors that influence upscaling

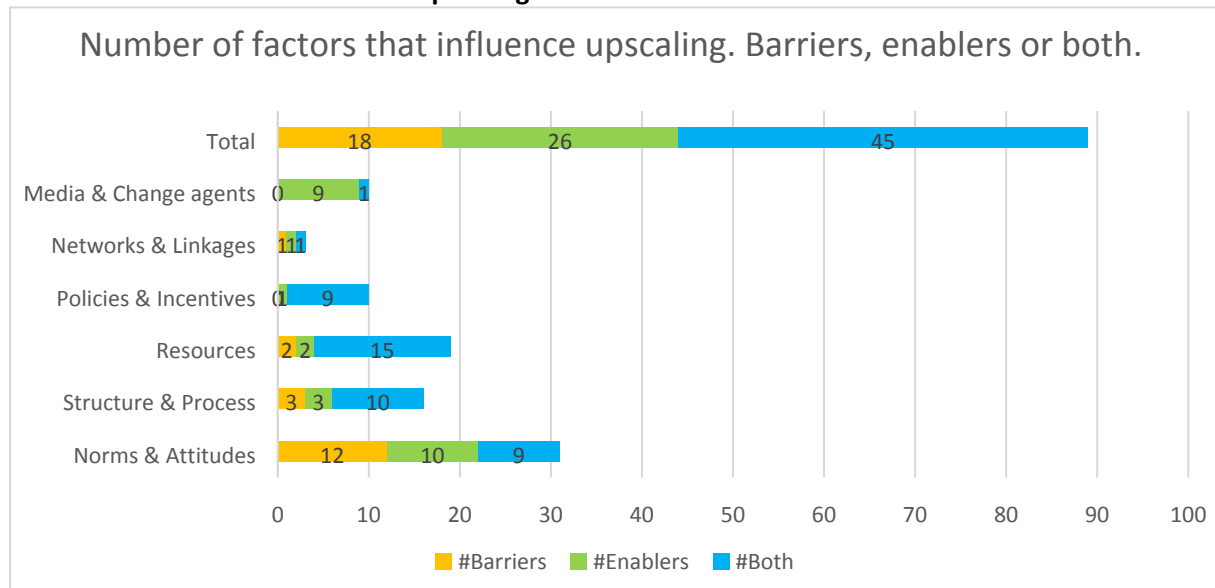

Figure 2. The number of barriers, enablers or both regarding the context of diffusion according to Mendel's framework.

#### 1. Norms & Attitudes.

Primary physicians needed to adapt their standard procedures in order to make an efficient contribution to care using telemonitoring solutions, for example by using the patients' self-measurements instead of doctor's office in-house measurements.<sup>27</sup> A common perceived barrier of professionals is that telehealth can increase workload and make planning work more difficult when responding to monitoring alerts.<sup>35</sup> Across different studies professionals shared the view that patients may become too dependent on the technology making it a clear barrier for the use of telemonitoring.<sup>27 31</sup> Some studies report scepticism or reservations concerning telemonitoring.<sup>21 31 35</sup> Another important barrier for the diffusion of telemonitoring is the lack of awareness of the possibilities and opportunities for providing care using remote monitoring among both health care management and clinical staff.<sup>40</sup>

1  
2  
3 Healthcare professionals or centres who have such awareness generally have a more positive  
4 attitude regarding telemonitoring.<sup>29 31 37</sup> In two studies, healthcare professionals had high  
5 expectations of working with telemonitoring, as well as managing caseloads more efficiently.<sup>35 36</sup>  
6  
7  
8  
9

## 10 2. Organisational Structure & Process.

11 Eleven studies reported on organisational items.<sup>21 24-28 32 35-37 40</sup> Adoption of telemonitoring requires  
12 an infrastructural investment that will take several years to implement and will involve a complete  
13 overhaul of existing practice, clinically, financially, and managerially.<sup>40</sup> An elaborate program of  
14 change management is described as an enabler in the upscaling and implementation of  
15 telemonitoring.<sup>24 40</sup> Change management is described as continuous evaluation and assessment in  
16 the refining of patient selection criteria for remote monitoring, and personalising care pathways.<sup>24</sup>  
17 Security and privacy aspects influence implementation.<sup>21 24 28 32 37</sup> Setting up appropriate vendor  
18 agreements and protocols is described as an enabler concerning responsibility for incoming data.<sup>21 24</sup>  
19  
20  
21  
22  
23  
24  
25  
26  
27  
28  
29

28 35 36 40

## 30 3. Resources.

31 Financial aspects of telemonitoring are described as an important factor in nine studies.<sup>21 24-26 28 35-37 40</sup>  
32 For example, Faber *et al.* described: a lack of financial resources is among the four most important  
33 barriers for the adoption of eHealth.<sup>25</sup> Six studies described reimbursement as a barrier for  
34 implementation of telemonitoring.<sup>21 24 26 28 33 40</sup> According to these studies a suitable reimbursement  
35 solution should be adopted to incentivise and engage all stakeholders and to drive the intended  
36 transformation of healthcare delivery. Along with the financial aspects, concern rises for the possible  
37 inability to access the telemonitoring system via the electronic medical records.<sup>27 32 35 37 40</sup> Also, a lack  
38 of interoperability generates new tasks to share telehealth data with other clinicians via electronic  
39 patient records. This also causes concerns whether the telehealth data entered in a patient's record  
40 are accurate and relevant. This makes interoperability standards crucial to the success of upscaling  
41 remote patient monitoring programs.<sup>32 40</sup>  
42  
43  
44  
45  
46  
47  
48  
49

## 50 4. Policies & Incentives.

51 Three studies indicate that policies governing telehealth may differ at the state level, which forms a  
52 barrier for implementation on interstate level.<sup>26 35 40</sup> On a national level, professional societies can  
53 issue guidelines to enable telemonitoring.<sup>22 24</sup> European and worldwide policies on innovation  
54 friendly, legal and regulatory frameworks may enable upscaling of telemonitoring.<sup>24 26 40</sup>  
55  
56  
57  
58  
59  
60

## 5. Networks & Linkages.

1  
2  
3 Four studies described non-profit or public-private collaborations as enablers for implementation of  
4 telemonitoring.<sup>24 26 28 32</sup> Chronaki et al., for example, described a role for professional organisations  
5 like the European Society of Cardiology (ESC) in collaboration with national societies in catalysing  
6 reimbursement and adoption of telemonitoring in cardiac diseases.<sup>24</sup> A national repository could act  
7 as the first port of call where policy makers, clinicians, and users could access information of remote  
8 monitoring projects.<sup>40</sup> Another approach could be an extended partnership between device  
9 companies and health care systems involving telemonitoring services.<sup>26</sup>

10 At a regional level, collaborative efforts may connect hospital and regional health executives to  
11 network leaders, focusing on adoption, scale, and spread of network monitoring solutions.

12 Collaboration between hospitals and primary care providers, within the Ontario Telemedicine  
13 Network, proved to be an important factor for the sustainability of a tele homecare program in  
14 Canada.<sup>28 32</sup>

#### 25 6. *Media & Change Agents.*

26 Two studies described media and change agents as enablers for the implementation of  
27 telemonitoring. Advocates, early adopters and local champions are described as an important source  
28 of information and advice for the introduction of telemonitoring.<sup>24 35 37</sup>

#### 33 **Stages of diffusion**

34 Barriers or enablers were reported not to be linked to an implementation stage nor to a specific  
35 stage of diffusion. However, based on the reported utilisation and phase of upscaling, it is possible to  
36 analyse what stage of diffusion a telemonitoring project is most likely to be in. Eight studies  
37 described telemonitoring in the stage of (pre)adoption.<sup>21 25-28 33 35 36</sup> Six studies described  
38 telemonitoring in the implementation stage.<sup>24 31 32 37 39</sup> Only two studies described telemonitoring  
39 (projects) in the phase of sustainment.<sup>22 32</sup> In three studies it was not possible to analyse the stage of  
40 diffusion.

#### 48 **Intervention outcomes**

49 Barriers and enablers for implementation may affect outcomes for individuals in the community, as  
50 well as local organisations and systems of care. All the (expected) outcomes for implementation of  
51 telemonitoring are described in table 5.

1  
2  
3 *Patient Care & Health Outcomes.* Six studies reported outcomes on an individual level and in what  
4 way they were (expected to be) affected by telemonitoring. For example, implementation of  
5 telemonitoring was expected to improve self-care or patient empowerment.<sup>21 24 27 28 36 40</sup>  
6  
7  
8  
9

### 10 11 12 *Organisation & System Outcomes.*

13  
14 Five studies reported on the (expected) outcomes on an organisational and system level. For  
15 example, when telemonitoring was implemented, it was expected that more patients can be treated  
16 (reducing admission and visits)<sup>21 24 28 33 40</sup>, workload would be reduced<sup>21 28 33</sup>, and costs were  
17 reduced.<sup>21 24 28</sup>  
18  
19  
20

### 21 22 **Discussion**

23  
24 This scoping review provides insight into the barriers and enablers that affect upscaling of  
25 telemonitoring in healthcare across different settings. All included studies examined large scale  
26 adoption or implementation of telemonitoring. One study described an international - European -  
27 scale up.<sup>37</sup> This review retrieves and identifies important overarching factors, relevant for nationwide  
28 upscaling.  
29  
30  
31

32  
33  
34 One of the most frequently mentioned factors of influence is “costs” or “reimbursement”. For  
35 example; Gawalko et al. described the providing of eHealth infrastructure for free throughout the  
36 project duration to be a great enabler.<sup>37</sup> Chronaki et al. mentioned reimbursement as a solution: “a  
37 suitable reimbursement solution should be adopted”.<sup>24</sup> Diaz-Skeete et al. mentioned reimbursement  
38 as the barrier: “there is no financial backing to adopt new systems such as remote monitoring”.<sup>40</sup>  
39 Economic evaluations of eHealth applications are gaining momentum, and studies have shown  
40 considerable variation regarding the costs and benefits that they include.<sup>42</sup> Economic studies on  
41 telemonitoring in heart failure and women at risk of preeclampsia describe this duality. The initial  
42 cost of the telemonitoring equipment may be an obstacle to widespread use of telemonitoring.  
43 Although telemonitoring will require an initial financial investment, economic studies show  
44 substantially reduction of costs in the long term.<sup>43 44</sup> Costs, as a factor of influence, exist in coherence  
45 of “(a lack of) evidence”. In the absence of solid empirical evidence, key decision makers may doubt  
46 the effectiveness of eHealth, which, in turn, limits investment and its long-term integration into the  
47 mainstream health care system.<sup>45</sup> Exploring alternative payment models, for example “temporary”  
48 funding of telemonitoring by health insurers, could bridge that gap so that the necessary evidence  
49 can be collected.  
50  
51  
52  
53  
54  
55  
56  
57  
58  
59  
60



1  
2  
3  
4  
5 Over half of the factors identified are stated both as a barrier and enabler. Therefore, factors of  
6 influence found in this scoping review can be used pragmatic; e.g. as a directive to check whether  
7 the factor is a barrier or an enabler in projects where upscaling is required. A relatively large number  
8 of factors are related to the “norms & attitudes” of users. Although this is an important factor for  
9 local implementation, one would expect that proportionately more context-related factors for  
10 nationwide scaling up would be found. Resources, attitudes, intrinsic motivation and behaviour of  
11 end-users, costs and technical knowledge of health care providers are all important factors of  
12 influence. These findings are consistent with reviews on implementation of other types of eHealth or  
13 telemedicine.<sup>13 46-49</sup>

20  
21 The utilisation and upscaling of telemonitoring varied widely across settings and was not reported in  
22 30% of the included studies. Because adoption is not clearly defined in the studies it is not possible to  
23 interpret the enablers and barriers for each phase of adoption. In future studies, it is recommended  
24 to give a clear definition of adoption and to report utilisation. Only then is it possible to learn more  
25 about barriers and facilitators in various stages of implementation to scale up.

30  
31 Studies in this scoping review reported (expected) “patient care & health outcomes”. Outcomes were  
32 not correlated to certain barriers or enablers. Based on this scoping review it’s not possible to draw  
33 conclusions which factors of upscaling influence the outcomes of care, nor which outcomes of care  
34 influence the upscaling.

#### 39 40 *Practical implications*

41 Based on the findings in this study, a coordinated and structured collaborative approach enables the  
42 upscaling of telemonitoring, embodying:

43 A wide program on change management, including policies and protocols on adaption of healthcare  
44 processes; Implementation coordinators, who set up requirement specifications with particular  
45 attention to interoperability standards, telemonitoring access to electronic medical records, security  
46 and privacy aspects, and appropriate vendor agreements; Widespread marketing and recruitment  
47 initiatives, for example social media channels that enable the recruitment of participating centres;  
48 Collaboration among different hospitals and between primary care and hospitals, as a way to  
49 overcome organisational and regional differences and to create an economy of scale, and;  
50 New and innovative ways for reimbursement.

1  
2  
3 Narrowing down the definition of telemonitoring in the search is an important strength of study. A  
4 range of terms like “remote monitoring”, “teleconsultation”, “telehealth” or “telecare” is used  
5 interchangeably in the definition of telemonitoring. There are 23 different exclusion reasons for 1688  
6 exclusions due to the terminology of telemonitoring. (Table 1). For example; teleconsultation, video-  
7 consultation and remote monitoring by telephone calls are all described as telemonitoring and 314  
8 studies used “telemonitoring” as a keyword for a mobile health application without telemonitoring  
9 functionality. Using this precise definition of telemonitoring makes it possible to compare the results  
10 of this study with future studies on upscaling telemonitoring. Another strength of this study is the  
11 use of Mendel’s framework, which provided to be fit for categorizing the scoping review results on  
12 upscaling of telemonitoring across the included studies.  
13  
14  
15  
16  
17  
18  
19  
20

21 This review analysed search results from four well-known research databases. It uses key terms  
22 registered with MeSH, and multiple reviewers determined the inclusion and exclusion criteria. A  
23 limitation to this study could be the coding of extracted text components by the second reviewer,  
24 who coded only a purposeful sample of all studies. However, no significant differences were  
25 identified between the first and second reviewer, hence is therefore unlikely that this resulted in  
26 bias.  
27  
28  
29  
30  
31  
32

33 Due to the large amount of heterogeneity in the included studies with regard to study design, types  
34 of telemonitoring, and measurement of adoption or utilisation, advices on how to scale up a  
35 telemonitoring project within countries have to be made carefully. For future research it is desirable  
36 to use a clear and narrow definition of telemonitoring, utilisation and outcome measures.  
37  
38  
39  
40

#### 41 **Conclusion and recommendations**

42 We live in a world where telemonitoring rapidly integrates into preventive and clinical care.  
43 Successful scaling up of telemonitoring requires insight into factors of influence in adoption,  
44 especially at an overarching national level. To futureproof and facilitate upscaling of telemonitoring it  
45 is recommended to find means for reimbursement to use this type of technology in usual care, and  
46 to explore alternative payment models early-on. A wide program on change management, national  
47 or regional coordinated, is key. Clear regulatory conditions and professional guidelines may further  
48 facilitate widespread adoption and use of telemonitoring. The results of this study can be used to  
49 help develop a guideline for upscaling.  
50  
51  
52  
53  
54  
55  
56  
57  
58  
59  
60

1  
2  
3 **Acknowledgements** The authors wish to thank Ms. F.S. van Etten-Jamaludin, clinical librarian at the  
4 research support department of Amsterdam UMC, for her support searching the databases.  
5  
6

7 **Contributors** HG, NE, DvD and MS were involved with the design of the work. HG and TF did the  
8 screening of titles and abstracts to include studies. HG, TF and DvD extracted study characteristics.  
9 HG and DvD encode extracted text components. HG, TF, NE, DvD and MS prepared the original draft  
10 of the paper. SN, TvdB and MS contributed to the refinement of the paper. All authors have read and  
11 approved the final paper and agree to be accountable for all aspects of the work.  
12  
13  
14  
15  
16

17 **Funding** The authors have not declared a specific grant for this research from any funding agency in  
18 the public, commercial or not-for-profit sectors.  
19  
20  
21

22 **Competing interests** None declared.  
23  
24

25 **Patient consent for publication** Not required.  
26  
27

28 **Provenance and peer review** Not commissioned; externally peer reviewed.  
29  
30  
31  
32  
33  
34  
35  
36  
37  
38  
39  
40  
41  
42  
43  
44  
45  
46  
47  
48  
49  
50  
51  
52  
53  
54  
55  
56  
57  
58  
59  
60

## References

1. ATA. ATA Telehealth: Defining 21st Century Care: American Telemedicine Association, 2020.
2. Farias FAC, Dagostini CM, Bicca YA, et al. Remote Patient Monitoring: A Systematic Review. *Telemed J E Health* 2019 doi: 10.1089/tmj.2019.0066 [published Online First: 2019/07/18]
3. Bashi N, Karunanithi M, Fatehi F, et al. Remote Monitoring of Patients With Heart Failure: An Overview of Systematic Reviews. *J Med Internet Res* 2017;19(1):e18. doi: 10.2196/jmir.6571 [published Online First: 2017/01/22]
4. Kitsiou S, Pare G, Jaana M. Effects of home telemonitoring interventions on patients with chronic heart failure: an overview of systematic reviews. *J Med Internet Res* 2015;17(3):e63. doi: 10.2196/jmir.4174 [published Online First: 2015/03/15]
5. Fazal N, Webb A, Bangoura J, et al. Telehealth: improving maternity services by modern technology. *BMJ Open Qual* 2020;9(4) doi: 10.1136/bmjopen-2019-000895 [published Online First: 2020/11/06]
6. Shah SS, Gvozdanovic A, Knight M, et al. Mobile App-Based Remote Patient Monitoring in Acute Medical Conditions: Prospective Feasibility Study Exploring Digital Health Solutions on Clinical Workload During the COVID Crisis. *JMIR Form Res* 2021;5(1):e23190. doi: 10.2196/23190 [published Online First: 2021/01/06]
7. Ong MK, Romano PS, Edgington S, et al. Effectiveness of Remote Patient Monitoring After Discharge of Hospitalized Patients With Heart Failure: The Better Effectiveness After Transition -- Heart Failure (BEAT-HF) Randomized Clinical Trial. *JAMA Intern Med* 2016;176(3):310-8. doi: 10.1001/jamainternmed.2015.7712 [published Online First: 2016/02/10]
8. Bodenheimer T, Sinsky C. From triple to quadruple aim: care of the patient requires care of the provider. *Annals of family medicine* 2014;12(6):573-6. doi: 10.1370/afm.1713 [published Online First: 2014/11/12]
9. Global diffusion of eHealth: making universal health coverage achievable. Report of the third global survey on eHealth. Geneva: World Health Organization, 2016.
10. COMMUNICATION FROM THE COMMISSION TO THE EUROPEAN PARLIAMENT, THE COUNCIL, THE EUROPEAN ECONOMIC AND SOCIAL COMMITTEE AND THE COMMITTEE OF THE REGIONS on enabling the digital transformation of health and care in the Digital Single Market; empowering citizens and building a healthier society. In: Commission E, ed., 2018.
11. Rapport De juiste zorg op de juiste plek: Taskforce zorg op de juiste plek, 2018.
12. Henderson C, Knapp M, Fernandez JL, et al. Cost effectiveness of telehealth for patients with long term conditions (Whole Systems Demonstrator telehealth questionnaire study): nested economic evaluation in a pragmatic, cluster randomised controlled trial. *Bmj* 2013;346(mar20 4):f1035-f35. doi: 10.1136/bmj.f1035
13. Ross J, Stevenson F, Lau R, et al. Factors that influence the implementation of e-health: a systematic review of systematic reviews (an update). *Implement Sci* 2016;11(1):146. doi: 10.1186/s13012-016-0510-7 [published Online First: 2016/10/27]
14. Scaling up projects and initiatives for better health: from concepts to practice WHO regional office for Europe 2016.
15. Munn Z, Peters MDJ, Stern C, et al. Systematic review or scoping review? Guidance for authors when choosing between a systematic or scoping review approach. *BMC medical research methodology* 2018;18(1):143. doi: 10.1186/s12874-018-0611-x [published Online First: 2018/11/21]
16. Arksey H, O'Malley L. Scoping studies: towards a methodological framework. *International Journal of Social Research Methodology* 2005;8(1):19-32. doi: 10.1080/1364557032000119616
17. Moher D, Liberati A, Tetzlaff J, et al. Preferred reporting items for systematic reviews and meta-analyses: the PRISMA statement. *PLoS medicine* 2009;6(7):e1000097. doi: 10.1371/journal.pmed.1000097 [published Online First: 2009/07/22]

18. Peters MDJ, Marnie C, Tricco AC, et al. Updated methodological guidance for the conduct of scoping reviews. *JBI Evid Implement* 2021;19(1):3-10. doi: 10.1097/XEB.0000000000000277 [published Online First: 2021/02/12]
19. Ouzzani M, Hammady H, Fedorowicz Z, et al. Rayyan-a web and mobile app for systematic reviews. *Systematic reviews* 2016;5(1):210. doi: 10.1186/s13643-016-0384-4 [published Online First: 2016/12/07]
20. Mendel P, Meredith LS, Schoenbaum M, et al. Interventions in organizational and community context: a framework for building evidence on dissemination and implementation in health services research. *Adm Policy Ment Health* 2008;35(1-2):21-37. doi: 10.1007/s10488-007-0144-9 [published Online First: 2007/11/09]
21. Aamodt IT, Lycholip E, Celutkiene J, et al. Health Care Professionals' Perceptions of Home Telemonitoring in Heart Failure Care: Cross-Sectional Survey. *J Med Internet Res* 2019;21(2):e10362. doi: 10.2196/10362 [published Online First: 2019/02/07]
22. Alkmim MB, Silva CBG, Figueira RM, et al. Brazilian National Service of Telediagnosis in Electrocardiography. *Stud Health Technol Inform*;264:1635-36.
23. Cook DJ, Doolittle GC, Ferguson D, et al. Explaining the adoption of telemedicine services: an analysis of a paediatric telemedicine service. *J Telemed Telecare* 2002;8:106-7.
24. Chronaki CE, Vardas P. Remote monitoring costs, benefits, and reimbursement: a European perspective. *Europace*;15:i59-i64.
25. Faber S, van Geenhuizen M, de Reuver M. eHealth adoption factors in medical hospitals: A focus on the Netherlands. *Int J Med Inform* 2017;100:77-89. doi: 10.1016/j.ijmedinf.2017.01.009 [published Online First: 2017/03/01]
26. Fraiche AM, Eapen ZJ, McClellan MB. Moving Beyond the Walls of the Clinic: Opportunities and Challenges to the Future of Telehealth in Heart Failure. *JACC Heart Fail*;5(4):297-304.
27. Hanley J, Pinnock H, Paterson M, et al. Implementing telemonitoring in primary care: learning from a large qualitative dataset gathered during a series of studies. *BMC Fam Pract*;19(1):118.
28. Kato NP, Johansson P, Okada I, et al. Heart Failure Telemonitoring in Japan and Sweden: A Cross-Sectional Survey. *J Med Internet Res* 2015;17(11):e258. doi: 10.2196/jmir.4825 [published Online First: 2015/11/15]
29. Klack L, Ziefle M, Wilkowska W, et al. Telemedical versus conventional heart patient monitoring: a survey study with German physicians. *Int J Technol Assess Health Care*;29(4):378-83.
30. Kristensen MBD, Hoiberg L, Nohr C. Updated Mapping of Telemedicine Projects in Denmark. *Stud Health Technol Inform* 2019;257:223-28.
31. MacNeill V, ers C, Fitzpatrick R, et al. Experiences of front-line health professionals in the delivery of telehealth: a qualitative study. *Br J Gen Pract*;64(624):e401-7.
32. McGillion MH, Duceppe E, Allan K, et al. Postoperative Remote Automated Monitoring: Need for and State of the Science. *Canadian Journal of Cardiology*;34(7):850-62.
33. Muigg D, Kastner P, Duftschmid G, et al. Readiness to use telemonitoring in diabetes care: a cross-sectional study among Austrian practitioners. *BMC Med Inform Decis Mak* 2019;19(1):26. doi: 10.1186/s12911-019-0746-7 [published Online First: 2019/01/31]
34. Okazaki S, Castaneda JA, Sanz S. Clinicians' assessment of mobile monitoring: a comparative study in Japan and Spain. *Med 2 0*;2(2):e11.
35. Taylor J, Coates E, Brewster L, et al. Examining the use of telehealth in community nursing: identifying the factors affecting frontline staff acceptance and telehealth adoption. *J Adv Nurs*;71(2):326-37.
36. de Vries AE, van der Wal MH, Nieuwenhuis MM, et al. Health professionals' expectations versus experiences of internet-based telemonitoring: survey among heart failure clinics. *J Med Internet Res*;15(1):e4.
37. Gawalko M, Duncker D, Manninger M, et al. The European TeleCheck-AF project on remote app-based management of atrial fibrillation during the COVID-19 pandemic: centre and patient

- 1  
2  
3 experiences. *Europace* 2021 doi: 10.1093/europace/euab050 [published Online First:  
4 2021/04/07]
- 5  
6 38. van den Heuvel JFM, Ayubi S, Franx A, et al. Home-Based Monitoring and Telemonitoring of  
7 Complicated Pregnancies: Nationwide Cross-Sectional Survey of Current Practice in the  
8 Netherlands. *JMIR Mhealth Uhealth* 2020;8(10):e18966. doi: 10.2196/18966 [published  
9 Online First: 2020/10/29]
- 10  
11 39. Cook EJ, hawa G, Sharp C, et al. Exploring the factors that influence the decision to adopt and  
12 engage with an integrated assistive telehealth and telecare service in Cambridgeshire, UK: a  
13 nested qualitative study of patient 'users' and 'non-users'. *BMC Health Serv Res*;16:137.
- 14  
15 40. Diaz-Skeete Y, Giggins OM, McQuaid D, et al. Enablers and obstacles to implementing remote  
16 monitoring technology in cardiac care: A report from an interactive workshop. *Health  
17 informatics journal* 2019;1460458219892175. doi:  
18 <http://dx.doi.org/10.1177/1460458219892175>
- 19  
20 41. [cited 2020 june 3rd]. Available from: <https://telemedicinsk-landkort.dk>
- 21  
22 42. Sulz S, van Elten HJ, Askari M, et al. eHealth Applications to Support Independent Living of Older  
23 Persons: Scoping Review of Costs and Benefits Identified in Economic Evaluations. *J Med  
24 Internet Res* 2021;23(3):e24363. doi: 10.2196/24363 [published Online First: 2021/03/10]
- 25  
26 43. van den Heuvel JFM, van Lieshout C, Franx A, et al. SAFE@HOME: Cost analysis of a new care  
27 pathway including a digital health platform for women at increased risk of preeclampsia.  
28 *Pregnancy Hypertens* 2021;24:118-23. doi: 10.1016/j.preghy.2021.03.004 [published Online  
29 First: 2021/04/05]
- 30  
31 44. Seto E. Cost comparison between telemonitoring and usual care of heart failure: a systematic  
32 review. *Telemed J E Health* 2008;14(7):679-86. doi: 10.1089/tmj.2007.0114 [published Online  
33 First: 2008/09/27]
- 34  
35 45. Miller EA. Solving the disjuncture between research and practice: telehealth trends in the 21st  
36 century. *Health Policy* 2007;82(2):133-41. doi: 10.1016/j.healthpol.2006.09.011 [published  
37 Online First: 2006/10/19]
- 38  
39 46. Simblett S, Greer B, Matcham F, et al. Barriers to and Facilitators of Engagement With Remote  
40 Measurement Technology for Managing Health: Systematic Review and Content Analysis of  
41 Findings. *J Med Internet Res* 2018;20(7):e10480. doi: 10.2196/10480 [published Online First:  
42 2018/07/14]
- 43  
44 47. Varsi C, Solberg Nes L, Kristjansdottir OB, et al. Implementation Strategies to Enhance the  
45 Implementation of eHealth Programs for Patients With Chronic Illnesses: Realist Systematic  
46 Review. *J Med Internet Res* 2019;21(9):e14255. doi: 10.2196/14255 [published Online First:  
47 2019/10/02]
- 48  
49 48. Ahmed B, Dannhauser T, Philip N. A systematic review of reviews to identify key research  
50 opportunities within the field of eHealth implementation. *J Telemed Telecare*  
51 2019;25(5):276-85. doi: 10.1177/1357633X18768601 [published Online First: 2018/04/29]
- 52  
53 49. Scott Kruse C, Karem P, Shifflett K, et al. Evaluating barriers to adopting telemedicine worldwide:  
54 A systematic review. *J Telemed Telecare* 2018;24(1):4-12. doi: 10.1177/1357633X16674087  
55 [published Online First: 2018/01/13]  
56  
57  
58  
59  
60

**Table 1 Reasons for exclusion. EHR = Electronic Health Record, mHealth = mobile Health, RFID = Radio-frequency identification, tele-ICU = tele intensive care unit, AI = artificial intelligence, AR/VR = augmented reality / virtual reality.**

| # excluded |      | Reasons                                                                                                                                                                                                                                                                                                                                                                                                                                                                                                                                                                                                                                                                                                                                                                                            |
|------------|------|----------------------------------------------------------------------------------------------------------------------------------------------------------------------------------------------------------------------------------------------------------------------------------------------------------------------------------------------------------------------------------------------------------------------------------------------------------------------------------------------------------------------------------------------------------------------------------------------------------------------------------------------------------------------------------------------------------------------------------------------------------------------------------------------------|
| 1938       | 1688 | Not describing telemonitoring as defined in the inclusion criteria; but described<br>449 teleconsultation<br>314 mHealth applications (without telemonitoring functionality)<br>217 health informatics topic in general<br>121 implementation of an EHR<br>93 e-mental health<br>55 lifestyle promotion<br>43 internet based therapy<br>20 tele-dermatology<br>16 addiction related<br>16 tele-rehabilitation<br>13 e-prescription<br>12 tele-ICU<br>12 smart home (care)<br>10 related to systems and technology<br>8 teledentistry<br>6 AI related<br>5 e-registries<br>5 teleradiology<br>4 tele-ophtalmology<br>3 background articles<br>2 teleaudiology, 2 blockchain, 2 internet of things, 2 robotics, 1 RFID, 1 AR/VR<br>283 excluded for not describing telemonitoring with other reasons |
|            | 139  | articles described a telemonitoring or eHealth project, without describing implementation or adoption.                                                                                                                                                                                                                                                                                                                                                                                                                                                                                                                                                                                                                                                                                             |
|            | 51   | Articles described telemonitoring implementation, but not in more than one independent organisation or setting and across geographical boundaries.                                                                                                                                                                                                                                                                                                                                                                                                                                                                                                                                                                                                                                                 |
|            | 25   | study protocol                                                                                                                                                                                                                                                                                                                                                                                                                                                                                                                                                                                                                                                                                                                                                                                     |
|            | 21   | opinion papers or interviews                                                                                                                                                                                                                                                                                                                                                                                                                                                                                                                                                                                                                                                                                                                                                                       |
|            | 14   | non-English                                                                                                                                                                                                                                                                                                                                                                                                                                                                                                                                                                                                                                                                                                                                                                                        |

**Table 2 Study characteristics**

| #  | Study and year              | Country              | Design                                 | Condition                                                          | Type of telemonitoring                                         | Analysis                                                | Outcome measures for adoption                                             |
|----|-----------------------------|----------------------|----------------------------------------|--------------------------------------------------------------------|----------------------------------------------------------------|---------------------------------------------------------|---------------------------------------------------------------------------|
| 1  | Aamodt 2019 <sup>21</sup>   | Norway and Lithuania | Cross-sectional survey                 | Heart failure care                                                 | Body weight, blood pressure, heart rate, dyspnea               | Summative content analysis                              | Reported as not part of routine care / standard care                      |
| 2  | Alkmim 2019 <sup>22</sup>   | Brazil               | Survey                                 | Cardiology                                                         | Tele-ECG                                                       | Descriptive statistics                                  | Utilisation >3dys per week                                                |
| 3  | Chronaki 2013 <sup>24</sup> | Europe               | Narrative review                       | Diverse                                                            | Tele-ECG                                                       | N.a.                                                    | Health care costs + number of clinics engaging in TM                      |
| 4  | Cook 2016 <sup>39</sup>     | UK                   | Qualitative semi-structured interviews | COPD                                                               | Telehealth: Pulse oximetry, temperature, pulse, blood pressure | Framework method                                        | N.a.                                                                      |
| 5  | Diaz-Skeete <sup>40</sup>   | Republic of Ireland  | Workshop report                        | Cardiac care                                                       | n.a.                                                           | n.a.                                                    | n.a.                                                                      |
| 6  | Faber, 2017 <sup>25</sup>   | Netherlands          | Survey                                 | Heart failure + diabetes                                           | N.a.                                                           | Structured equation modelling approach                  | Extent of adoption in percentages                                         |
| 7  | Fraiche 2017 <sup>26</sup>  | US                   | Narrative review                       | Heart failure                                                      | Blood pressure, weight, ECG                                    | N.a.                                                    | N.a.                                                                      |
| 8  | Hanley 2018 <sup>27</sup>   | Scotland             | Qualitative interview + focus groups   | COPD, hypertension, BP after stroke, COPD, heart failure, diabetes | SpO2, BP, blood glucose,                                       | Interpretive description approach and thematic analysis | N.a.                                                                      |
| 9  | Kato 2015 <sup>28</sup>     | Japan and Sweden     | Cross-sectional survey                 | Heart failure                                                      | Monitoring physical condition and noticing a decline           | Descriptive analysis and content analysis methodology   | 4 domains<br>Reported as not part of routine care                         |
| 10 | Klack, 2013 <sup>29</sup>   | Germany              | Survey                                 | Heart patient                                                      | weight, temperature, blood pressure, coagulation               | Descriptive statistics                                  | Physician and engineers perspectives<br>Extent of adoption in percentages |



|    |                                   |                 |                                        |                                                                                                                         |                                                                       |                                                 |                                                             |
|----|-----------------------------------|-----------------|----------------------------------------|-------------------------------------------------------------------------------------------------------------------------|-----------------------------------------------------------------------|-------------------------------------------------|-------------------------------------------------------------|
| 11 | Kristensen 2019 <sup>30</sup>     | Denmark         | Email survey                           | Chronic heart failure, atrial fibrillation, COPD, ADHD, Pregnant with complications, hypertension, patients with an ICD | Blood pressure, heart rhythm, body weight, heart rate, blood glucose, | Number of initiatives in interactive map online | Number of projects registered.                              |
| 12 | MacNeill, 2014 <sup>31</sup>      | UK              | Semi structured qualitative interviews | Chronic heart disease, COPD and diabetes                                                                                | Blood pressure, weight, oxygen, blood glucose                         | Modified grounded theory                        |                                                             |
| 13 | McGillion 2018 <sup>32</sup>      | Canada          | Narrative review                       | Surgical population                                                                                                     | Respiratory rate, blood pressure, heart rate, SpO2, temperature       | N.a.                                            | N.a.                                                        |
| 14 | Muigg, 2019 <sup>33</sup>         | Austria         | Cross-sectional survey                 | Diabetes                                                                                                                | Blood pressure and blood glucose                                      | Qualitative content analysis                    | Reported as not part of routine care                        |
| 15 | Okazaki, 2013 <sup>34</sup>       | Japan and Spain | Survey                                 | Not specified                                                                                                           | Not specified                                                         | Causal modeling                                 | n.a.                                                        |
| 16 | Taylor, 2014 <sup>35</sup>        | UK              | Qualitative interviews                 | COPD and Chronic heart failure                                                                                          | Not specified                                                         | Thematic analysis                               | n.a.                                                        |
| 17 | de Vries, 2013 <sup>36</sup>      | Netherlands     | Survey                                 | Heart failure                                                                                                           | Blood pressure, weight, heart frequency, ECG                          | Descriptive statistics                          | Usage                                                       |
| 18 | Van den Heuvel <sup>38</sup> 2020 | Netherlands     | Survey                                 | Women with pregnancy complications                                                                                      | Cardiotocography                                                      | Descriptive statistics                          | Provision of telemonitoring and perspectives of respondents |
| 19 | Gawalko <sup>37</sup> 2021        | Europe          | Survey                                 | Management of atrial fibrillation                                                                                       | Remote PPG or 1-lead ECG                                              | Descriptive statistics                          | Centre experience and patient experience.                   |

n.a. = not available

**Table 3. An overview of factors, classified by the “diffusion process” items of Mendel’s framework**

|                          | #Factors  | #Described | #Barriers | #Enablers | #Both     |
|--------------------------|-----------|------------|-----------|-----------|-----------|
| 1. Norms & Attitudes     | 31        | 51         | 12        | 10        | 9         |
| 2. Structure & Process   | 16        | 33         | 3         | 3         | 10        |
| 3. Resources             | 19        | 75         | 2         | 2         | 15        |
| 4. Policies & Incentives | 10        | 23         | 0         | 1         | 9         |
| 5. Networks & Linkages   | 3         | 8          | 1         | 1         | 1         |
| 6. Media & Change agents | 10        | 12         | 0         | 9         | 1         |
| <b>Total</b>             | <b>89</b> | <b>202</b> | <b>18</b> | <b>26</b> | <b>45</b> |

The number of times factors of influence were described in total; and the number of times factors were described as barrier, enabler or both.

**Table 4. Overview of factors – barriers and/or enablers – that influence nationwide upscaling of telemonitoring.**

| Domain                                                                                                                                                                                                                 | Contextual factors | Detailed description                                                                                                                                                                                      | Barrier, Enabler or Both | Number of times mentioned in publications |
|------------------------------------------------------------------------------------------------------------------------------------------------------------------------------------------------------------------------|--------------------|-----------------------------------------------------------------------------------------------------------------------------------------------------------------------------------------------------------|--------------------------|-------------------------------------------|
| Context of diffusion                                                                                                                                                                                                   | Norms & Attitudes  | HCP think that patients become too dependent on technology <sup>27 31 39</sup>                                                                                                                            | Barrier                  | 4                                         |
|                                                                                                                                                                                                                        |                    | HCP have scepticism or reservations about TM <sup>28 31 35</sup>                                                                                                                                          | Barrier                  | 3                                         |
|                                                                                                                                                                                                                        |                    | There must be a perceived usefulness and usability of equipment <sup>27 31 39</sup>                                                                                                                       | Both                     | 3                                         |
|                                                                                                                                                                                                                        |                    | TM is convenient for patients <sup>27 31 37</sup>                                                                                                                                                         | Enabler                  | 3                                         |
|                                                                                                                                                                                                                        |                    | HCP have a positive attitude (towards usefulness, feasibility, potential) <sup>29 31 37</sup>                                                                                                             | Enabler                  | 3                                         |
|                                                                                                                                                                                                                        |                    | There is concern amongst HCP that acting on the TM data provided could lead to overtreatment <sup>27 31</sup>                                                                                             | Barrier                  | 2                                         |
|                                                                                                                                                                                                                        |                    | HCP consider use of TM relevant <sup>21 28</sup>                                                                                                                                                          | Enabler                  | 2                                         |
|                                                                                                                                                                                                                        |                    | HCP have high expectations of working with TM <sup>36</sup>                                                                                                                                               | Both                     | 2                                         |
|                                                                                                                                                                                                                        |                    | TM makes patients anxious <sup>27 31</sup>                                                                                                                                                                | Barrier                  | 2                                         |
|                                                                                                                                                                                                                        |                    | HCP think that TM can increase workload and make planning more difficult <sup>35 36</sup>                                                                                                                 | Barrier                  | 2                                         |
|                                                                                                                                                                                                                        |                    | Make patients feel more empowered to take a pro-active approach to their health <sup>27</sup> or should be empowered to engage with technologies for self-management and self-care purposes <sup>40</sup> | Enabler                  | 2                                         |
|                                                                                                                                                                                                                        |                    | HCP perceive a shift to technology making medical decisions or support in medical decision making <sup>29 37</sup>                                                                                        | Both                     | 2                                         |
|                                                                                                                                                                                                                        |                    | Although the HCP had high perceptions and expectations of working with TM, these were not positively reflected in the actual experiences. <sup>36</sup>                                                   | Barrier                  | 1                                         |
|                                                                                                                                                                                                                        |                    | HCP expect to manage caseload more efficiently <sup>35</sup>                                                                                                                                              | Enabler                  | 1                                         |
|                                                                                                                                                                                                                        |                    | Change personal practice <sup>27</sup>                                                                                                                                                                    | Both                     | 1                                         |
|                                                                                                                                                                                                                        |                    | Concerns about the impact of telehealth on nursing roles <sup>35</sup>                                                                                                                                    | Barrier                  | 1                                         |
|                                                                                                                                                                                                                        |                    | HCP experience a lack of advantage <sup>28</sup>                                                                                                                                                          | Barrier                  | 1                                         |
| HCP who have the knowledge and experience in TM, tend to have a less positive attitude compared with technical professionals, who might be driven by their greater enthusiasm for technology in general. <sup>29</sup> | Both               | 1                                                                                                                                                                                                         |                          |                                           |
| HCP think that TM is more expensive than conventional treatment <sup>29</sup>                                                                                                                                          | Barrier            | 1                                                                                                                                                                                                         |                          |                                           |
| Technical professionals are more confident about patient compliance than HCP <sup>29</sup>                                                                                                                             | Both               | 1                                                                                                                                                                                                         |                          |                                           |
| HCP concern about privacy protection <sup>29</sup>                                                                                                                                                                     | Barrier            | 1                                                                                                                                                                                                         |                          |                                           |

|  |                                    |                                                                                                                                                                                                                                                               |         |   |
|--|------------------------------------|---------------------------------------------------------------------------------------------------------------------------------------------------------------------------------------------------------------------------------------------------------------|---------|---|
|  |                                    | HCP concern about the loss of control over the medical treatment <sup>29</sup>                                                                                                                                                                                | Barrier | 1 |
|  |                                    | HCP think that patient acceptance is a factor of influence <sup>37</sup>                                                                                                                                                                                      | Both    | 1 |
|  |                                    | Use of telehealth is an important new skill for HCP, as was the ability to understand trends in the management of long-term conditions <sup>31</sup>                                                                                                          | Enabler | 1 |
|  |                                    | HCP see TM as an opportunity for professional career development <sup>31</sup>                                                                                                                                                                                | Enabler | 1 |
|  |                                    | HCP consider "Our centre is innovative" <sup>21</sup>                                                                                                                                                                                                         | Enabler | 1 |
|  |                                    | Patients need to accept their old age and health condition, before they use TM <sup>39</sup>                                                                                                                                                                  | Both    | 1 |
|  |                                    | Reducing the level of face-to-face contact with the patients was a concern for professionals, but this concern was not universally shared by patients, some of whom experienced the non-face-to-face contact as additional and efficient input. <sup>27</sup> | Enabler | 1 |
|  |                                    | HCP have concerns about the appropriateness of telehealth for the very severely ill <sup>31</sup>                                                                                                                                                             | Barrier | 1 |
|  |                                    | Early positive experiences and the sharing of success were identified as key enablers for staff acceptance. Early negative experiences of telehealth have a long-lasting impact on staff acceptance and the predominant view among participants <sup>35</sup> | Both    | 1 |
|  |                                    | HCP state that telemonitoring provides higher patient satisfaction (related to home-monitoring) and does not require hospital staff to visit patients at home <sup>38</sup>                                                                                   | Enabler | 1 |
|  | Organisational structure & process | Security and privacy aspects that influence implementation <sup>21 24 28 32 38 40</sup>                                                                                                                                                                       | Both    | 6 |
|  |                                    | Rules and protocols on the implementation of the system and responsibility for incoming data <sup>21 28 35 36 40</sup>                                                                                                                                        | Both    | 5 |
|  |                                    | Certain processes / coordination support implementation of TM <sup>28 32 35 36</sup>                                                                                                                                                                          | Both    | 4 |
|  |                                    | Use of TM enables clinical decision support and influence adoption of guidelines <sup>24 26 27</sup>                                                                                                                                                          | Enabler | 3 |
|  |                                    | Regular data sharing had a motivating effect on patients, as they were aware that at some point the readings may be reviewed <sup>27</sup> or is a possible limitation <sup>40</sup>                                                                          | Both    | 2 |
|  |                                    | A wide program of change management to support healthcare transformation and adoption of new working practices <sup>24 40</sup>                                                                                                                               | Both    | 2 |
|  |                                    | Reduce admissions or readmissions <sup>21 36</sup>                                                                                                                                                                                                            | Enabler | 2 |
|  |                                    | Creating central databases making the transmitted data accessible to the treating physician and serving as data registries that benefit medical research <sup>24</sup>                                                                                        | Enabler | 1 |
|  |                                    | Set up appropriate vendor agreements and infrastructure <sup>24</sup>                                                                                                                                                                                         | Both    | 1 |
|  |                                    | Protocols on the acceptable length of time between the moment of incoming patient data and the response of the HCP(response-reaction time) <sup>36</sup>                                                                                                      | Both    | 1 |

|  |                       |                                                                                                                                                               |         |   |
|--|-----------------------|---------------------------------------------------------------------------------------------------------------------------------------------------------------|---------|---|
|  |                       | Difficult to obtain relevant data about patients and ensuring that relevant data – limited tailoring to individual patient - is shared with HCP <sup>35</sup> | Barrier | 1 |
|  |                       | Limited options for discharging patients who will benefit from continued use <sup>35</sup>                                                                    | Barrier | 1 |
|  |                       | Referral routes should be opened up for patients with other conditions and with less complex needs <sup>35</sup>                                              | Both    | 1 |
|  |                       | A changing environment is a barrier <sup>35</sup>                                                                                                             | Barrier | 1 |
|  |                       | The introduction (the way of communication, red.) to frontline staff influences implementation <sup>35</sup>                                                  | Both    | 1 |
|  |                       | Organisational size influences implementation of TM <sup>25</sup>                                                                                             | Both    | 1 |
|  | Resources             | Costs / financing of TM <sup>21 24-26 28 35-38</sup>                                                                                                          | Both    | 9 |
|  |                       | Knowledge of HCP / training of frontline staff <sup>21 24 28 32 35-37 40</sup>                                                                                | Both    | 8 |
|  |                       | Reimbursement as an element of financial resources <sup>21 24 26 28 33 37 38 40</sup>                                                                         | Both    | 8 |
|  |                       | The TM-system access to the EMR / interfacing of technologies <sup>24 26 27 32 35 37</sup>                                                                    | Both    | 6 |
|  |                       | Design of telemonitoring system / usability <sup>26 27 32 37 39 40</sup>                                                                                      | Both    | 6 |
|  |                       | Availability of equipment <sup>21 28 35 37</sup>                                                                                                              | Both    | 5 |
|  |                       | Sufficient staffing <sup>26 28 32 37 40</sup>                                                                                                                 | Both    | 5 |
|  |                       | Time for implementation TM <sup>27 32 35</sup>                                                                                                                | Both    | 5 |
|  |                       | Lack of evidence for TM <sup>21 24 26 40</sup>                                                                                                                | Both    | 4 |
|  |                       | Engage stakeholders in system design <sup>32 35 40</sup>                                                                                                      | Both    | 4 |
|  |                       | (Lack of)Cloud acces, internet access or cellular access <sup>28 32 37</sup>                                                                                  | Both    | 3 |
|  |                       | Organisational readiness <sup>25 33</sup>                                                                                                                     | Both    | 2 |
|  |                       | Significant income disparities which impact the ability to enforce guidelines and advance adoption of TM <sup>24</sup>                                        | Barrier | 2 |
|  |                       | An externally resourced system for installation, technical support, maintenance and de-installation <sup>35 37</sup>                                          | Both    | 2 |
|  |                       | Local “champions” <sup>35</sup>                                                                                                                               | Both    | 1 |
|  |                       | Top management support <sup>25 40</sup>                                                                                                                       | Both    | 1 |
|  |                       | Staff to assume monitoring and management responsibilities for patients outside the hospital <sup>26</sup>                                                    | Both    | 1 |
|  |                       | On-boarding process to a TM project. <sup>37</sup>                                                                                                            | Both    | 1 |
|  |                       | (Patient)education to address concerns regarding the use of remote monitoring , specifically for older adults, as an enabler <sup>40</sup>                    | Enabler | 1 |
|  |                       | Assessment of added value should be calculated <sup>38</sup>                                                                                                  | Enabler | 1 |
|  | Policies & Incentives | Addressing security, social and ethical issues to enable implementation of TM <sup>24 28 32 37 38</sup>                                                       | Both    | 5 |

|  |                       |                                                                                                                                                                                      |         |   |
|--|-----------------------|--------------------------------------------------------------------------------------------------------------------------------------------------------------------------------------|---------|---|
|  |                       | A (lack of) vision of an organisation on implementing TM <sup>21 28 35</sup>                                                                                                         | Both    | 3 |
|  |                       | Worldwide, European and statelevel policies and legal and regulatory frameworks <sup>24 26 40</sup>                                                                                  | Both    | 3 |
|  |                       | New or adjusted workflows, care paths or data management <sup>24 27 37</sup>                                                                                                         | Both    | 3 |
|  |                       | Consensus statements and national guidelines <sup>22 24</sup>                                                                                                                        | Both    | 2 |
|  |                       | Reimbursement or alternative payment models as a financial incentive for organisations <sup>24 26</sup>                                                                              | Both    | 2 |
|  |                       | Target patients, volume of population, data load and work intensity within organisations <sup>28 35 37</sup>                                                                         | Both    | 3 |
|  |                       | Interoperability standards crucial to the success of scaling remote patient monitoring programs <sup>32</sup>                                                                        | Both    | 1 |
|  |                       | Policy and practice developments affecting health care services <sup>35</sup>                                                                                                        | Both    | 1 |
|  |                       | Importance of TM for health authorities <sup>21</sup>                                                                                                                                | Enabler | 1 |
|  | Networks & Linkages   | Collaboration non-profit or public-private organisations <sup>22 24 26 35 40</sup>                                                                                                   | Both    | 5 |
|  |                       | Not being able to collaborate with other hospitals or clinics and primary care providers <sup>28 32</sup>                                                                            | Barrier | 2 |
|  |                       | Professional organisations in collaboration with national societies can play an important role in catalysing reimbursement and adoption <sup>24</sup>                                | Enabler | 1 |
|  | Media & Change Agents | Advocates, early adopters and local champions enable implementation of TM <sup>24 35</sup>                                                                                           | Enabler | 2 |
|  |                       | Create (and increase) awareness in the general clinical community of the potential that remote monitoring has <sup>37 40</sup>                                                       | Enabler | 2 |
|  |                       | A standardized initiation video call to inform and instruct each participating centre <sup>37</sup>                                                                                  | Enabler | 1 |
|  |                       | (Lack of) guidelines from health care authorities <sup>21</sup>                                                                                                                      | Both    | 1 |
|  |                       | Device manufacturer that invest in TM <sup>24</sup>                                                                                                                                  | Enabler | 1 |
|  |                       | The dynamics in the COVID-19 pandemic may have impacted the use of TM <sup>37</sup>                                                                                                  | Enabler | 1 |
|  |                       | Consensus on the implementation and research agenda can pave the road to the widespread use of digital health services <sup>38</sup>                                                 | Enabler | 1 |
|  |                       | A national repository could act as the first port of call where policy makers, clinicians and users could access information on remote monitoring projects <sup>40</sup>             | Enabler | 1 |
|  |                       | Information about strategies to educate and empower patients were provided <sup>37</sup>                                                                                             | Enabler | 1 |
|  |                       | Professional societies can review and potentially endorse TM applications that offer valuable decision support and empower the physician's relationship to the patient <sup>24</sup> | Enabler | 1 |

HCP= Health Care Professional, TM= Telemonitoring

**Table 5. The (expected) intervention outcomes when telemonitoring is implemented.**

| Domain                | Contextual factors             | Detailed description                                                               | Number of publications mentioned |
|-----------------------|--------------------------------|------------------------------------------------------------------------------------|----------------------------------|
| Intervention outcomes | Patient care & health outcomes | (improve) self-care or patient empowerment <sup>21 24 27 28 36 40</sup>            | 6                                |
|                       |                                | (improve) quality of care <sup>21 28 33 36 40</sup>                                | 4                                |
|                       |                                | (improve) patient education <sup>21 28 36</sup>                                    | 3                                |
|                       |                                | (improve) symptoms of disease <sup>28 36</sup>                                     | 2                                |
|                       |                                | (improve) quality of life <sup>24</sup>                                            | 1                                |
|                       | Organisation & System outcomes | Treat more patients (and reduce admission and visits) <sup>21 24 28 33 36 40</sup> | 5                                |
|                       |                                | (reduce) workload <sup>21 28 33 36</sup>                                           | 4                                |
|                       |                                | (reduce) costs <sup>21 24 28</sup>                                                 | 3                                |
|                       |                                | (improve) adherence to guidelines <sup>21 36</sup>                                 | 2                                |
|                       |                                | Contribute to continuity of care <sup>24</sup>                                     | 1                                |

### Appendix 1. Preliminary search

| Database               | Search syntax                                                                                                                                                                                                                                                                                                                                        | Results                                                                               |
|------------------------|------------------------------------------------------------------------------------------------------------------------------------------------------------------------------------------------------------------------------------------------------------------------------------------------------------------------------------------------------|---------------------------------------------------------------------------------------|
| Pubmed                 | ("Telemedicine"[Mesh] OR telemedicine[tiab] OR mhealth[tiab] OR m-health[tiab] OR ehealth[tiab] OR e-health[tiab]) AND ("Monitoring, Physiologic"[Mesh] OR "Monitoring, Ambulatory"[Mesh] OR telemonitor*[tiab]) AND ("Implementation Science"[Mesh] OR "Health Plan Implementation"[Mesh] AND scale up[tiab] OR implement*[tiab] OR adoption[tiab]) | 723 of which 156 meta-analysis or reviews. None relevant for upscaling telemonitoring |
| JBI Evidence Synthesis | Telemonitoring AND Implementation                                                                                                                                                                                                                                                                                                                    | 14 results, none relevant.                                                            |
| Open Science framework | Telemonitoring OR telemedicine                                                                                                                                                                                                                                                                                                                       | 29 registries, none about upscaling                                                   |
| Prospero database      | (telemonitoring [all fields] OR telemedicine [MeSH]) AND Implementation Science [MeSH] OR Regional Health Planning [MeSH] OR Health Plan Implementation [MeSH] OR Implementation [all fields]                                                                                                                                                        | 102 results, none relevant for upscaling telemonitoring.                              |



## Appendix 2. Search syntax

### Search syntax:

("Telemedicine"[Mesh] OR telemedicine[tiab] OR mhealth[tiab] OR m-health[tiab] OR ehealth[tiab] OR e-health[tiab] OR out-of-office[tiab])

AND

("Monitoring, Physiologic"[Mesh] OR "Monitoring, Ambulatory"[Mesh] OR monitor\*[tiab] OR telemonitor\*[tiab] OR health care[tiab] OR healthcare[tiab])

AND

("Implementation Science"[Mesh] OR "Health Plan Implementation"[Mesh])

AND

scale up[tiab] OR implement\*[tiab] OR adoption[tiab])

AND

("Health Policy"[Mesh] OR "Policy Making"[Mesh] OR "National Health Program "[Mesh] OR policy[tiab] OR survey\*[tiab] OR mapping[tiab])

**Appendix 3**

Framework of dissemination in health services intervention research. From: Mendel et al 2008, *Adm Policy Ment Health* (2008) 35:21–37. The red lined box indicates the focus in this scoping review.

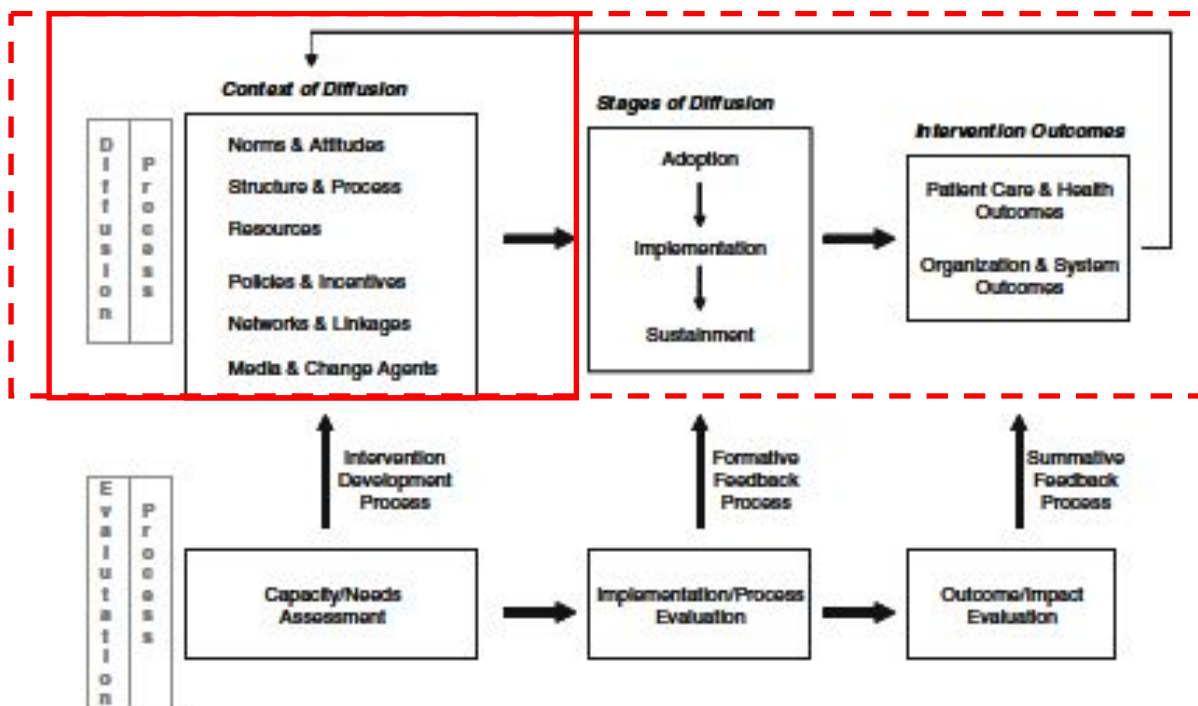

review only

1  
2  
3  
4  
5  
6  
7  
8  
9  
10  
11  
12  
13  
14  
15  
16  
17  
18  
19  
20  
21  
22  
23  
24  
25  
26  
27  
28  
29  
30  
31  
32  
33  
34  
35  
36  
37  
38  
39  
40  
41  
42  
43  
44  
45  
46  
47  
48  
49  
50  
51  
52  
53  
54  
55  
56  
57  
58  
59  
60

For peer review only

**Table 1 Reasons for exclusion. EHR = Electronic Health Record, mHealth = mobile Health, RFID = Radio-frequency identification, tele-ICU = tele intensive care unit, AI = artificial intelligence, AR/VR = augmented reality / virtual reality.**

| # excluded |      | Reasons                                                                                                                                                                                                                                                                                                                                                                                                                                                                                                                                                                                                                                                                                                                                                                                                                                                                                           |
|------------|------|---------------------------------------------------------------------------------------------------------------------------------------------------------------------------------------------------------------------------------------------------------------------------------------------------------------------------------------------------------------------------------------------------------------------------------------------------------------------------------------------------------------------------------------------------------------------------------------------------------------------------------------------------------------------------------------------------------------------------------------------------------------------------------------------------------------------------------------------------------------------------------------------------|
| 1938       | 1688 | <p>Not describing telemonitoring as defined in the inclusion criteria; but described</p> <p>449 teleconsultation</p> <p>314 mHealth applications (without telemonitoring functionality)</p> <p>217 health informatics topic in general</p> <p>121 implementation of an EHR</p> <p>93 e-mental health</p> <p>55 lifestyle promotion</p> <p>43 internet based therapy</p> <p>20 tele-dermatology</p> <p>16 addiction related</p> <p>16 tele-rehabilitation</p> <p>13 e-prescription</p> <p>12 tele-ICU</p> <p>12 smart home (care)</p> <p>10 related to systems and technology</p> <p>8 teledentistry</p> <p>6 AI related</p> <p>5 e-registries</p> <p>5 teleradiology</p> <p>4 tele-ophtalmology</p> <p>3 background articles</p> <p>2 teleaudiology, 2 blockchain, 2 internet of things, 2 robotics, 1 RFID, 1 AR/VR</p> <p>283 excluded for not describing telemonitoring with other reasons</p> |
|            | 139  | articles described a telemonitoring or eHealth project, without describing implementation or adoption.                                                                                                                                                                                                                                                                                                                                                                                                                                                                                                                                                                                                                                                                                                                                                                                            |
|            | 51   | Articles described telemonitoring implementation, but not in more than one independent organisation or setting and across geographical boundaries.                                                                                                                                                                                                                                                                                                                                                                                                                                                                                                                                                                                                                                                                                                                                                |
|            | 25   | study protocol                                                                                                                                                                                                                                                                                                                                                                                                                                                                                                                                                                                                                                                                                                                                                                                                                                                                                    |
|            | 21   | opinion papers or interviews                                                                                                                                                                                                                                                                                                                                                                                                                                                                                                                                                                                                                                                                                                                                                                                                                                                                      |
|            | 14   | non-English                                                                                                                                                                                                                                                                                                                                                                                                                                                                                                                                                                                                                                                                                                                                                                                                                                                                                       |

**Table 2 Study characteristics**

| #  | Study and year             | Country              | Design                                 | Condition                                                          | Type of telemonitoring                                         | Analysis                                                | Outcome measures for adoption                                             |
|----|----------------------------|----------------------|----------------------------------------|--------------------------------------------------------------------|----------------------------------------------------------------|---------------------------------------------------------|---------------------------------------------------------------------------|
| 1  | Aamodt 2019 <sup>1</sup>   | Norway and Lithuania | Cross-sectional survey                 | Heart failure care                                                 | Body weight, blood pressure, heart rate, dyspnea               | Summative content analysis                              | Reported as not part of routine care / standard care                      |
| 2  | Alkmim 2019 <sup>2</sup>   | Brazil               | Survey                                 | Cardiology                                                         | Tele-ECG                                                       | Descriptive statistics                                  | Utilisation >3 days per week                                              |
| 3  | Chronaki 2013 <sup>3</sup> | Europe               | Narrative review                       | Diverse                                                            | Tele-ECG                                                       | N.a.                                                    | Health care costs + number of clinics engaging in TM                      |
| 4  | Cook 2016 <sup>4</sup>     | UK                   | Qualitative semi-structured interviews | COPD                                                               | Telehealth: Pulse oximetry, temperature, pulse, blood pressure | Framework method                                        | N.a.                                                                      |
| 5  | Diaz-Skeete <sup>5</sup>   | Republic of Ireland  | Workshop report                        | Cardiac care                                                       | n.a.                                                           | n.a.                                                    | n.a.                                                                      |
| 6  | Faber, 2017 <sup>6</sup>   | Netherlands          | Survey                                 | Heart failure + diabetes                                           | N.a.                                                           | Structured equation modelling approach                  | Extent of adoption in percentages                                         |
| 7  | Fraiche 2017 <sup>7</sup>  | US                   | Narrative review                       | Heart failure                                                      | Blood pressure, weight, ECG                                    | N.a.                                                    | N.a.                                                                      |
| 8  | Hanley 2018 <sup>8</sup>   | Scotland             | Qualitative interview + focus groups   | COPD, hypertension, BP after stroke, COPD, heart failure, diabetes | SpO2, BP, blood glucose,                                       | Interpretive description approach and thematic analysis | N.a.                                                                      |
| 9  | Kato 2015 <sup>9</sup>     | Japan and Sweden     | Cross-sectional survey                 | Heart failure                                                      | Monitoring physical condition and noticing a decline           | Descriptive analysis and content analysis methodology   | 4 domains<br>Reported as not part of routine care                         |
| 10 | Klack, 2013 <sup>10</sup>  | Germany              | Survey                                 | Heart patient                                                      | weight, temperature, blood pressure, coagulation               | Descriptive statistics                                  | Physician and engineers perspectives<br>Extent of adoption in percentages |

|    |                                   |                 |                                        |                                                                                                                         |                                                                       |                                                 |                                                             |
|----|-----------------------------------|-----------------|----------------------------------------|-------------------------------------------------------------------------------------------------------------------------|-----------------------------------------------------------------------|-------------------------------------------------|-------------------------------------------------------------|
| 11 | Kristensen 2019 <sup>11</sup>     | Denmark         | Email survey                           | Chronic heart failure, atrial fibrillation, COPD, ADHD, Pregnant with complications, hypertension, patients with an ICD | Blood pressure, heart rhythm, body weight, heart rate, blood glucose, | Number of initiatives in interactive map online | Number of projects registered.                              |
| 12 | MacNeill, 2014 <sup>12</sup>      | UK              | Semi structured qualitative interviews | Chronic heart disease, COPD and diabetes                                                                                | Blood pressure, weight, oxygen, blood glucose                         | Modified grounded theory                        |                                                             |
| 13 | McGillion 2018 <sup>13</sup>      | Canada          | Narrative review                       | Surgical population                                                                                                     | Respiratory rate, blood pressure, heart rate, SpO2, temperature       | N.a.                                            | N.a.                                                        |
| 14 | Muigg, 2019 <sup>14</sup>         | Austria         | Cross-sectional survey                 | Diabetes                                                                                                                | Blood pressure and blood glucose                                      | Qualitative content analysis                    | Reported as not part of routine care                        |
| 15 | Okazaki, 2013 <sup>15</sup>       | Japan and Spain | Survey                                 | Not specified                                                                                                           | Not specified                                                         | Causal modeling                                 | n.a.                                                        |
| 16 | Taylor, 2014 <sup>16</sup>        | UK              | Qualitative interviews                 | COPD and Chronic heart failure                                                                                          | Not specified                                                         | Thematic analysis                               | n.a.                                                        |
| 17 | de Vries, 2013 <sup>17</sup>      | Netherlands     | Survey                                 | Heart failure                                                                                                           | Blood pressure, weight, heart frequency, ECG                          | Descriptive statistics                          | Usage                                                       |
| 18 | Van den Heuvel <sup>18</sup> 2020 | Netherlands     | Survey                                 | Women with pregnancy complications                                                                                      | Cardiotocography                                                      | Descriptive statistics                          | Provision of telemonitoring and perspectives of respondents |
| 19 | Gawalko <sup>19</sup> 2021        | Europe          | Survey                                 | Management of atrial fibrillation                                                                                       | Remote PPG or 1-lead ECG                                              | Descriptive statistics                          | Centre experience and patient experience.                   |

n.a. = not available

1  
2  
3  
4  
5  
6  
7  
8  
9  
10  
11  
12  
13  
14  
15  
16  
17  
18  
19  
20  
21  
22  
23  
24  
25  
26  
27  
28  
29  
30  
31  
32  
33  
34  
35  
36  
37  
38  
39  
40  
41  
42  
43  
44  
45  
46

**Table 3. An overview of factors, classified by the “diffusion process” items of Mendel’s framework**

|                          | #Factors  | #Described | #Barriers | #Enablers | #Both     |
|--------------------------|-----------|------------|-----------|-----------|-----------|
| 1. Norms & Attitudes     | 31        | 51         | 12        | 10        | 9         |
| 2. Structure & Process   | 16        | 33         | 3         | 3         | 10        |
| 3. Resources             | 19        | 75         | 2         | 2         | 15        |
| 4. Policies & Incentives | 10        | 23         | 0         | 1         | 9         |
| 5. Networks & Linkages   | 3         | 8          | 1         | 1         | 1         |
| 6. Media & Change agents | 10        | 12         | 0         | 9         | 1         |
| <b>Total</b>             | <b>89</b> | <b>202</b> | <b>18</b> | <b>26</b> | <b>45</b> |

The number of times factors of influence were described in total; and the number of times factors were described as barrier, enabler or both.

**Table 4. Overview of factors – barriers and/or enablers – that influence nationwide upscaling of telemonitoring.**

| Domain                                                                                                                                                                                                                 | Contextual factors | Detailed description                                                                                                                                                                                    | Barrier, Enabler or Both | Number of times mentioned in publications |
|------------------------------------------------------------------------------------------------------------------------------------------------------------------------------------------------------------------------|--------------------|---------------------------------------------------------------------------------------------------------------------------------------------------------------------------------------------------------|--------------------------|-------------------------------------------|
| Context of diffusion                                                                                                                                                                                                   | Norms & Attitudes  | HCP think that patients become too dependent on technology <sup>4 8 12</sup>                                                                                                                            | Barrier                  | 4                                         |
|                                                                                                                                                                                                                        |                    | HCP have scepticism or reservations about TM <sup>9 12 16</sup>                                                                                                                                         | Barrier                  | 3                                         |
|                                                                                                                                                                                                                        |                    | There must be a perceived usefulness and usability of equipment <sup>4 8 12</sup>                                                                                                                       | Both                     | 3                                         |
|                                                                                                                                                                                                                        |                    | TM is convenient for patients <sup>8 12 19</sup>                                                                                                                                                        | Enabler                  | 3                                         |
|                                                                                                                                                                                                                        |                    | HCP have a positive attitude (towards usefulness, feasibility, potential) <sup>10 12 19</sup>                                                                                                           | Enabler                  | 3                                         |
|                                                                                                                                                                                                                        |                    | There is concern amongst HCP that acting on the TM data provided could lead to overtreatment <sup>8 12</sup>                                                                                            | Barrier                  | 2                                         |
|                                                                                                                                                                                                                        |                    | HCP consider use of TM relevant <sup>19</sup>                                                                                                                                                           | Enabler                  | 2                                         |
|                                                                                                                                                                                                                        |                    | HCP have high expectations of working with TM <sup>17</sup>                                                                                                                                             | Both                     | 2                                         |
|                                                                                                                                                                                                                        |                    | TM makes patients anxious <sup>8 12</sup>                                                                                                                                                               | Barrier                  | 2                                         |
|                                                                                                                                                                                                                        |                    | HCP think that TM can increase workload and make planning more difficult <sup>16 17</sup>                                                                                                               | Barrier                  | 2                                         |
|                                                                                                                                                                                                                        |                    | Make patients feel more empowered to take a pro-active approach to their health <sup>8</sup> or should be empowered to engage with technologies for self-management and self-care purposes <sup>5</sup> | Enabler                  | 2                                         |
|                                                                                                                                                                                                                        |                    | HCP perceive a shift to technology making medical decisions or support in medical decision making <sup>10 19</sup>                                                                                      | Both                     | 2                                         |
|                                                                                                                                                                                                                        |                    | Although the HCP had high perceptions and expectations of working with TM, these were not positively reflected in the actual experiences. <sup>17</sup>                                                 | Barrier                  | 1                                         |
|                                                                                                                                                                                                                        |                    | HCP expect to manage caseload more efficiently <sup>16</sup>                                                                                                                                            | Enabler                  | 1                                         |
|                                                                                                                                                                                                                        |                    | Change personal practice <sup>8</sup>                                                                                                                                                                   | Both                     | 1                                         |
|                                                                                                                                                                                                                        |                    | Concerns about the impact of telehealth on nursing roles <sup>16</sup>                                                                                                                                  | Barrier                  | 1                                         |
| HCP experience a lack of advantage <sup>9</sup>                                                                                                                                                                        | Barrier            | 1                                                                                                                                                                                                       |                          |                                           |
| HCP who have the knowledge and experience in TM, tend to have a less positive attitude compared with technical professionals, who might be driven by their greater enthusiasm for technology in general. <sup>10</sup> | Both               | 1                                                                                                                                                                                                       |                          |                                           |
| HCP think that TM is more expensive than conventional treatment <sup>10</sup>                                                                                                                                          | Barrier            | 1                                                                                                                                                                                                       |                          |                                           |
| Technical professionals are more confident about patient compliance than HCP <sup>10</sup>                                                                                                                             | Both               | 1                                                                                                                                                                                                       |                          |                                           |
| HCP concern about privacy protection <sup>10</sup>                                                                                                                                                                     | Barrier            | 1                                                                                                                                                                                                       |                          |                                           |



1  
2  
3  
4  
5  
6  
7  
8  
9  
10  
11  
12  
13  
14  
15  
16  
17  
18  
19  
20  
21  
22  
23  
24  
25  
26  
27  
28  
29  
30  
31  
32  
33  
34  
35  
36  
37  
38  
39  
40  
41  
42  
43  
44  
45  
46

|  |                                    |                                                                                                                                                                                                                                                               |         |   |
|--|------------------------------------|---------------------------------------------------------------------------------------------------------------------------------------------------------------------------------------------------------------------------------------------------------------|---------|---|
|  |                                    | HCP concern about the loss of control over the medical treatment <sup>10</sup>                                                                                                                                                                                | Barrier | 1 |
|  |                                    | HCP think that patient acceptance is a factor of influence <sup>19</sup>                                                                                                                                                                                      | Both    | 1 |
|  |                                    | Use of telehealth is an important new skill for HCP, as was the ability to understand trends in the management of long-term conditions <sup>12</sup>                                                                                                          | Enabler | 1 |
|  |                                    | HCP see TM as an opportunity for professional career development <sup>12</sup>                                                                                                                                                                                | Enabler | 1 |
|  |                                    | HCP consider "Our centre is innovative" <sup>1</sup>                                                                                                                                                                                                          | Enabler | 1 |
|  |                                    | Patients need to accept their old age and health condition, before they use TM <sup>4</sup>                                                                                                                                                                   | Both    | 1 |
|  |                                    | Reducing the level of face-to-face contact with the patients was a concern for professionals, but this concern was not universally shared by patients, some of whom experienced the non-face-to-face contact as additional and efficient input. <sup>8</sup>  | Enabler | 1 |
|  |                                    | HCP have concerns about the appropriateness of telehealth for the very severely ill <sup>12</sup>                                                                                                                                                             | Barrier | 1 |
|  |                                    | Early positive experiences and the sharing of success were identified as key enablers for staff acceptance. Early negative experiences of telehealth have a long-lasting impact on staff acceptance and the predominant view among participants <sup>16</sup> | Both    | 1 |
|  |                                    | HCP state that telemonitoring provides higher patient satisfaction (related to home-monitoring) and does not require hospital staff to visit patients at home <sup>18</sup>                                                                                   | Enabler | 1 |
|  | Organisational structure & process | Security and privacy aspects that influence implementation <sup>1 3 5 9 13 18</sup>                                                                                                                                                                           | Both    | 6 |
|  |                                    | Rules and protocols on the implementation of the system and responsibility for incoming data <sup>1 5 9 16 17</sup>                                                                                                                                           | Both    | 5 |
|  |                                    | Certain processes / coordination support implementation of TM <sup>9 13 16 17</sup>                                                                                                                                                                           | Both    | 4 |
|  |                                    | Use of TM enables clinical decision support and influence adoption of guidelines <sup>3 7 8</sup>                                                                                                                                                             | Enabler | 3 |
|  |                                    | Regular data sharing had a motivating effect on patients, as they were aware that at some point the readings may be reviewed <sup>8</sup> or is a possible limitation <sup>5</sup>                                                                            | Both    | 2 |
|  |                                    | A wide program of change management to support healthcare transformation and adoption of new working practices <sup>3 5</sup>                                                                                                                                 | Both    | 2 |
|  |                                    | Reduce admissions or readmissions <sup>1 17</sup>                                                                                                                                                                                                             | Enabler | 2 |
|  |                                    | Creating central databases making the transmitted data accessible to the treating physician and serving as data registries that benefit medical research <sup>3</sup>                                                                                         | Enabler | 1 |
|  |                                    | Set up appropriate vendor agreements and infrastructure <sup>3</sup>                                                                                                                                                                                          | Both    | 1 |
|  |                                    | Protocols on the acceptable length of time between the moment of incoming patient data and the response of the HCP(response-reaction time) <sup>17</sup>                                                                                                      | Both    | 1 |

|  |                       |                                                                                                                                                               |         |   |
|--|-----------------------|---------------------------------------------------------------------------------------------------------------------------------------------------------------|---------|---|
|  |                       | Difficult to obtain relevant data about patients and ensuring that relevant data – limited tailoring to individual patient - is shared with HCP <sup>16</sup> | Barrier | 1 |
|  |                       | Limited options for discharging patients who will benefit from continued use <sup>16</sup>                                                                    | Barrier | 1 |
|  |                       | Referral routes should be opened up for patients with other conditions and with less complex needs <sup>16</sup>                                              | Both    | 1 |
|  |                       | A changing environment is a barrier <sup>16</sup>                                                                                                             | Barrier | 1 |
|  |                       | The introduction (the way of communication, red.) to frontline staff influences implementation <sup>16</sup>                                                  | Both    | 1 |
|  |                       | Organisational size influences implementation of TM <sup>6</sup>                                                                                              | Both    | 1 |
|  | Resources             | Costs / financing of TM <sup>1 3 6 7 9 16-19</sup>                                                                                                            | Both    | 9 |
|  |                       | Knowledge of HCP / training of frontline staff <sup>1 3 5 9 13 16 17 19</sup>                                                                                 | Both    | 8 |
|  |                       | Reimbursement as an element of financial resources <sup>1 3 5 7 9 14 18 19</sup>                                                                              | Both    | 8 |
|  |                       | The TM-system access to the EMR / interfacing of technologies <sup>3 7 8 13 16 19</sup>                                                                       | Both    | 6 |
|  |                       | Design of telemonitoring system / usability <sup>4 5 7 8 13 19</sup>                                                                                          | Both    | 6 |
|  |                       | Availability of equipment <sup>1 9 16 19</sup>                                                                                                                | Both    | 5 |
|  |                       | Sufficient staffing <sup>5 7 9 13 19</sup>                                                                                                                    | Both    | 5 |
|  |                       | Time for implementation TM <sup>8 13 16</sup>                                                                                                                 | Both    | 5 |
|  |                       | Lack of evidence for TM <sup>1 3 5 7</sup>                                                                                                                    | Both    | 4 |
|  |                       | Engage stakeholders in system design <sup>5 13 16</sup>                                                                                                       | Both    | 4 |
|  |                       | (Lack of)Cloud acces, internet access or cellular access <sup>9 13 19</sup>                                                                                   | Both    | 3 |
|  |                       | Organisational readiness <sup>6 14</sup>                                                                                                                      | Both    | 2 |
|  |                       | Significant income disparities which impact the ability to enforce guidelines and advance adoption of TM <sup>3</sup>                                         | Barrier | 2 |
|  |                       | An externally resourced system for installation, technical support, maintenance and de-installation <sup>16 19</sup>                                          | Both    | 2 |
|  |                       | Local “champions” <sup>16</sup>                                                                                                                               | Both    | 1 |
|  |                       | Top management support <sup>5 6</sup>                                                                                                                         | Both    | 1 |
|  |                       | Staff to assume monitoring and management responsibilities for patients outside the hospital <sup>7</sup>                                                     | Both    | 1 |
|  |                       | On-boarding process to a TM project. <sup>19</sup>                                                                                                            | Both    | 1 |
|  |                       | (Patient)education to address concerns regarding the use of remote monitoring , specifically for older adults, as an enabler <sup>5</sup>                     | Enabler | 1 |
|  |                       | Assessment of added value should be calculated <sup>18</sup>                                                                                                  | Enabler | 1 |
|  | Policies & Incentives | Addressing security, social and ethical issues to enable implementation of TM <sup>3 9 13 18 19</sup>                                                         | Both    | 5 |

|  |                       |                                                                                                                                                                                     |         |   |
|--|-----------------------|-------------------------------------------------------------------------------------------------------------------------------------------------------------------------------------|---------|---|
|  |                       | A (lack of) vision of an organisation on implementing TM <sup>1 9 16</sup>                                                                                                          | Both    | 3 |
|  |                       | Worldwide, European and statelevel policies and legal and regulatory frameworks <sup>3 5 7</sup>                                                                                    | Both    | 3 |
|  |                       | New or adjusted workflows, care paths or data management <sup>3 8 19</sup>                                                                                                          | Both    | 3 |
|  |                       | Consensus statements and national guidelines <sup>2 3</sup>                                                                                                                         | Both    | 2 |
|  |                       | Reimbursement or alternative payment models as a financial incentive for organisations <sup>3 7</sup>                                                                               | Both    | 2 |
|  |                       | Target patients, volume of population, data load and work intensity within organisations <sup>9 16 19</sup>                                                                         | Both    | 3 |
|  |                       | Interoperability standards crucial to the success of scaling remote patient monitoring programs <sup>13</sup>                                                                       | Both    | 1 |
|  |                       | Policy and practice developments affecting health care services <sup>16</sup>                                                                                                       | Both    | 1 |
|  |                       | Importance of TM for health authorities <sup>1</sup>                                                                                                                                | Enabler | 1 |
|  | Networks & Linkages   | Collaboration non-profit or public-private organisations <sup>2 3 5 7 16</sup>                                                                                                      | Both    | 5 |
|  |                       | Not being able to collaborate with other hospitals or clinics and primary care providers <sup>9 13</sup>                                                                            | Barrier | 2 |
|  |                       | Professional organisations in collaboration with national societies can play an important role in catalysing reimbursement and adoption <sup>3</sup>                                | Enabler | 1 |
|  | Media & Change Agents | Advocates, early adopters and local champions enable implementation of TM <sup>3 16</sup>                                                                                           | Enabler | 2 |
|  |                       | Create (and increase) awareness in the general clinical community of the potential that remote monitoring has <sup>5 19</sup>                                                       | Enabler | 2 |
|  |                       | A standardized initiation video call to inform and instruct each participating centre <sup>19</sup>                                                                                 | Enabler | 1 |
|  |                       | (Lack of) guidelines from health care authorities <sup>1</sup>                                                                                                                      | Both    | 1 |
|  |                       | Device manufacturer that invest in TM <sup>3</sup>                                                                                                                                  | Enabler | 1 |
|  |                       | The dynamics in the COVID-19 pandemic may have impacted the use of TM <sup>19</sup>                                                                                                 | Enabler | 1 |
|  |                       | Consensus on the implementation and research agenda can pave the road to the widespread use of digital health services <sup>18</sup>                                                | Enabler | 1 |
|  |                       | A national repository could act as the first port of call where policy makers, clinicians and users could access information on remote monitoring projects <sup>5</sup>             | Enabler | 1 |
|  |                       | Information about strategies to educate and empower patients were provided <sup>19</sup>                                                                                            | Enabler | 1 |
|  |                       | Professional societies can review and potentially endorse TM applications that offer valuable decision support and empower the physician's relationship to the patient <sup>3</sup> | Enabler | 1 |

HCP= Health Care Professional, TM= Telemonitoring

**Table 5. The (expected) intervention outcomes when telemonitoring is implemented.**

| Domain                | Contextual factors             | Detailed description                                                           | Number of publications mentioned |
|-----------------------|--------------------------------|--------------------------------------------------------------------------------|----------------------------------|
| Intervention outcomes | Patient care & health outcomes | (improve) self-care or patient empowerment <sup>1 3 5 8 9 17</sup>             | 6                                |
|                       |                                | (improve) quality of care <sup>1 5 9 14 17</sup>                               | 4                                |
|                       |                                | (improve) patient education <sup>1 9 17</sup>                                  | 3                                |
|                       |                                | (improve) symptoms of disease <sup>9 17</sup>                                  | 2                                |
|                       |                                | (improve) quality of life <sup>3</sup>                                         | 1                                |
|                       | Organisation & System outcomes | Treat more patients (and reduce admission and visits) <sup>1 3 5 9 14 17</sup> | 5                                |
|                       |                                | (reduce) workload <sup>1 9 14 17</sup>                                         | 4                                |
|                       |                                | (reduce) costs <sup>1 3 9</sup>                                                | 3                                |
|                       |                                | (improve) adherence to guidelines <sup>1 17</sup>                              | 2                                |
|                       |                                | Contribute to continuity of care <sup>3</sup>                                  | 1                                |

### Appendix 1. Preliminary search

| Database               | Search syntax                                                                                                                                                                                                                                                                                                                                        | Results                                                                               |
|------------------------|------------------------------------------------------------------------------------------------------------------------------------------------------------------------------------------------------------------------------------------------------------------------------------------------------------------------------------------------------|---------------------------------------------------------------------------------------|
| Pubmed                 | ("Telemedicine"[Mesh] OR telemedicine[tiab] OR mhealth[tiab] OR m-health[tiab] OR ehealth[tiab] OR e-health[tiab]) AND ("Monitoring, Physiologic"[Mesh] OR "Monitoring, Ambulatory"[Mesh] OR telemonitor*[tiab]) AND ("Implementation Science"[Mesh] OR "Health Plan Implementation"[Mesh] AND scale up[tiab] OR implement*[tiab] OR adoption[tiab]) | 723 of which 156 meta-analysis or reviews. None relevant for upscaling telemonitoring |
| JBI Evidence Synthesis | Telemonitoring AND Implementation                                                                                                                                                                                                                                                                                                                    | 14 results, none relevant.                                                            |
| Open Science framework | Telemonitoring OR telemedicine                                                                                                                                                                                                                                                                                                                       | 29 registries, none about upscaling                                                   |
| Prospero database      | (telemonitoring [all fields] OR telemedicine [MeSH]) AND Implementation Science [MeSH] OR Regional Health Planning [MeSH] OR Health Plan Implementation [MeSH] OR Implementation [all fields]                                                                                                                                                        | 102 results, none relevant for upscaling telemonitoring.                              |

## Appendix 2. Search syntax

### Search syntax:

("Telemedicine"[Mesh] OR telemedicine[tiab] OR mhealth[tiab] OR m-health[tiab] OR ehealth[tiab] OR e-health[tiab] OR out-of-office[tiab])

AND

("Monitoring, Physiologic"[Mesh] OR "Monitoring, Ambulatory"[Mesh] OR monitor\*[tiab] OR telemonitor\*[tiab] OR health care[tiab] OR healthcare[tiab])

AND

("Implementation Science"[Mesh] OR "Health Plan Implementation"[Mesh])

AND

scale up[tiab] OR implement\*[tiab] OR adoption[tiab])

AND

("Health Policy"[Mesh] OR "Policy Making"[Mesh] OR "National Health Program "[Mesh] OR policy[tiab] OR survey\*[tiab] OR mapping[tiab])

**Appendix 3**

Framework of dissemination in health services intervention research. From: Mendel et al 2008, *Adm Policy Ment Health* (2008) 35:21–37. The red lined box indicates the focus in this scoping review.

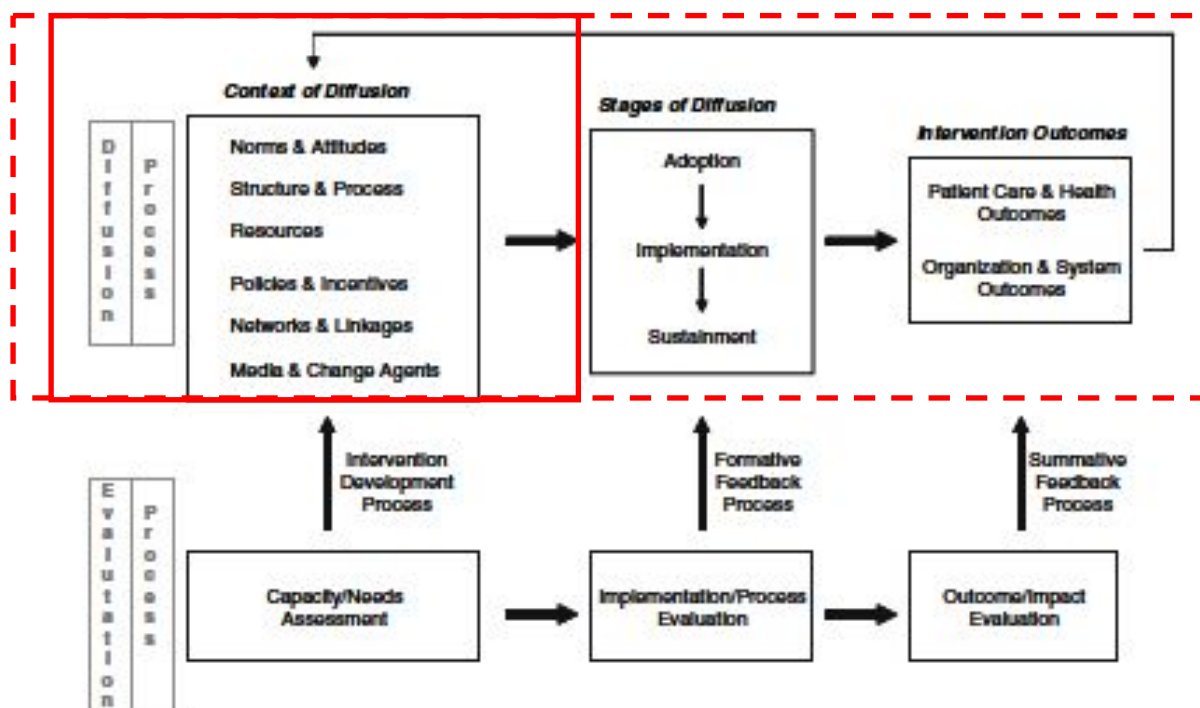

review only

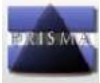

# PRISMA 2009 Checklist

1  
2  
3  
4  
5  
6  
7  
8  
9  
10  
11  
12  
13  
14  
15  
16  
17  
18  
19  
20  
21  
22  
23  
24  
25  
26  
27  
28  
29  
30  
31  
32  
33  
34  
35  
36  
37  
38  
39  
40  
41  
42  
43  
44  
45  
46  
47

| Section/topic                      | #  | Checklist item                                                                                                                                                                                                                                                                                              | Reported on page #        |
|------------------------------------|----|-------------------------------------------------------------------------------------------------------------------------------------------------------------------------------------------------------------------------------------------------------------------------------------------------------------|---------------------------|
| <b>TITLE</b>                       |    |                                                                                                                                                                                                                                                                                                             |                           |
| Title                              | 1  | Identify the report as a systematic review, meta-analysis, or both.                                                                                                                                                                                                                                         | 1                         |
| <b>ABSTRACT</b>                    |    |                                                                                                                                                                                                                                                                                                             |                           |
| Structured summary                 | 2  | Provide a structured summary including, as applicable: background; objectives; data sources; study eligibility criteria, participants, and interventions; study appraisal and synthesis methods; results; limitations; conclusions and implications of key findings; systematic review registration number. | 2                         |
| <b>INTRODUCTION</b>                |    |                                                                                                                                                                                                                                                                                                             |                           |
| Rationale                          | 3  | Describe the rationale for the review in the context of what is already known.                                                                                                                                                                                                                              | 4                         |
| Objectives                         | 4  | Provide an explicit statement of questions being addressed with reference to participants, interventions, comparisons, outcomes, and study design (PICOS).                                                                                                                                                  | 4                         |
| <b>METHODS</b>                     |    |                                                                                                                                                                                                                                                                                                             |                           |
| Protocol and registration          | 5  | Indicate if a review protocol exists, if and where it can be accessed (e.g., Web address), and, if available, provide registration information including registration number.                                                                                                                               | 5                         |
| Eligibility criteria               | 6  | Specify study characteristics (e.g., PICOS, length of follow-up) and report characteristics (e.g., years considered, language, publication status) used as criteria for eligibility, giving rationale.                                                                                                      | 5                         |
| Information sources                | 7  | Describe all information sources (e.g., databases with dates of coverage, contact with study authors to identify additional studies) in the search and date last searched.                                                                                                                                  | 5                         |
| Search                             | 8  | Present full electronic search strategy for at least one database, including any limits used, such that it could be repeated.                                                                                                                                                                               | Appendix 1 and Appendix 2 |
| Study selection                    | 9  | State the process for selecting studies (i.e., screening, eligibility, included in systematic review, and, if applicable, included in the meta-analysis).                                                                                                                                                   | 6                         |
| Data collection process            | 10 | Describe method of data extraction from reports (e.g., piloted forms, independently, in duplicate) and any processes for obtaining and confirming data from investigators.                                                                                                                                  | 6                         |
| Data items                         | 11 | List and define all variables for which data were sought (e.g., PICOS, funding sources) and any assumptions and simplifications made.                                                                                                                                                                       | 6                         |
| Risk of bias in individual studies | 12 | Describe methods used for assessing risk of bias of individual studies (including specification of whether this was done at the study or outcome level), and how this information is to be used in any data synthesis.                                                                                      | N/A                       |
| Summary measures                   | 13 | State the principal summary measures (e.g., risk ratio, difference in means).                                                                                                                                                                                                                               | 6                         |



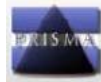

# PRISMA 2009 Checklist

|                      |    |                                                                                                                                                           |   |
|----------------------|----|-----------------------------------------------------------------------------------------------------------------------------------------------------------|---|
| Synthesis of results | 14 | Describe the methods of handling data and combining results of studies, if done, including measures of consistency (e.g., $I^2$ ) for each meta-analysis. | 6 |
|----------------------|----|-----------------------------------------------------------------------------------------------------------------------------------------------------------|---|

Page 1 of 2

| Section/topic                                                                                                                              | #  | Checklist item                                                                                                                                                                                           | Reported on page #                       |
|--------------------------------------------------------------------------------------------------------------------------------------------|----|----------------------------------------------------------------------------------------------------------------------------------------------------------------------------------------------------------|------------------------------------------|
| Risk of bias across studies                                                                                                                | 15 | Specify any assessment of risk of bias that may affect the cumulative evidence (e.g., publication bias, selective reporting within studies).                                                             | N/A                                      |
| Additional analyses                                                                                                                        | 16 | Describe methods of additional analyses (e.g., sensitivity or subgroup analyses, meta-regression), if done, indicating which were pre-specified.                                                         | N/A                                      |
| <b>RESULTS</b>                                                                                                                             |    |                                                                                                                                                                                                          |                                          |
| Study selection                                                                                                                            | 17 | Give numbers of studies screened, assessed for eligibility, and included in the review, with reasons for exclusions at each stage, ideally with a flow diagram.                                          | 7                                        |
| Study characteristics                                                                                                                      | 18 | For each study, present characteristics for which data were extracted (e.g., study size, PICOS, follow-up period) and provide the citations.                                                             | 7 & table 2                              |
| Risk of bias within studies                                                                                                                | 19 | Present data on risk of bias of each study and, if available, any outcome level assessment (see item 12).                                                                                                | N/A                                      |
| Results of individual studies                                                                                                              | 20 | For all outcomes considered (benefits or harms), present, for each study: (a) simple summary data for each intervention group (b) effect estimates and confidence intervals, ideally with a forest plot. | N/A                                      |
| Synthesis of results                                                                                                                       | 21 | Present results of each meta-analysis done, including confidence intervals and measures of consistency.                                                                                                  | 9 & Figure 2                             |
| Risk of bias across studies                                                                                                                | 22 | Present results of any assessment of risk of bias across studies (see Item 15).                                                                                                                          | N/A                                      |
| Additional analysis                                                                                                                        | 23 | Give results of additional analyses, if done (e.g., sensitivity or subgroup analyses, meta-regression [see Item 16]).                                                                                    | 9, 10, 11, 12, Table 3, Table 4, Table 5 |
| <b>DISCUSSION</b>                                                                                                                          |    |                                                                                                                                                                                                          |                                          |
| Summary of evidence                                                                                                                        | 24 | Summarize the main findings including the strength of evidence for each main outcome; consider their relevance to key groups (e.g., healthcare providers, users, and policy makers).                     | 12, 13                                   |
| Limitations                                                                                                                                | 25 | Discuss limitations at study and outcome level (e.g., risk of bias), and at review-level (e.g., incomplete retrieval of identified research, reporting bias).                                            | 14                                       |
| Conclusions                                                                                                                                | 26 | Provide a general interpretation of the results in the context of other evidence, and implications for future research.                                                                                  | 14                                       |
| <b>FUNDING</b>                                                                                                                             |    |                                                                                                                                                                                                          |                                          |
| For peer review only - <a href="http://bmjopen.bmj.com/site/about/guidelines.xhtml">http://bmjopen.bmj.com/site/about/guidelines.xhtml</a> |    |                                                                                                                                                                                                          |                                          |

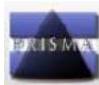

# PRISMA 2009 Checklist

1  
2  
3  
4  
5  
6  
7  
8  
9  
10  
11  
12  
13  
14  
15  
16  
17  
18  
19  
20  
21  
22  
23  
24  
25  
26  
27  
28  
29  
30  
31  
32  
33  
34  
35  
36  
37  
38  
39  
40  
41  
42  
43  
44  
45  
46  
47

|         |    |                                                                                                                                            |    |
|---------|----|--------------------------------------------------------------------------------------------------------------------------------------------|----|
| Funding | 27 | Describe sources of funding for the systematic review and other support (e.g., supply of data); role of funders for the systematic review. | 15 |
|---------|----|--------------------------------------------------------------------------------------------------------------------------------------------|----|

From: Moher D, Liberati A, Tetzlaff J, Altman DG, The PRISMA Group (2009). Preferred Reporting Items for Systematic Reviews and Meta-Analyses: The PRISMA Statement. PLoS Med 6(6): e1000097. doi:10.1371/journal.pmed1000097

For peer review only

# BMJ Open

## Enablers and barriers in upscaling telemonitoring across geographic boundaries: a scoping review

|                                 |                                                                                                                                                                                                                                                                                                                                                                                                                                                                                                                                                                                                                                                                                                                                               |
|---------------------------------|-----------------------------------------------------------------------------------------------------------------------------------------------------------------------------------------------------------------------------------------------------------------------------------------------------------------------------------------------------------------------------------------------------------------------------------------------------------------------------------------------------------------------------------------------------------------------------------------------------------------------------------------------------------------------------------------------------------------------------------------------|
| Journal:                        | <i>BMJ Open</i>                                                                                                                                                                                                                                                                                                                                                                                                                                                                                                                                                                                                                                                                                                                               |
| Manuscript ID                   | bmjopen-2021-057494.R1                                                                                                                                                                                                                                                                                                                                                                                                                                                                                                                                                                                                                                                                                                                        |
| Article Type:                   | Original research                                                                                                                                                                                                                                                                                                                                                                                                                                                                                                                                                                                                                                                                                                                             |
| Date Submitted by the Author:   | 16-Feb-2022                                                                                                                                                                                                                                                                                                                                                                                                                                                                                                                                                                                                                                                                                                                                   |
| Complete List of Authors:       | Gijsbers, Harm; Amsterdam UMC Locatie AMC, Department of Surgery, Amsterdam Gastroenterology and Metabolism; Amsterdam UMC Locatie AMC, Department of Rehabilitation<br>Feenstra, Tim M; Amsterdam UMC Locatie AMC, Department of surgery, Amsterdam Gastroenterology and Metabolism<br>Eminovic, Nina; Amsterdam UMC Locatie AMC, Department of Medical Informatics; Dutch Hospital Association<br>van Dam, Debora; University of Amsterdam, Department of surgery<br>Nurmohamed, S. Azam; Amsterdam UMC Locatie AMC, Department of Internal Medicine (Nephrology)<br>van de Belt, Tom; Radboudumc, Health innovations lab<br>Schijven, Marlies; Amsterdam UMC Locatie AMC, Department of Surgery, Amsterdam Gastroenterology and Metabolism |
| <b>Primary Subject Heading</b>: | Health informatics                                                                                                                                                                                                                                                                                                                                                                                                                                                                                                                                                                                                                                                                                                                            |
| Secondary Subject Heading:      | Diagnostics, Health policy                                                                                                                                                                                                                                                                                                                                                                                                                                                                                                                                                                                                                                                                                                                    |
| Keywords:                       | Change management < HEALTH SERVICES ADMINISTRATION & MANAGEMENT, Health informatics < BIOTECHNOLOGY & BIOINFORMATICS, Telemedicine < BIOTECHNOLOGY & BIOINFORMATICS                                                                                                                                                                                                                                                                                                                                                                                                                                                                                                                                                                           |
|                                 |                                                                                                                                                                                                                                                                                                                                                                                                                                                                                                                                                                                                                                                                                                                                               |

SCHOLARONE™  
Manuscripts

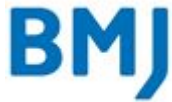

I, the Submitting Author has the right to grant and does grant on behalf of all authors of the Work (as defined in the below author licence), an exclusive licence and/or a non-exclusive licence for contributions from authors who are: i) UK Crown employees; ii) where BMJ has agreed a CC-BY licence shall apply, and/or iii) in accordance with the terms applicable for US Federal Government officers or employees acting as part of their official duties; on a worldwide, perpetual, irrevocable, royalty-free basis to BMJ Publishing Group Ltd ("BMJ") its licensees and where the relevant Journal is co-owned by BMJ to the co-owners of the Journal, to publish the Work in this journal and any other BMJ products and to exploit all rights, as set out in our [licence](#).

The Submitting Author accepts and understands that any supply made under these terms is made by BMJ to the Submitting Author unless you are acting as an employee on behalf of your employer or a postgraduate student of an affiliated institution which is paying any applicable article publishing charge ("APC") for Open Access articles. Where the Submitting Author wishes to make the Work available on an Open Access basis (and intends to pay the relevant APC), the terms of reuse of such Open Access shall be governed by a Creative Commons licence – details of these licences and which [Creative Commons](#) licence will apply to this Work are set out in our licence referred to above.

Other than as permitted in any relevant BMJ Author's Self Archiving Policies, I confirm this Work has not been accepted for publication elsewhere, is not being considered for publication elsewhere and does not duplicate material already published. I confirm all authors consent to publication of this Work and authorise the granting of this licence.

## Enablers and barriers in upscaling telemonitoring across geographic boundaries: a scoping review

H.J.H. Gijsbers, T.M. Feenstra, N. Eminovic, D. van Dam, S.A. Nurmohamed, T.H. van de Belt, M.P. Schijven\*

1. H.J.H. Gijsbers, [h.j.gijsbers@amsterdamumc.nl](mailto:h.j.gijsbers@amsterdamumc.nl) Department of Surgery, Amsterdam Gastroenterology and Metabolism, Amsterdam UMC, University of Amsterdam, the Netherlands. Department of Rehabilitation, Amsterdam UMC, University of Amsterdam, the Netherlands.
2. T.M. Feenstra, [tm.feenstra@amsterdamumc.nl](mailto:tm.feenstra@amsterdamumc.nl) Department of surgery, Amsterdam Gastroenterology and Metabolism, Amsterdam UMC, University of Amsterdam, the Netherlands
3. N. Eminovic, [n.eminovic@gmail.com](mailto:n.eminovic@gmail.com), Department of Medical Informatics, Amsterdam UMC, University of Amsterdam, The Netherlands, Currently working at Dutch Hospital Association, Utrecht, the Netherlands.
4. D. van Dam, [d.vandam@amsterdamumc.nl](mailto:d.vandam@amsterdamumc.nl) Department of Surgery, Amsterdam Gastroenterology and Metabolism, Amsterdam UMC, University of Amsterdam, the Netherlands
5. S.A. Nurmohamed, [sa.nurmohamed@amsterdamumc.nl](mailto:sa.nurmohamed@amsterdamumc.nl), Department of Internal Medicine (Nephrology), Amsterdam UMC, the Netherlands
6. T.H. van de Belt, [Tom.vandeBelt@radboudumc.nl](mailto:Tom.vandeBelt@radboudumc.nl), Health Innovation Labs, Radboudumc, the Netherlands.
7. M.P. Schijven, [m.p.schijven@amsterdamumc.nl](mailto:m.p.schijven@amsterdamumc.nl), Department of Surgery, Amsterdam Gastroenterology and Metabolism, Amsterdam UMC, University of Amsterdam, the Netherlands

\*corresponding author Amsterdam UMC, loc. AMC PO box 22660, 1100 DD Amsterdam Zuidoost, the Netherlands

**#title: 12**

**#words abstract: 325**

**#words body: 3520**

**#figures: 2**

**#tables: 5**

**#appendix: 3**

**#words references: 1485**

## Abstract

**Introduction and objective:** Telemonitoring is a method to monitor a person's vital functions via their physiological data at distance, using technology. Whilst pilot studies on the proposed benefits of telemonitoring show promising results, it appears challenging to implement telemonitoring on a larger scale. The aim of this scoping review is to identify the enablers and barriers for upscaling of telemonitoring across different settings and geographical boundaries in healthcare.

**Methods:** PubMed, EMBASE, Cinahl, Web of Science, ProQuest and IEEE databases were searched. Resulting outcomes were assessed by two independent reviewers. Studies were considered eligible if they focused on remote monitoring of patients' vital functions and data was transmitted digitally. Using scoping review methodology, selected studies were systematically assessed on their factors of influence on upscaling of telemonitoring.

**Results:** A total of 2298 titles and abstracts were screened and 19 articles were included for final analysis. This analysis revealed 89 relevant factors of influence: 26 were reported as enabler, 18 were reported as barrier and 45 factors were reported being both. The actual utilisation of telemonitoring varied widely across studies. The most frequently mentioned factors of influence are: resources such as costs or reimbursement, access or interface with electronic medical record and knowledge of frontline staff.

**Conclusion:** Successful upscaling of telemonitoring requires insight into its critical success factors, especially at an overarching national level. To futureproof and facilitate upscaling of telemonitoring it is recommended to use this type of technology in usual care and to find means for reimbursement early on. A wide program on change management, nationally or regionally coordinated, is key. Clear regulatory conditions and professional guidelines may further facilitate widespread adoption and use of telemonitoring. Future research should focus on converting the 'enablers and barriers' as identified by this review into a guideline supporting further nationwide upscaling of telemonitoring.

**Keywords:** telemonitoring, scoping review, upscaling, implementation, remote health monitoring, digital health, technology, e-health

## Article summary – strengths and limitations

- This scoping review uses a transparent methodological approach supported by the application of an established methodological framework.
- Narrowing down the definition of telemonitoring in the search is an important strength of study.
- The use of Mendel’s framework proved to be a good fit for categorizing the scoping review results.
- A second reviewer encoded a purposeful sample of all extracted text components. No significant differences were identified between the first and second reviewer.

## Introduction

Telemonitoring is the collection, transmission, evaluation, and communication of individual health data from a patient to their healthcare provider or extended care team from outside a hospital or clinical office (i.e., the patient's home) using personal health technologies including wireless devices, wearable sensors, implanted health monitors, smartphones, tablets and mobile apps.<sup>1</sup> Pilot studies show that use of telemonitoring supports self-management, for instance by offering direct feedback to the patient.<sup>2</sup> Furthermore, telemonitoring is believed to improve early detection of disease or clinical deterioration and thereby has the potential to reduce hospitalisation and mortality.<sup>2 3 4</sup> In addition, telemonitoring has the potential to monitor patients more frequently or even continuously. As such, use of telemonitoring could improve quality of care, reduce the amount of time a clinician ends up spending to manage patients and increases the frequency of monitoring without increasing workload on healthcare resources.<sup>5-8</sup> Devices with intelligent and reliable computing sensors in wearables, hand-held devices, (smart)phones and implants have become widely available. The World Health Organisation (WHO)<sup>9</sup>, the European Union (EU)<sup>10</sup>, national governments and other governing organisations promote use of such technology if proven to be valid, reliable and sustainable, attempting to facilitate care at a distance.<sup>11</sup> However, positive results from the aforementioned small pilot studies are difficult to replicate when telemonitoring initiatives are to be implemented on a larger scale.<sup>12 13</sup>

In this review, following the WHO definition, 'upscaling' of telemonitoring is defined as 'the expansion and replication of good practice of a telemonitoring project in more than one independent organisation or setting and across geographical boundaries'.<sup>14</sup>

In order to facilitate larger scale implementation of telemonitoring projects using personal health technologies, evidence is needed regarding the barriers and enablers for successful implementation. A preliminary literature search conducted on January 6 2020 in PubMed, JBI Evidence Synthesis, Open Science Framework registries and the PROSPERO database identified that no systematic reviews, meta-analyses, or scoping reviews on scaling up telemonitoring had been performed and that none were underway.(Appendix 1). Indeed, research in the field of telemonitoring is relatively new and lacks high quality and homogeneous studies on the scaling up of telemonitoring. The purpose is to identify factors of influence on scaling up. Therefore it was decided to perform a scoping review.<sup>15</sup> Scoping reviews are a form of knowledge synthesis that incorporate a range of study designs in order to provide a comprehensive summary.<sup>16</sup>



1  
2  
3 The aim of this scoping review is to identify current enablers and barriers for upscaling of  
4 telemonitoring across various healthcare settings in a structured manner.  
5  
6  
7

## 8 **Methods**

9

10 This scoping review was conducted in accordance with the JBI methodology guidance for scoping  
11 reviews, using the Preferred Reporting Items for Systematic Reviews and Meta-Analyses – Scoping  
12 Reviews (PRISMA-ScR) checklist, which is an extension of the PRISMA checklist.<sup>17 18</sup> The scoping  
13 review protocol was registered on March 29<sup>th</sup> 2021, via the Open Science Framework  
14 (<https://osf.io/mpq9g/>)  
15  
16  
17  
18

### 19 **Patient and public involvement**

20 Patients and/or the public were not directly involved in this study.  
21  
22  
23  
24

### 25 **Eligibility criteria**

26 Studies were eligible if they focussed on remote monitoring of patients' vital functions - such as  
27 blood pressure, pulse oximetry, temperature and heart rate - by care practitioners or centres, and  
28 the monitored data was transmitted digitally via (smart)phone, tablet or Internet. Studies had to  
29 describe the implementation or adoption of telemonitoring on a larger scale, for instance in more  
30 than one organisation, or in a larger geographical area (larger regions, provinces or nationwide).  
31 There were no restrictions on publication year and study design and only full-text publications were  
32 included.  
33  
34  
35  
36  
37  
38

39 Studies were restricted to humans, the English language and peer-reviewed publications. Therefore,  
40 ongoing studies, conference abstracts and posters were excluded. Studies reporting self-monitoring  
41 by patients only and studies that solely described the effect of telemonitoring but not the  
42 implementation or adoption were also excluded.  
43  
44  
45  
46  
47  
48

### 49 **Search strategy for Scoping Review**

50 The preliminary search identified appropriate keywords and MeSH-terms. Subsequently, a broad  
51 search strategy for Pubmed was formulated by three reviewers (HG, NE, MS) and a medical librarian,  
52 combining the identified keywords and MeSH-terms related to telemedicine, ehealth,  
53 (tele)monitoring, implementation and upscaling. No filters were applied in the final search strategy.  
54 The complete PubMed search strategy is outlined in Appendix 2 and was adapted for the other  
55 indexed databases. HG performed the literature search of PubMed, EMBASE, Cinahl, Web of Science,  
56  
57  
58  
59  
60

1  
2  
3 ProQuest and IEEE in January 2020 and updated the search on February 1<sup>st</sup> 2022. Included studies  
4 were cross-referenced to identify additional studies.  
5  
6  
7

### 8 **Data Extraction and Analysis**

9  
10 One reviewer (HG) removed duplicates and led the process of study screening and selection. Study  
11 selection was managed using the online reference manager Rayyan.<sup>19</sup> The search results were  
12 reviewed on two sequential levels. In the initial “title and abstract stage”, the article titles and  
13 abstracts were screened according to the inclusion and exclusion criteria independently by two  
14 researchers (HG and TF). The lists of included studies and summaries of the collected data  
15 constructed by the two researchers were compared. Any disagreements were resolved by discussion  
16 and involvement of a third researcher (DvD). In the second “full-text stage”, the remaining articles  
17 were examined to ensure that they met the inclusion criteria.  
18  
19  
20  
21  
22  
23  
24

25 Study characteristics were systematically extracted using a structured data collection form that  
26 included the following parameters: type of telemonitoring, study location, year of publication,  
27 research methods, patient characteristics, and outcome measures of adoption. The charted data was  
28 verified by a second reviewer (TF or DvD).  
29  
30  
31  
32

### 33 **Interpretation and analysis using Mendel’s framework**

34  
35 In addition to the extraction of study characteristics, text components from the included articles,  
36 relevant to the nationwide implementation of telemonitoring, were extracted by one of the  
37 researchers (HG). The extracted text components were uploaded into a qualitative analysis software  
38 program (MAXQDA Analytics Pro, VERBI Software, 2020), and coded to capture all relevant  
39 constructs. A second researcher encoded independently of the first researcher 25% of the articles,  
40 after which they verified their coding. If there were significant differences between the first and  
41 second researcher, the differences were discussed and the procedure repeated.  
42  
43  
44  
45  
46  
47

48 The structure of the analysis was based on Mendel’s framework for Building Evidence on  
49 Dissemination and Implementation in Health Services Research<sup>20</sup> (appendix 3). This framework  
50 supports the understanding and assessing of relevant contextual factors and dynamics affecting the  
51 dissemination, implementation, and sustainability of interventions within communities and  
52 healthcare settings. In this scoping review, the “diffusion process” items of Mendel’s framework  
53 were used to better understand and generalise the relevant contextual factors from different studies  
54 involved with nationwide upscaling of telemonitoring.  
55  
56  
57  
58  
59  
60

## Results

The search yielded 2927 records. After the removal of duplicates, 2298 titles and abstracts were screened for inclusion and exclusion. 2250 studies were excluded after title and abstract screening, leaving 48 articles for full-text screening. All numbers were used to create a flowchart (Figure 1). Additional details for the reasons of exclusion are presented in Table 1. Finally, a total of 19 articles were included for analysis, describing a variety of telemonitoring solutions.<sup>21-38</sup>

### Characteristics of studies

The general characteristics of the included studies are presented in Table 2. Eleven out of 19 articles described a survey<sup>21 22 25 28-30 33 34 36-38</sup>, four described focus group interviews<sup>27 31 35 39</sup>, three articles were narrative reviews<sup>24 26 32</sup>, and one article described the results of a workshop.<sup>40</sup> A total of 89 enabler or barrier factors were mentioned 202 times in 19 studies.

### Scale and utilisation of telemonitoring

The utilisation of telemonitoring was reported in 13 of the 19 studies. Reported utilisation varied widely from “not part of routine care, or not available as standard care” in Austria, Norway, Lithuania, the UK and Sweden, to “90% utilisation of tele-electrocardiography” in Brazil.<sup>21 22 28 33 35</sup>

There was significant heterogeneity of the definition of utilisation, which was reported as: number of patients that used telemonitoring<sup>32 36 37 39</sup>, percentages of actual use<sup>29</sup>, number of clinics that are engaged in telemonitoring<sup>24 36 37</sup>, number of hospitals offering telemonitoring for high-risk pregnancies<sup>38</sup>, number of projects in a country<sup>30</sup> and total recorded measurements.<sup>37</sup>

The percentages of the actual use of telemonitoring in patients with heart failure varied from 3% to 77%.<sup>25 29 37</sup> In Brazil, a telemonitoring system for the monitoring of heart rhythms with an electrocardiogram was implemented in 79 municipalities. This study showed a utilisation ratio higher than 90%.<sup>22</sup> In Denmark, all telemedicine projects are mapped to provide a national contemporary overview of telemedicine initiatives. Utilisation is reported by referring to a website on which 16 active telemonitoring projects are registered within the country at this moment.<sup>30 41</sup> The enablers and barriers for nationwide upscaling of telemonitoring were structured in three domains using Mendel’s framework: context of diffusion, stages of diffusion and intervention outcomes.

### What are the enablers and/or barriers for upscaling of telemonitoring?

Regarding the context of diffusion, the enablers and barriers retrieved were classified into six different categories of contextual factors: being an enabler, a barrier, or both according to Mendel's framework (Figure 2). Table 3 gives an overview of factors and supplementary table 1 describes barriers and/or enablers in more detail.

#### 1. Norms & Attitudes.

Primary physicians needed to adapt their standard procedures in order to make an efficient contribution to care using telemonitoring solutions, for example by using the patients' self-measurements instead of doctor's office in-house measurements.<sup>27</sup> Healthcare professionals or centres that are aware of the benefits have a more positive attitude regarding telemonitoring.<sup>29 31 37</sup> In two studies, healthcare professionals had high expectations of working with telemonitoring, as well as managing caseloads more efficiently.<sup>35 36</sup>

A common perceived barrier for professionals is that telehealth can increase workload and make planning work more difficult when responding to monitoring alerts.<sup>35</sup> Across different studies professionals shared the view that patients may become too dependent on the technology making it a clear barrier for the use of telemonitoring.<sup>27 31</sup> Some studies report scepticism or reservations concerning telemonitoring.<sup>21 31 35</sup>

Another important barrier for the diffusion of telemonitoring is the lack of awareness of the possibilities and opportunities for providing care using remote monitoring among both health care management and clinical staff.<sup>40</sup>

#### 2. Organisational Structure & Process.

Eleven studies reported on organisational items.<sup>21 24-28 32 35-37 40</sup> Adoption of telemonitoring requires an infrastructural investment that will take several years to implement and will involve a complete overhaul of existing practice, clinically, financially, and managerially.<sup>40</sup> An elaborate program of change management is described as an enabler in the upscaling and implementation of telemonitoring.<sup>24 40</sup> Change management is described as continuous evaluation and assessment in the refining of patient selection criteria for remote monitoring, and personalising care pathways.<sup>24</sup> Security and privacy aspects influence implementation.<sup>21 24 28 32 37</sup> Setting up appropriate vendor agreements and protocols is described as an enabler concerning responsibility for incoming data.<sup>21 24 28 35 36 40</sup>

#### 3. Resources.

1  
2  
3 Financial aspects of telemonitoring are described as an important factor in nine studies.<sup>21 24-26 28 35-37 40</sup>  
4 For example, a lack of financial resources is described as among the four most important barriers for  
5 the adoption of eHealth.<sup>25</sup> Six studies described reimbursement as a barrier for implementation of  
6 telemonitoring.<sup>21 24 26 28 33 40</sup> According to these studies a suitable reimbursement solution should be  
7 adopted to incentivise and engage all stakeholders and to drive the intended transformation of  
8 healthcare delivery. Along with the financial aspects, concern rises for the possible inability to access  
9 the telemonitoring system via the electronic medical records.<sup>27 32 35 37 40</sup> Also, a lack of interoperability  
10 generates new tasks to share telehealth data with other clinicians via electronic patient records. This  
11 also causes concerns whether the telehealth data entered in a patient's record are accurate and  
12 relevant. This makes interoperability standards crucial to the success of upscaling remote patient  
13 monitoring programs.<sup>32 40</sup>  
14  
15  
16  
17  
18  
19  
20  
21  
22

#### 23 *4. Policies & Incentives.*

24 Three studies indicate that policies governing telehealth may differ at the state level, which forms a  
25 barrier for implementation on interstate level.<sup>26 35 40</sup> On a national level, professional societies can  
26 issue guidelines to enable telemonitoring.<sup>22 24</sup> European and worldwide policies on innovation  
27 friendly, legal and regulatory frameworks may enable upscaling of telemonitoring.<sup>24 26 40</sup>  
28  
29  
30  
31  
32

#### 33 *5. Networks & Linkages.*

34 Four studies described non-profit or public-private collaborations as enablers for implementation of  
35 telemonitoring.<sup>24 26 28 32</sup>. For example, a role for professional organisations like the European Society  
36 of Cardiology (ESC) in collaboration with national societies is described in catalysing reimbursement  
37 and adoption of telemonitoring in cardiac diseases.<sup>24</sup> A national repository could act as the first port  
38 of call where policy makers, clinicians, and users could access information of remote monitoring  
39 projects.<sup>40</sup> Another approach could be an extended partnership between device companies and  
40 health care systems involving telemonitoring services.<sup>26</sup>  
41  
42  
43  
44  
45  
46

47 At a regional level, collaborative efforts may connect hospital and regional health executives to  
48 network leaders, focusing on adoption, scale, and spread of network monitoring solutions.

49 Collaboration between hospitals and primary care providers, within the Ontario Telemedicine  
50 Network, proved to be an important factor for the sustainability of a tele homecare program in  
51 Canada.<sup>28 32</sup>  
52  
53  
54

#### 55 *6. Media & Change Agents.*

56  
57  
58  
59  
60

1  
2  
3 Two studies described media and change agents as enablers for the implementation of  
4 telemonitoring. Advocates, early adopters and local champions are described as an important source  
5 of information and advice for the introduction of telemonitoring.<sup>24 35 37</sup>  
6  
7  
8  
9

### 10 **Stages of diffusion**

11 Enablers and barriers were reported not to be linked to an implementation stage nor to a specific  
12 stage of diffusion. However, based on the reported utilisation and phase of upscaling, it is possible to  
13 analyse what stage of diffusion a telemonitoring project is most likely to be in. Eight studies  
14 described telemonitoring in the stage of pre adoption.<sup>21 25-28 33 35 36</sup> Six studies described  
15 telemonitoring in the implementation stage.<sup>24 31 32 37 39</sup> Only two studies described telemonitoring  
16 projects in the phase of sustainment.<sup>22 32</sup> In three studies it was not possible to analyse the stage of  
17 diffusion.  
18  
19  
20  
21  
22  
23  
24  
25

### 26 **Intervention outcomes**

27 Enablers and barriers for implementation may affect outcomes for individuals in the community, as  
28 well as local organisations and systems of care. All the expected outcomes for implementation of  
29 telemonitoring are described in table 4.  
30  
31  
32  
33

34 *Patient Care & Health Outcomes.* Six studies reported outcomes on an individual level and in what  
35 way they were expected to be affected by telemonitoring. For example, implementation of  
36 telemonitoring was expected to improve self-care or patient empowerment.<sup>21 24 27 28 36 40</sup>  
37  
38  
39  
40

41 *Organisation & System Outcomes.*

42 Five studies reported on the expected outcomes on an organisational and system level. For example,  
43 when telemonitoring was implemented, it was expected that more patients could be treated, which  
44 would reduce admission and visits<sup>21 24 28 33 40</sup>, workload would be reduced<sup>21 28 33</sup> and costs would be  
45 reduced.<sup>21 24 28</sup>  
46  
47  
48  
49

### 50 **Discussion**

51 This scoping review provides insight into the enablers and/or barriers that affect upscaling of  
52 telemonitoring in healthcare across different settings. All included studies examined large scale  
53 adoption or implementation of telemonitoring. One study described an International and European  
54 scale up.<sup>37</sup> This review retrieves and identifies important overarching factors, relevant for nationwide  
55 upscaling.  
56  
57  
58  
59  
60

1  
2  
3  
4  
5 One of the most frequently mentioned factors of influence is “costs” or “reimbursement”. For  
6 example; providing an eHealth infrastructure for free throughout the project duration is a great  
7 enabler.<sup>37</sup> Reimbursement is mentioned as a solution - “a suitable reimbursement solution should be  
8 adopted”<sup>24</sup> – or as a barrier: “there is no financial backing to adopt new systems such as remote  
9 monitoring”.<sup>40</sup> Economic evaluations of eHealth applications are gaining momentum, and studies  
10 have shown considerable variation regarding the costs and benefits that they include.<sup>42</sup> Economic  
11 studies on telemonitoring in heart failure and women at risk of preeclampsia describe this duality.  
12 The initial cost of the telemonitoring equipment may be an obstacle to widespread use of  
13 telemonitoring. Although telemonitoring will require an initial financial investment, economic studies  
14 show substantially reduction of costs in the long term.<sup>43 44</sup> Costs, as a factor of influence, exist in  
15 coherence of “a lack of evidence”. In the absence of solid empirical evidence, key decision makers  
16 may doubt the effectiveness of eHealth, which, in turn, limits investment and its long-term  
17 integration into the mainstream health care system.<sup>45</sup> Exploring alternative payment models, for  
18 example “temporary” funding of telemonitoring by health insurers, could bridge that gap so that the  
19 necessary evidence can be collected.  
20  
21  
22  
23  
24  
25  
26  
27  
28  
29  
30

31 Over half of the factors identified are stated both as an enabler and a barrier. Therefore, factors of  
32 influence found in this scoping review can be used pragmatically; e.g. as a directive to check whether  
33 the factor is a barrier or an enabler in projects where upscaling is required. A relatively large number  
34 of factors are related to the “norms & attitudes” of users. Although this is an important factor for  
35 local implementation, one would expect that proportionately more context-related factors for  
36 nationwide scaling up would be found. Resources, attitudes, intrinsic motivation and behaviour of  
37 end-users, costs and technical knowledge of health care providers are all important factors of  
38 influence. These findings are consistent with reviews on implementation of other types of eHealth or  
39 telemedicine.<sup>13 46-49</sup>  
40  
41  
42  
43  
44  
45  
46  
47

48 The utilisation and upscaling of telemonitoring varied widely across settings and was not reported in  
49 30% of the included studies. Because adoption is not clearly defined in the studies it is not possible to  
50 interpret the enablers and barriers for each phase of adoption. In future studies, it is recommended  
51 to give a clear definition of adoption and to report utilisation. Only then is it possible to learn more  
52 about barriers and facilitators in various stages of implementation to scale up.  
53  
54  
55  
56  
57

58 Studies in this scoping review reported expected “patient care & health outcomes”. Outcomes were  
59 not correlated to certain enablers or barriers. Based on this scoping review it is not possible to draw  
60

1  
2  
3 conclusions regarding factors of upscaling influence the outcomes of care, nor which outcomes of  
4 care influence the upscaling. Although it would be useful to know more about upscaling of  
5 telemonitoring in relation to specific patients conditions, this study focused on the possible  
6 facilitators and barriers for (nation)wide upscaling regardless of patient conditions.  
7  
8  
9

### 10 11 *Practical implications*

12  
13 Based on the findings in this study, a coordinated and structured collaborative approach enables the  
14 upscaling of telemonitoring, embodying:

15  
16 A wide program on change management, including policies and protocols on adaption of healthcare  
17 processes; Implementation coordinators, who set up requirement specifications with particular  
18 attention to interoperability standards, telemonitoring access to electronic medical records, security  
19 and privacy aspects, and appropriate vendor agreements; Widespread marketing and recruitment  
20 initiatives, for example social media channels that enable the recruitment of participating centres;  
21 Collaboration among different hospitals and between primary care and hospitals, as a way to  
22 overcome organisational and regional differences and to create an economy of scale, and;  
23 New and innovative ways for reimbursement.  
24  
25  
26  
27  
28  
29  
30

31  
32 There was disagreement during the selection of studies that required discussion with a third  
33 reviewer. There are studies in which blood pressure is measured automatically at home. However,  
34 the data of these measurements were not exchanged electronically with the hospital in these  
35 studies. Studies investigating this form of home measurement have not been included in this scoping  
36 review. Narrowing down the definition of telemonitoring in the search is an important strength of  
37 study. A range of terms like “remote monitoring”, “teleconsultation”, “telehealth” or “telecare” is  
38 used interchangeably in the definition of telemonitoring. There are 23 different exclusion reasons for  
39 2015 exclusions due to the terminology of telemonitoring. (Table 1). For example; teleconsultation,  
40 video-consultation and remote monitoring by telephone calls are all described as telemonitoring and  
41 355 studies used “telemonitoring” as a keyword for a mobile health application without  
42 telemonitoring functionality. Using this precise definition of telemonitoring makes it possible to  
43 compare the results of this study with future studies on upscaling telemonitoring. Another strength  
44 of this study is the use of Mendel’s framework, which provided to be fit for categorizing the scoping  
45 review results on upscaling of telemonitoring across the included studies.  
46  
47  
48  
49  
50  
51  
52  
53  
54  
55

56  
57 This review analysed search results from four well-known research databases. It uses key terms  
58 registered with MeSH, and multiple reviewers determined the inclusion and exclusion criteria. A  
59 limitation to this study could be the coding of extracted text components by the second reviewer,  
60



1  
2  
3 who coded only a purposeful sample of all studies. However, no significant differences were  
4 identified between the first and second reviewer, therefore it is unlikely that this resulted in bias.  
5  
6  
7

8 Due to the large amount of heterogeneity in the included studies with regard to study design, types  
9 of telemonitoring, and measurement of adoption or utilisation, advice on how to scale up a  
10 telemonitoring project within countries has to be made carefully. For future research it is desirable to  
11 use a clear and narrow definition of telemonitoring, utilisation and outcome measures.  
12  
13  
14

### 15 16 **Conclusion and recommendations**

17 We live in a world where telemonitoring rapidly integrates into preventive and clinical care and well-  
18 being. Successful upscaling of telemonitoring requires insight into the factors of influence in  
19 adoption, especially at an overarching national level. To futureproof and facilitate upscaling of  
20 telemonitoring it is recommended to find means for reimbursement to use this type of technology in  
21 usual care and to explore alternative payment models early on. A wide program on change  
22 management, national or regional coordinated, is key. Clear regulatory conditions and professional  
23 guidelines may further facilitate widespread adoption and use of telemonitoring. The results of this  
24 study can be used to help develop a guideline for upscaling.  
25  
26  
27  
28  
29  
30  
31  
32  
33

34 **Acknowledgements** The authors wish to thank Ms. F.S. van Etten-Jamaludin, clinical librarian at the  
35 research support department of Amsterdam UMC, for her support searching the databases and Mrs  
36 Valerie Young, GradDipPhys, MSc, for her critical review on grammatical errors.  
37  
38  
39

40 **Contributorship statement** HG, NE, DvD and MS were involved with the design of the work. HG and  
41 TF did the screening of titles and abstracts to include studies. HG, TF and DvD extracted study  
42 characteristics. HG and DvD encode extracted text components. HG, TF, NE, DvD and MS prepared  
43 the original draft of the paper. SN, TvdB and MS contributed to the refinement of the paper. All  
44 authors have read and approved the final paper and agree to be accountable for all aspects of the  
45 work.  
46  
47  
48  
49

50  
51 **Competing interests** None declared.  
52  
53

54  
55 **Funding** The authors have not declared a specific grant for this research from any funding agency in  
56 the public, commercial or not-for-profit sectors.  
57  
58  
59  
60

1  
2  
3 **Data sharing statement** No additional data available  
4  
5

6 **Patient consent for publication** Not required.  
7

8 **Ethics approval** This study does not involve human participants.  
9

10 **Provenance and peer review** Not commissioned; externally peer reviewed.  
11  
12

### 13 **Figure legends**

14 **Figure 1.** PRISMA flowchart showing the process of including and excluding studies.  
15  
16

17 **Figure 2.** The number of enablers, barriers, or both regarding the context of diffusion according to  
18 Mendel's framework.  
19  
20  
21  
22  
23  
24  
25  
26  
27  
28  
29  
30  
31  
32  
33  
34  
35  
36  
37  
38  
39  
40  
41  
42  
43  
44  
45  
46  
47  
48  
49  
50  
51  
52  
53  
54  
55  
56  
57  
58  
59  
60

## References

1. ATA. ATA Telehealth: Defining 21st Century Care: American Telemedicine Association, 2020.
2. Farias FAC, Dagostini CM, Bicca YA, et al. Remote Patient Monitoring: A Systematic Review. *Telemed J E Health* 2019 doi: 10.1089/tmj.2019.0066 [published Online First: 2019/07/18]
3. Bashi N, Karunanithi M, Fatehi F, et al. Remote Monitoring of Patients With Heart Failure: An Overview of Systematic Reviews. *J Med Internet Res* 2017;19(1):e18. doi: 10.2196/jmir.6571 [published Online First: 2017/01/22]
4. Kitsiou S, Pare G, Jaana M. Effects of home telemonitoring interventions on patients with chronic heart failure: an overview of systematic reviews. *J Med Internet Res* 2015;17(3):e63. doi: 10.2196/jmir.4174 [published Online First: 2015/03/15]
5. Fazal N, Webb A, Bangoura J, et al. Telehealth: improving maternity services by modern technology. *BMJ Open Qual* 2020;9(4) doi: 10.1136/bmjopen-2019-000895 [published Online First: 2020/11/06]
6. Shah SS, Gvozdanovic A, Knight M, et al. Mobile App-Based Remote Patient Monitoring in Acute Medical Conditions: Prospective Feasibility Study Exploring Digital Health Solutions on Clinical Workload During the COVID Crisis. *JMIR Form Res* 2021;5(1):e23190. doi: 10.2196/23190 [published Online First: 2021/01/06]
7. Ong MK, Romano PS, Edgington S, et al. Effectiveness of Remote Patient Monitoring After Discharge of Hospitalized Patients With Heart Failure: The Better Effectiveness After Transition -- Heart Failure (BEAT-HF) Randomized Clinical Trial. *JAMA Intern Med* 2016;176(3):310-8. doi: 10.1001/jamainternmed.2015.7712 [published Online First: 2016/02/10]
8. Bodenheimer T, Sinsky C. From triple to quadruple aim: care of the patient requires care of the provider. *Annals of family medicine* 2014;12(6):573-6. doi: 10.1370/afm.1713 [published Online First: 2014/11/12]
9. Global diffusion of eHealth: making universal health coverage achievable. Report of the third global survey on eHealth Geneva: World Health Organization; 2016 [Available from: <https://www.who.int/publications/i/item/9789241511780>].
10. Communication from the commission to the European Parliament, the council, the European Economic and Social Committee and the Committee of the Regions on enabling the digital transformation of health and care in the Digital Single Market; empowering citizens and building a healthier society Brussels: European Commission; 2018 [cited European Commission. Available from: <https://ec.europa.eu/digital-single-market/en/news/communication-enabling-digital-transformation-health-and-care-digital-single-market-empowering> accessed 01-03 2021].
11. De juiste zorg op de juiste plek: Taskforce zorg op de juiste plek; 2018 [Available from: <https://www.rijksoverheid.nl/documenten/rapporten/2018/04/06/rapport-de-juiste-zorg-op-de-juiste-plek> accessed 01-03 2021].
12. Henderson C, Knapp M, Fernandez JL, et al. Cost effectiveness of telehealth for patients with long term conditions (Whole Systems Demonstrator telehealth questionnaire study): nested economic evaluation in a pragmatic, cluster randomised controlled trial. *Bmj* 2013;346(mar20 4):f1035-f35. doi: 10.1136/bmj.f1035
13. Ross J, Stevenson F, Lau R, et al. Factors that influence the implementation of e-health: a systematic review of systematic reviews (an update). *Implement Sci* 2016;11(1):146. doi: 10.1186/s13012-016-0510-7 [published Online First: 2016/10/27]
14. Scaling up projects and initiatives for better health: from concepts to practice WHO regional office for Europe 2016 [Available from: <https://www.euro.who.int/en/publications/abstracts/scaling-up-projects-and-initiatives-for-better-health-from-concepts-to-practice-2016#:~:text=Contact%20us,Scaling%20up%20projects%20and%20initiatives%20for%20better,from%20concepts%20to%20>

- 1  
2  
3 [20practice%20\(2016\)&text=Scaling%20up%20means%20expanding%20or,the%20effectiveness%20of%20an%20intervention](#). accessed 01-03 2021.
- 4  
5  
6 15. Munn Z, Peters MDJ, Stern C, et al. Systematic review or scoping review? Guidance for authors  
7 when choosing between a systematic or scoping review approach. *BMC medical research*  
8 *methodology* 2018;18(1):143. doi: 10.1186/s12874-018-0611-x [published Online First:  
9 2018/11/21]
- 10 16. Arksey H, O'Malley L. Scoping studies: towards a methodological framework. *International*  
11 *Journal of Social Research Methodology* 2005;8(1):19-32. doi:  
12 10.1080/1364557032000119616
- 13 17. Moher D, Liberati A, Tetzlaff J, et al. Preferred reporting items for systematic reviews and meta-  
14 analyses: the PRISMA statement. *PLoS medicine* 2009;6(7):e1000097. doi:  
15 10.1371/journal.pmed.1000097 [published Online First: 2009/07/22]
- 16 18. Peters MDJ, Marnie C, Tricco AC, et al. Updated methodological guidance for the conduct of  
17 scoping reviews. *JBI Evid Implement* 2021;19(1):3-10. doi: 10.1097/XEB.0000000000000277  
18 [published Online First: 2021/02/12]
- 19 19. Ouzzani M, Hammady H, Fedorowicz Z, et al. Rayyan-a web and mobile app for systematic  
20 reviews. *Systematic reviews* 2016;5(1):210. doi: 10.1186/s13643-016-0384-4 [published  
21 Online First: 2016/12/07]
- 22 20. Mendel P, Meredith LS, Schoenbaum M, et al. Interventions in organizational and community  
23 context: a framework for building evidence on dissemination and implementation in health  
24 services research. *Adm Policy Ment Health* 2008;35(1-2):21-37. doi: 10.1007/s10488-007-  
25 0144-9 [published Online First: 2007/11/09]
- 26 21. Aamodt IT, Lycholip E, Celutkiene J, et al. Health Care Professionals' Perceptions of Home  
27 Telemonitoring in Heart Failure Care: Cross-Sectional Survey. *J Med Internet Res*  
28 2019;21(2):e10362. doi: 10.2196/10362 [published Online First: 2019/02/07]
- 29 22. Alkmim MB, Silva CBG, Figueira RM, et al. Brazilian National Service of Telediagnosis in  
30 Electrocardiography. *Stud Health Technol Inform*;264:1635-36.
- 31 23. Cook DJ, Doolittle GC, Ferguson D, et al. Explaining the adoption of telemedicine services: an  
32 analysis of a paediatric telemedicine service. *J Telemed Telecare* 2002;8:106-7.
- 33 24. Chronaki CE, Vardas P. Remote monitoring costs, benefits, and reimbursement: a European  
34 perspective. *Europace*;15:i59-i64.
- 35 25. Faber S, van Geenhuizen M, de Reuver M. eHealth adoption factors in medical hospitals: A focus  
36 on the Netherlands. *Int J Med Inform* 2017;100:77-89. doi: 10.1016/j.ijmedinf.2017.01.009  
37 [published Online First: 2017/03/01]
- 38 26. Fraiche AM, Eapen ZJ, McClellan MB. Moving Beyond the Walls of the Clinic: Opportunities and  
39 Challenges to the Future of Telehealth in Heart Failure. *JACC Heart Fail*;5(4):297-304.
- 40 27. Hanley J, Pinnock H, Paterson M, et al. Implementing telemonitoring in primary care: learning  
41 from a large qualitative dataset gathered during a series of studies. *BMC Fam*  
42 *Pract*;19(1):118.
- 43 28. Kato NP, Johansson P, Okada I, et al. Heart Failure Telemonitoring in Japan and Sweden: A Cross-  
44 Sectional Survey. *J Med Internet Res* 2015;17(11):e258. doi: 10.2196/jmir.4825 [published  
45 Online First: 2015/11/15]
- 46 29. Klack L, Ziefle M, Wilkowska W, et al. Telemedical versus conventional heart patient monitoring: a  
47 survey study with German physicians. *Int J Technol Assess Health Care*;29(4):378-83.
- 48 30. Kristensen MBD, Hoiberg L, Nohr C. Updated Mapping of Telemedicine Projects in Denmark. *Stud*  
49 *Health Technol Inform* 2019;257:223-28.
- 50 31. MacNeill V, ers C, Fitzpatrick R, et al. Experiences of front-line health professionals in the delivery  
51 of telehealth: a qualitative study. *Br J Gen Pract*;64(624):e401-7.
- 52 32. McGillion MH, Duceppe E, Allan K, et al. Postoperative Remote Automated Monitoring: Need for  
53 and State of the Science. *Canadian Journal of Cardiology*;34(7):850-62.
- 54  
55  
56  
57  
58  
59  
60

- 1  
2  
3 33. Muigg D, Kastner P, Duftschmid G, et al. Readiness to use telemonitoring in diabetes care: a  
4 cross-sectional study among Austrian practitioners. *BMC Med Inform Decis Mak*  
5 2019;19(1):26. doi: 10.1186/s12911-019-0746-7 [published Online First: 2019/01/31]  
6  
7 34. Okazaki S, Castaneda JA, Sanz S. Clinicians' assessment of mobile monitoring: a comparative study  
8 in Japan and Spain. *Med 2 0;2(2):e11*.
- 9 35. Taylor J, Coates E, Brewster L, et al. Examining the use of telehealth in community nursing:  
10 identifying the factors affecting frontline staff acceptance and telehealth adoption. *J Adv*  
11 *Nurs;71(2):326-37*.
- 12 36. de Vries AE, van der Wal MH, Nieuwenhuis MM, et al. Health professionals' expectations versus  
13 experiences of internet-based telemonitoring: survey among heart failure clinics. *J Med*  
14 *Internet Res;15(1):e4*.
- 15 37. Gawalko M, Duncker D, Manninger M, et al. The European TeleCheck-AF project on remote app-  
16 based management of atrial fibrillation during the COVID-19 pandemic: centre and patient  
17 experiences. *Europace* 2021 doi: 10.1093/europace/euab050 [published Online First:  
18 2021/04/07]
- 19 38. van den Heuvel JFM, Ayubi S, Franx A, et al. Home-Based Monitoring and Telemonitoring of  
20 Complicated Pregnancies: Nationwide Cross-Sectional Survey of Current Practice in the  
21 Netherlands. *JMIR Mhealth Uhealth* 2020;8(10):e18966. doi: 10.2196/18966 [published  
22 Online First: 2020/10/29]
- 23 39. Cook EJ, hawa G, Sharp C, et al. Exploring the factors that influence the decision to adopt and  
24 engage with an integrated assistive telehealth and telecare service in Cambridgeshire, UK: a  
25 nested qualitative study of patient 'users' and 'non-users'. *BMC Health Serv Res;16:137*.
- 26 40. Diaz-Skeete Y, Giggins OM, McQuaid D, et al. Enablers and obstacles to implementing remote  
27 monitoring technology in cardiac care: A report from an interactive workshop. *Health*  
28 *informatics journal* 2019:1460458219892175. doi:  
29 <http://dx.doi.org/10.1177/1460458219892175>
- 30 41. MedCom. The Telemedicine Map [cited 2020 june 3rd]. Available from: [https://telemedicinsk-](https://telemedicinsk-landkort.dk)  
31 [landkort.dk](https://telemedicinsk-landkort.dk)
- 32 42. Sulz S, van Elten HJ, Askari M, et al. eHealth Applications to Support Independent Living of Older  
33 Persons: Scoping Review of Costs and Benefits Identified in Economic Evaluations. *J Med*  
34 *Internet Res* 2021;23(3):e24363. doi: 10.2196/24363 [published Online First: 2021/03/10]
- 35 43. van den Heuvel JFM, van Lieshout C, Franx A, et al. SAFE@HOME: Cost analysis of a new care  
36 pathway including a digital health platform for women at increased risk of preeclampsia.  
37 *Pregnancy Hypertens* 2021;24:118-23. doi: 10.1016/j.pregphy.2021.03.004 [published Online  
38 First: 2021/04/05]
- 39 44. Seto E. Cost comparison between telemonitoring and usual care of heart failure: a systematic  
40 review. *Telemed J E Health* 2008;14(7):679-86. doi: 10.1089/tmj.2007.0114 [published Online  
41 First: 2008/09/27]
- 42 45. Miller EA. Solving the disjuncture between research and practice: telehealth trends in the 21st  
43 century. *Health Policy* 2007;82(2):133-41. doi: 10.1016/j.healthpol.2006.09.011 [published  
44 Online First: 2006/10/19]
- 45 46. Simblett S, Greer B, Matcham F, et al. Barriers to and Facilitators of Engagement With Remote  
46 Measurement Technology for Managing Health: Systematic Review and Content Analysis of  
47 Findings. *J Med Internet Res* 2018;20(7):e10480. doi: 10.2196/10480 [published Online First:  
48 2018/07/14]
- 49 47. Varsi C, Solberg Nes L, Kristjansdottir OB, et al. Implementation Strategies to Enhance the  
50 Implementation of eHealth Programs for Patients With Chronic Illnesses: Realist Systematic  
51 Review. *J Med Internet Res* 2019;21(9):e14255. doi: 10.2196/14255 [published Online First:  
52 2019/10/02]
- 53 48. Ahmed B, Dannhauser T, Philip N. A systematic review of reviews to identify key research  
54 opportunities within the field of eHealth implementation. *J Telemed Telecare*  
55 2019;25(5):276-85. doi: 10.1177/1357633X18768601 [published Online First: 2018/04/29]  
56  
57  
58  
59  
60

1  
2  
3 49. Scott Kruse C, Karem P, Shifflett K, et al. Evaluating barriers to adopting telemedicine worldwide:  
4 A systematic review. *J Telemed Telecare* 2018;24(1):4-12. doi: 10.1177/13576333X16674087  
5 [published Online First: 2018/01/13]  
6  
7  
8  
9  
10  
11  
12  
13  
14  
15  
16  
17  
18  
19  
20  
21  
22  
23  
24  
25  
26  
27  
28  
29  
30  
31  
32  
33  
34  
35  
36  
37  
38  
39  
40  
41  
42  
43  
44  
45  
46  
47  
48  
49  
50  
51  
52  
53  
54  
55  
56  
57  
58  
59  
60

For peer review only

**Table 1 Reasons for exclusion.**

| # excluded |      | Reasons                                                                                                                                                                                                                                                                                                                                                                                                                                                                                                                                                                                                                                                                                                                                                                                                |
|------------|------|--------------------------------------------------------------------------------------------------------------------------------------------------------------------------------------------------------------------------------------------------------------------------------------------------------------------------------------------------------------------------------------------------------------------------------------------------------------------------------------------------------------------------------------------------------------------------------------------------------------------------------------------------------------------------------------------------------------------------------------------------------------------------------------------------------|
| 2279       | 2015 | Not describing telemonitoring as defined in the inclusion criteria; but described<br>569 teleconsultation<br>355 mHealth applications (without telemonitoring functionality)<br>251 health informatics topic in general<br>126 implementation of an EHR<br>105 e-mental health<br>61 lifestyle promotion<br>44 internet based therapy<br>23 tele-dermatology<br>22 tele-rehabilitation<br>19 e-prescription<br>18 addiction related<br>15 related to systems and technology<br>12 tele-ICU<br>12 smart home (care)<br>10 teledentistry<br>9 AI related<br>9 tele-ophtalmology<br>5 e-registries<br>5 teleradiology<br>5 blockchain<br>3 background articles<br>2 teleaudiology, 2 internet of things, 2 robotics, 1 RFID, 1 AR/VR<br>325 excluded for not describing telemonitoring with other reasons |
|            | 146  | articles described a telemonitoring or eHealth project, without describing implementation or adoption.                                                                                                                                                                                                                                                                                                                                                                                                                                                                                                                                                                                                                                                                                                 |
|            | 57   | Articles described telemonitoring implementation, but not in more than one independent organisation or setting and across geographical boundaries.                                                                                                                                                                                                                                                                                                                                                                                                                                                                                                                                                                                                                                                     |
|            | 26   | study protocol                                                                                                                                                                                                                                                                                                                                                                                                                                                                                                                                                                                                                                                                                                                                                                                         |
|            | 24   | opinion papers or interviews                                                                                                                                                                                                                                                                                                                                                                                                                                                                                                                                                                                                                                                                                                                                                                           |
|            | 15   | non-English                                                                                                                                                                                                                                                                                                                                                                                                                                                                                                                                                                                                                                                                                                                                                                                            |

EHR = Electronic Health Record, mHealth = mobile Health, RFID = Radio-frequency identification, tele-ICU = tele intensive care unit, AI = artificial intelligence, AR/VR = augmented reality / virtual reality.

Table 2 Study characteristics

| #  | Study and year                | Country              | Design                                 | Condition                                                          | Type of telemonitoring                                         | Analysis                                                | Outcome measures for adoption                                             |
|----|-------------------------------|----------------------|----------------------------------------|--------------------------------------------------------------------|----------------------------------------------------------------|---------------------------------------------------------|---------------------------------------------------------------------------|
| 1  | Aamodt 2019 <sup>21</sup>     | Norway and Lithuania | Cross-sectional survey                 | Heart failure care                                                 | Body weight, blood pressure, heart rate, dyspnea               | Summative content analysis                              | Reported as not part of routine care / standard care                      |
| 2  | Alkmim 2019 <sup>22</sup>     | Brazil               | Survey                                 | Cardiology                                                         | Tele-ECG                                                       | Descriptive statistics                                  | Utilisation >3dys per week                                                |
| 3  | Chronaki 2013 <sup>24</sup>   | Europe               | Narrative review                       | Diverse                                                            | Tele-ECG                                                       | N.a.                                                    | Health care costs + number of clinics engaging in TM                      |
| 4  | Cook 2016 <sup>39</sup>       | UK                   | Qualitative semi-structured interviews | COPD                                                               | Telehealth: Pulse oximetry, temperature, pulse, blood pressure | Framework method                                        | N.a.                                                                      |
| 5  | Diaz-Skeete <sup>40</sup>     | Republic of Ireland  | Workshop report                        | Cardiac care                                                       | n.a.                                                           | n.a.                                                    | n.a.                                                                      |
| 6  | Faber, 2017 <sup>25</sup>     | Netherlands          | Survey                                 | Heart failure + diabetes                                           | N.a.                                                           | Structured equation modelling approach                  | Extent of adoption in percentages                                         |
| 7  | Fraiche 2017 <sup>26</sup>    | US                   | Narrative review                       | Heart failure                                                      | Blood pressure, weight, ECG                                    | N.a.                                                    | N.a.                                                                      |
| 8  | Hanley 2018 <sup>27</sup>     | Scotland             | Qualitative interview + focus groups   | COPD, hypertension, BP after stroke, COPD, heart failure, diabetes | SpO2, BP, blood glucose,                                       | Interpretive description approach and thematic analysis | N.a.                                                                      |
| 9  | Kato 2015 <sup>28</sup>       | Japan and Sweden     | Cross-sectional survey                 | Heart failure                                                      | Monitoring physical condition and noticing a decline           | Descriptive analysis and content analysis methodology   | 4 domains<br>Reported as not part of routine care                         |
| 10 | Klack, 2013 <sup>29</sup>     | Germany              | Survey                                 | Heart patient                                                      | weight, temperature, blood pressure, coagulation               | Descriptive statistics                                  | Physician and engineers perspectives<br>Extent of adoption in percentages |
| 11 | Kristensen 2019 <sup>30</sup> | Denmark              | Email survey                           | Chronic heart failure, atrial                                      | Blood pressure, heart rhythm,                                  | Number of initiatives in                                | Number of projects                                                        |



|    |                                   |                 |                                        |                                                                                           |                                                                 |                              |                                                             |
|----|-----------------------------------|-----------------|----------------------------------------|-------------------------------------------------------------------------------------------|-----------------------------------------------------------------|------------------------------|-------------------------------------------------------------|
|    |                                   |                 |                                        | fibrillation, COPD, ADHD, Pregnant with complications, hypertension, patients with an ICD | body weight, heart rate, blood glucose,                         | interactive map online       | registered.                                                 |
| 12 | MacNeill, 2014 <sup>31</sup>      | UK              | Semi structured qualitative interviews | Chronic heart disease, COPD and diabetes                                                  | Blood pressure, weight, oxygen, blood glucose                   | Modified grounded theory     |                                                             |
| 13 | McGillion 2018 <sup>32</sup>      | Canada          | Narrative review                       | Surgical population                                                                       | Respiratory rate, blood pressure, heart rate, SpO2, temperature | N.a.                         | N.a.                                                        |
| 14 | Muigg, 2019 <sup>33</sup>         | Austria         | Cross-sectional survey                 | Diabetes                                                                                  | Blood pressure and blood glucose                                | Qualitative content analysis | Reported as not part of routine care                        |
| 15 | Okazaki, 2013 <sup>34</sup>       | Japan and Spain | Survey                                 | Not specified                                                                             | Not specified                                                   | Causal modeling              | n.a.                                                        |
| 16 | Taylor, 2014 <sup>35</sup>        | UK              | Qualitative interviews                 | COPD and Chronic heart failure                                                            | Not specified                                                   | Thematic analysis            | n.a.                                                        |
| 17 | de Vries, 2013 <sup>36</sup>      | Netherlands     | Survey                                 | Heart failure                                                                             | Blood pressure, weight, heart frequency, ECG                    | Descriptive statistics       | Usage                                                       |
| 18 | Van den Heuvel <sup>38</sup> 2020 | Netherlands     | Survey                                 | Women with pregnancy complications                                                        | Cardiotocography                                                | Descriptive statistics       | Provision of telemonitoring and perspectives of respondents |
| 19 | Gawalko <sup>37</sup> 2021        | Europe          | Survey                                 | Management of atrial fibrillation                                                         | Remote PPG or 1-lead ECG                                        | Descriptive statistics       | Centre experience and patient experience.                   |

n.a. = not available

**Table 3. An overview of factors, classified by the “diffusion process” items of Mendel’s framework**

|                          | #Factors  | #Described | #Barriers | #Enablers | #Both     |
|--------------------------|-----------|------------|-----------|-----------|-----------|
| 1. Norms & Attitudes     | 31        | 51         | 12        | 10        | 9         |
| 2. Structure & Process   | 16        | 33         | 3         | 3         | 10        |
| 3. Resources             | 19        | 75         | 2         | 2         | 15        |
| 4. Policies & Incentives | 10        | 23         | 0         | 1         | 9         |
| 5. Networks & Linkages   | 3         | 8          | 1         | 1         | 1         |
| 6. Media & Change agents | 10        | 12         | 0         | 9         | 1         |
| <b>Total</b>             | <b>89</b> | <b>202</b> | <b>18</b> | <b>26</b> | <b>45</b> |

The number of times factors of influence were described in total; and the number of times factors were described as barrier, enabler or both.

**Table 4. The (expected) intervention outcomes when telemonitoring is implemented.**

| Domain                | Contextual factors             | Detailed description                                                               | Number of publications mentioned |
|-----------------------|--------------------------------|------------------------------------------------------------------------------------|----------------------------------|
| Intervention outcomes | Patient care & health outcomes | (improve) self-care or patient empowerment <sup>21 24 27 28 36 40</sup>            | 6                                |
|                       |                                | (improve) quality of care <sup>21 28 33 36 40</sup>                                | 4                                |
|                       |                                | (improve) patient education <sup>21 28 36</sup>                                    | 3                                |
|                       |                                | (improve) symptoms of disease <sup>28 36</sup>                                     | 2                                |
|                       |                                | (improve) quality of life <sup>24</sup>                                            | 1                                |
|                       | Organisation & System outcomes | Treat more patients (and reduce admission and visits) <sup>21 24 28 33 36 40</sup> | 5                                |
|                       |                                | (reduce) workload <sup>21 28 33 36</sup>                                           | 4                                |
|                       |                                | (reduce) costs <sup>21 24 28</sup>                                                 | 3                                |
|                       |                                | (improve) adherence to guidelines <sup>21 36</sup>                                 | 2                                |
|                       |                                | Contribute to continuity of care <sup>24</sup>                                     | 1                                |

Figure 1 PRISMA flowchart showing the process of including and excluding studies.

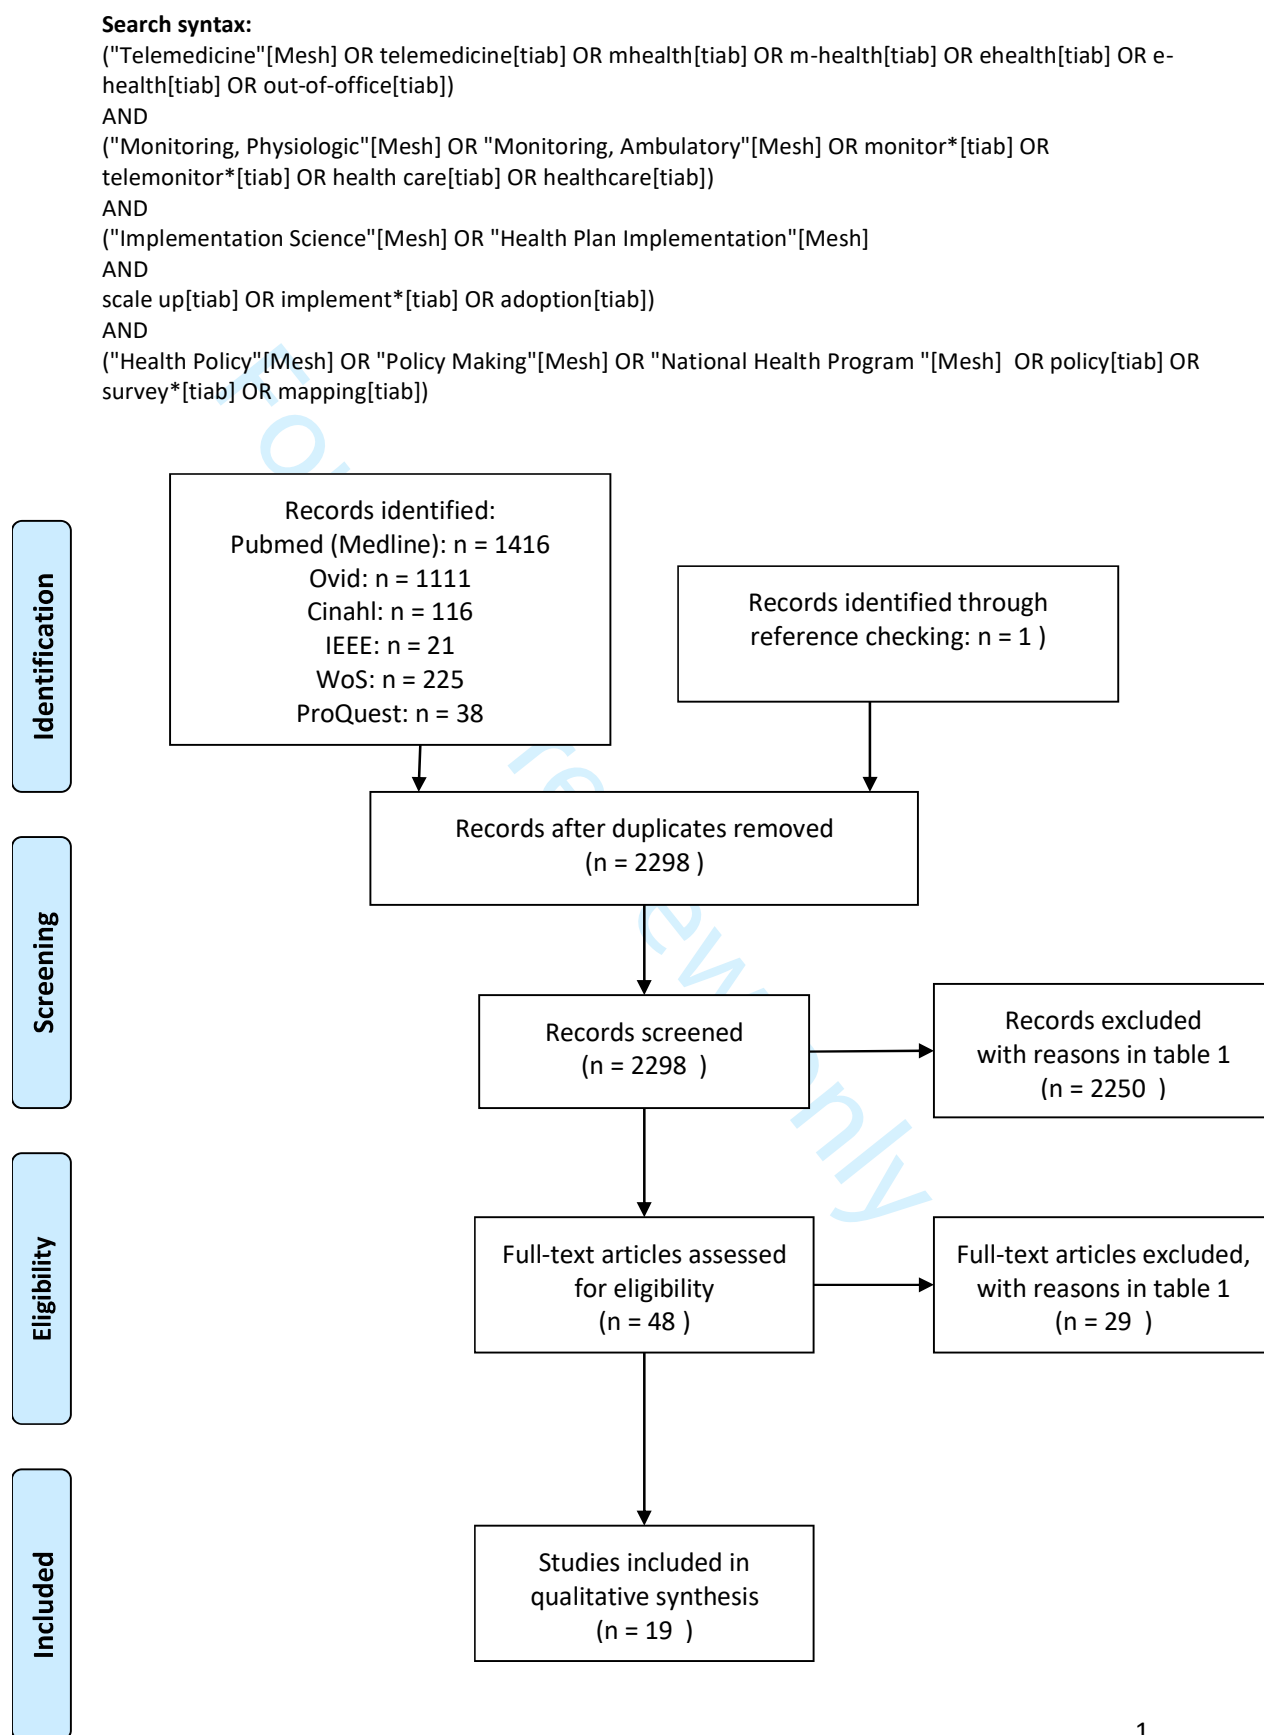

### Number of factors that influence upscaling

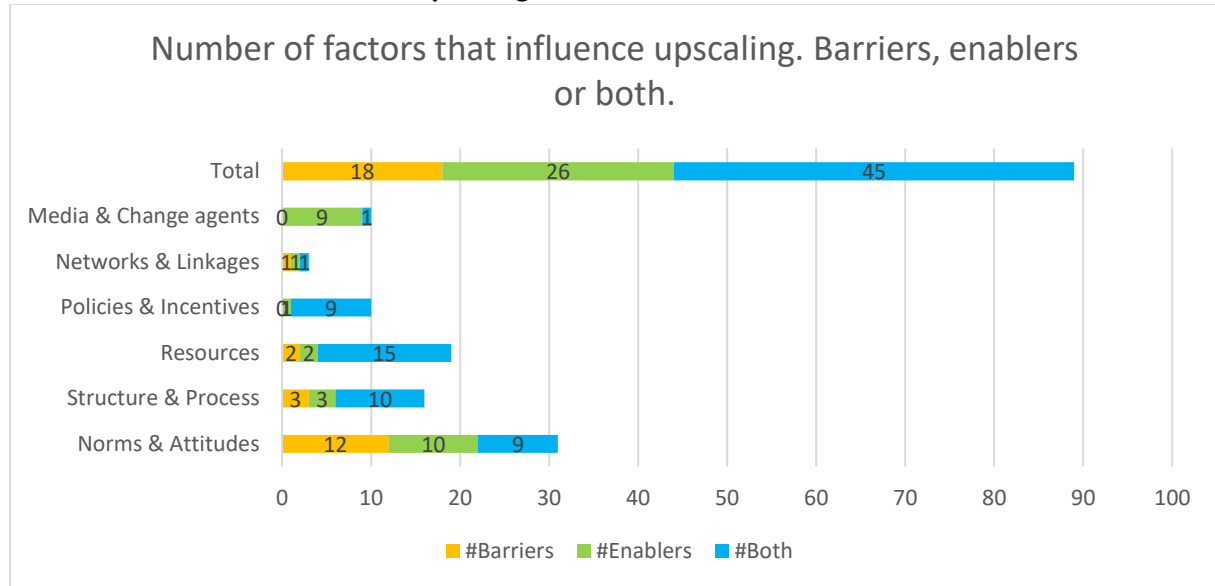

Figure 2. The number of enablers, barriers, or both regarding the context of diffusion according to Mendel's framework.

**Supplementary Table 1. Overview of factors – enablers and/or barriers – that influence nationwide upscaling of telemonitoring.**

| Domain                                                                 | Contextual factors | Detailed description                                                                                                                                                                                     | Barrier, Enabler or Both | Number of times mentioned in publications |
|------------------------------------------------------------------------|--------------------|----------------------------------------------------------------------------------------------------------------------------------------------------------------------------------------------------------|--------------------------|-------------------------------------------|
| Context of diffusion                                                   | Norms & Attitudes  | HCP think that patients become too dependent on technology <sup>27 31 39</sup>                                                                                                                           | Barrier                  | 4                                         |
|                                                                        |                    | HCP have scepticism or reservations about TM <sup>28 31 35</sup>                                                                                                                                         | Barrier                  | 3                                         |
|                                                                        |                    | There must be a perceived usefulness and usability of equipment <sup>27 31 39</sup>                                                                                                                      | Both                     | 3                                         |
|                                                                        |                    | TM is convenient for patients <sup>27 31 37</sup>                                                                                                                                                        | Enabler                  | 3                                         |
|                                                                        |                    | HCP have a positive attitude (towards usefulness, feasibility, potential) <sup>29 31 37</sup>                                                                                                            | Enabler                  | 3                                         |
|                                                                        |                    | There is concern amongst HCP that acting on the TM data provided could lead to overtreatment <sup>27 31</sup>                                                                                            | Barrier                  | 2                                         |
|                                                                        |                    | HCP consider use of TM relevant <sup>21 28</sup>                                                                                                                                                         | Enabler                  | 2                                         |
|                                                                        |                    | HCP have high expectations of working with TM <sup>36</sup>                                                                                                                                              | Both                     | 2                                         |
|                                                                        |                    | TM makes patients anxious <sup>27 31</sup>                                                                                                                                                               | Barrier                  | 2                                         |
|                                                                        |                    | HCP think that TM can increase workload and make planning more difficult <sup>35 36</sup>                                                                                                                | Barrier                  | 2                                         |
|                                                                        |                    | Make patients feel more empowered to take a pro-active approach to their health <sup>27</sup> or should be empowered to engage with technologies for selfmanagement and self-care purposes <sup>40</sup> | Enabler                  | 2                                         |
|                                                                        |                    | HCP perceive a shift to technology making medical decisions or support in medical decision making <sup>29 37</sup>                                                                                       | Both                     | 2                                         |
|                                                                        |                    | Although the HCP had high perceptions and expectations of working with TM, these were not positively reflected in the actual experiences. <sup>36</sup>                                                  | Barrier                  | 1                                         |
|                                                                        |                    | HCP expect to manage caseload more efficiently <sup>35</sup>                                                                                                                                             | Enabler                  | 1                                         |
|                                                                        |                    | Change personal practice <sup>27</sup>                                                                                                                                                                   | Both                     | 1                                         |
| Concerns about the impact of telehealth on nursing roles <sup>35</sup> | Barrier            | 1                                                                                                                                                                                                        |                          |                                           |
| HCP experience a lack of advantage <sup>28</sup>                       | Barrier            | 1                                                                                                                                                                                                        |                          |                                           |

|  |                                    |                                                                                                                                                                                                                                                               |         |   |
|--|------------------------------------|---------------------------------------------------------------------------------------------------------------------------------------------------------------------------------------------------------------------------------------------------------------|---------|---|
|  |                                    | HCP who have the knowledge and experience in TM, tend to have a less positive attitude compared with technical professionals, who might be driven by their greater enthusiasm for technology in general. <sup>29</sup>                                        | Both    | 1 |
|  |                                    | HCP think that TM is more expensive than conventional treatment <sup>29</sup>                                                                                                                                                                                 | Barrier | 1 |
|  |                                    | Technical professionals are more confident about patient compliance than HCP <sup>29</sup>                                                                                                                                                                    | Both    | 1 |
|  |                                    | HCP concern about privacy protection <sup>29</sup>                                                                                                                                                                                                            | Barrier | 1 |
|  |                                    | HCP concern about the loss of control over the medical treatment <sup>29</sup>                                                                                                                                                                                | Barrier | 1 |
|  |                                    | HCP think that patient acceptance is a factor of influence <sup>37</sup>                                                                                                                                                                                      | Both    | 1 |
|  |                                    | Use of telehealth is an important new skill for HCP, as was the ability to understand trends in the management of long-term conditions <sup>31</sup>                                                                                                          | Enabler | 1 |
|  |                                    | HCP see TM as an opportunity for professional career development <sup>31</sup>                                                                                                                                                                                | Enabler | 1 |
|  |                                    | HCP consider "Our centre is innovative" <sup>21</sup>                                                                                                                                                                                                         | Enabler | 1 |
|  |                                    | Patients need to accept their old age and health condition, before they use TM <sup>39</sup>                                                                                                                                                                  | Both    | 1 |
|  |                                    | Reducing the level of face-to-face contact with the patients was a concern for professionals, but this concern was not universally shared by patients, some of whom experienced the non-face-to-face contact as additional and efficient input. <sup>27</sup> | Enabler | 1 |
|  |                                    | HCP have concerns about the appropriateness of telehealth for the very severely ill <sup>31</sup>                                                                                                                                                             | Barrier | 1 |
|  |                                    | Early positive experiences and the sharing of success were identified as key enablers for staff acceptance. Early negative experiences of telehealth have a long-lasting impact on staff acceptance and the predominant view among participants <sup>35</sup> | Both    | 1 |
|  |                                    | HCP state that telemonitoring provides higher patient satisfaction (related to home-monitoring) and does not require hospital staff to visit patients at home <sup>38</sup>                                                                                   | Enabler | 1 |
|  | Organisational structure & process | Security and privacy aspects that influence implementation <sup>21 24 28 32 38 40</sup>                                                                                                                                                                       | Both    | 6 |
|  |                                    | Rules and protocols on the implementation of the system and responsibility for incoming data <sup>21 28 35 36 40</sup>                                                                                                                                        | Both    | 5 |
|  |                                    | Certain processes / coordination support implementation of TM <sup>28 32 35 36</sup>                                                                                                                                                                          | Both    | 4 |

1  
2  
3  
4  
5  
6  
7  
8  
9  
10  
11  
12  
13  
14  
15  
16  
17  
18  
19  
20  
21  
22  
23  
24  
25  
26  
27  
28  
29  
30  
31  
32  
33  
34  
35  
36  
37  
38  
39  
40  
41  
42  
43  
44  
45  
46

|  |                                                                                                                                                                                      |         |   |
|--|--------------------------------------------------------------------------------------------------------------------------------------------------------------------------------------|---------|---|
|  | Use of TM enables clinical decision support and influence adoption of guidelines<br><small>24 26 27</small>                                                                          | Enabler | 3 |
|  | Regular data sharing had a motivating effect on patients, as they were aware that at some point the readings may be reviewed <sup>27</sup> or is a possible limitation <sup>40</sup> | Both    | 2 |
|  | A wide program of change management to support healthcare transformation and adoption of new working practices <sup>24 40</sup>                                                      | Both    | 2 |
|  | Reduce admissions or readmissions <sup>21 36</sup>                                                                                                                                   | Enabler | 2 |
|  | Creating central databases making the transmitted data accessible to the treating physician and serving as data registries that benefit medical research <sup>24</sup>               | Enabler | 1 |
|  | Set up appropriate vendor agreements and infrastructure <sup>24</sup>                                                                                                                | Both    | 1 |
|  | Protocols on the acceptable length of time between the moment of incoming patient data and the response of the HCP(response-reaction time) <sup>36</sup>                             | Both    | 1 |
|  | Difficult to obtain relevant data about patients and ensuring that relevant data –                                                                                                   | Barrier | 1 |

|           |                                                                                                                  |         |   |
|-----------|------------------------------------------------------------------------------------------------------------------|---------|---|
|           | limited tailoring to individual patient - is shared with HCP <sup>35</sup>                                       |         |   |
|           | Limited options for discharging patients who will benefit from continued use <sup>35</sup>                       | Barrier | 1 |
|           | Referral routes should be opened up for patients with other conditions and with less complex needs <sup>35</sup> | Both    | 1 |
|           | A changing environment is a barrier <sup>35</sup>                                                                | Barrier | 1 |
|           | The introduction (the way of communication, red.) to frontline staff influences implementation <sup>35</sup>     | Both    | 1 |
|           | Organisational size influences implementation of TM <sup>25</sup>                                                | Both    | 1 |
| Resources | Costs / financing of TM <sup>21 24-26 28 35-38</sup>                                                             | Both    | 9 |
|           | Knowledge of HCP / training of frontline staff <sup>21 24 28 32 35-37 40</sup>                                   | Both    | 8 |
|           | Reimbursement as an element of financial resources <sup>21 24 26 28 33 37 38 40</sup>                            | Both    | 8 |
|           | The TM-system access to the EMR / interfacing of technologies <sup>24 26 27 32 35 37</sup>                       | Both    | 6 |
|           | Design of telemonitoring system / usability <sup>26 27 32 37 39 40</sup>                                         | Both    | 6 |
|           | Availability of equipment <sup>21 28 35 37</sup>                                                                 | Both    | 5 |
|           | Sufficient staffing <sup>26 28 32 37 40</sup>                                                                    | Both    | 5 |

|                       |                                                                                                                                            |         |   |
|-----------------------|--------------------------------------------------------------------------------------------------------------------------------------------|---------|---|
|                       | Time for implementation TM <sup>27 32 35</sup>                                                                                             | Both    | 5 |
|                       | Lack of evidence for TM <sup>21 24 26 40</sup>                                                                                             | Both    | 4 |
|                       | Engage stakeholders in system design <sup>32 35 40</sup>                                                                                   | Both    | 4 |
|                       | (Lack of)Cloud acces, internet access or cellular access <sup>28 32 37</sup>                                                               | Both    | 3 |
|                       | Organisational readiness <sup>25 33</sup>                                                                                                  | Both    | 2 |
|                       | Significant income disparities which impact the ability to enforce guidelines and advance adoption of TM <sup>24</sup>                     | Barrier | 2 |
|                       | An externally resourced system for installation, technical support, maintenance and de-installation <sup>35 37</sup>                       | Both    | 2 |
|                       | Local "champions" <sup>35</sup>                                                                                                            | Both    | 1 |
|                       | Top management support <sup>25 40</sup>                                                                                                    | Both    | 1 |
|                       | Staff to assume monitoring and management responsibilities for patients outside the hospital <sup>26</sup>                                 | Both    | 1 |
|                       | On-boarding process to a TM project. <sup>37</sup>                                                                                         | Both    | 1 |
|                       | (Patient)education to address concerns regarding the use of remote monitoring , specifically for older adults, as an enabler <sup>40</sup> | Enabler | 1 |
|                       | Assessment of added value should be calculated <sup>38</sup>                                                                               | Enabler | 1 |
| Policies & Incentives | Addressing security, social and ethical issues to enable implementation of TM <sup>24 28 32 37 38</sup>                                    | Both    | 5 |
|                       | A (lack of) vision of an organisation on implementing TM <sup>21 28 35</sup>                                                               | Both    | 3 |
|                       | Worldwide, European and statelevel policies and legal and regulatory frameworks <sup>24 26 40</sup>                                        | Both    | 3 |
|                       | New or adjusted workflows, care paths or data management <sup>24 27 37</sup>                                                               | Both    | 3 |
|                       | Consensus statements and national guidelines <sup>22 24</sup>                                                                              | Both    | 2 |
|                       | Reimbursement or alternative payment models as a financial incentive for organisations <sup>24 26</sup>                                    | Both    | 2 |
|                       | Target patients, volume of population, data load and work intensity within organisations <sup>28 35 37</sup>                               | Both    | 3 |
|                       | Interoperability standards crucial to the success of scaling remote patient monitoring programs <sup>32</sup>                              | Both    | 1 |



|  |                                                                                                                                                                                      |                                                                                                                                                                          |         |   |
|--|--------------------------------------------------------------------------------------------------------------------------------------------------------------------------------------|--------------------------------------------------------------------------------------------------------------------------------------------------------------------------|---------|---|
|  |                                                                                                                                                                                      | Policy and practice developments affecting health care services <sup>35</sup>                                                                                            | Both    | 1 |
|  |                                                                                                                                                                                      | Importance of TM for health authorities <sup>21</sup>                                                                                                                    | Enabler | 1 |
|  | Networks & Linkages                                                                                                                                                                  | Collaboration non-profit or public-private organisations <sup>22 24 26 35 40</sup>                                                                                       | Both    | 5 |
|  |                                                                                                                                                                                      | Not being able to collaborate with other hospitals or clinics and primary care providers <sup>28 32</sup>                                                                | Barrier | 2 |
|  |                                                                                                                                                                                      | Professional organisations in collaboration with national societies can play an important role in catalysing reimbursement and adoption <sup>24</sup>                    | Enabler | 1 |
|  | Media & Change Agents                                                                                                                                                                | Advocates, early adopters and local champions enable implementation of TM <sup>24 35</sup>                                                                               | Enabler | 2 |
|  |                                                                                                                                                                                      | Create (and increase) awareness in the general clinical community of the potential that remote monitoring has <sup>37 40</sup>                                           | Enabler | 2 |
|  |                                                                                                                                                                                      | A standardized initiation video call to inform and instruct each participating centre <sup>37</sup>                                                                      | Enabler | 1 |
|  |                                                                                                                                                                                      | (Lack of) guidelines from health care authorities <sup>21</sup>                                                                                                          | Both    | 1 |
|  |                                                                                                                                                                                      | Device manufacturer that invest in TM <sup>24</sup>                                                                                                                      | Enabler | 1 |
|  |                                                                                                                                                                                      | The dynamics [P] in the COVID-19 pandemic may have impacted the use of TM <sup>37</sup>                                                                                  | Enabler | 1 |
|  |                                                                                                                                                                                      | Consensus on the implementation and research agenda can pave the road to the widespread use of digital health services <sup>38</sup>                                     | Enabler | 1 |
|  |                                                                                                                                                                                      | A national repository could act as the first port of call where policy makers, clinicians and users could access information on remote monitoring projects <sup>40</sup> | Enabler | 1 |
|  |                                                                                                                                                                                      | Information about strategies to educate and empower patients were provided <sup>37</sup>                                                                                 | Enabler | 1 |
|  | Professional societies can review and potentially endorse TM applications that offer valuable decision support and empower the physician's relationship to the patient <sup>24</sup> | Enabler                                                                                                                                                                  | 1       |   |

HCP= Health Care Professional, TM= Telemonitoring

**Appendix 1. Preliminary search**

| Database               | Search syntax                                                                                                                                                                                                                                                                                                                                        | Results                                                                               |
|------------------------|------------------------------------------------------------------------------------------------------------------------------------------------------------------------------------------------------------------------------------------------------------------------------------------------------------------------------------------------------|---------------------------------------------------------------------------------------|
| Pubmed                 | ("Telemedicine"[Mesh] OR telemedicine[tiab] OR mhealth[tiab] OR m-health[tiab] OR ehealth[tiab] OR e-health[tiab]) AND ("Monitoring, Physiologic"[Mesh] OR "Monitoring, Ambulatory"[Mesh] OR telemonitor*[tiab]) AND ("Implementation Science"[Mesh] OR "Health Plan Implementation"[Mesh] AND scale up[tiab] OR implement*[tiab] OR adoption[tiab]) | 723 of which 156 meta-analysis or reviews. None relevant for upscaling telemonitoring |
| JBI Evidence Synthesis | Telemonitoring AND Implementation                                                                                                                                                                                                                                                                                                                    | 14 results, none relevant.                                                            |
| Open Science framework | Telemonitoring OR telemedicine                                                                                                                                                                                                                                                                                                                       | 29 registries, none about upscaling                                                   |
| Prospero database      | (telemonitoring [all fields] OR telemedicine [MeSH]) AND Implementation Science [MeSH] OR Regional Health Planning [MeSH] OR Health Plan Implementation [MeSH] OR Implementation [all fields]                                                                                                                                                        | 102 results, none relevant for upscaling telemonitoring.                              |

## Appendix 2. Search syntax

### Search syntax:

("Telemedicine"[Mesh] OR telemedicine[tiab] OR mhealth[tiab] OR m-health[tiab] OR ehealth[tiab] OR e-health[tiab] OR out-of-office[tiab])

AND

("Monitoring, Physiologic"[Mesh] OR "Monitoring, Ambulatory"[Mesh] OR monitor\*[tiab] OR telemonitor\*[tiab] OR health care[tiab] OR healthcare[tiab])

AND

("Implementation Science"[Mesh] OR "Health Plan Implementation"[Mesh])

AND

scale up[tiab] OR implement\*[tiab] OR adoption[tiab])

AND

("Health Policy"[Mesh] OR "Policy Making"[Mesh] OR "National Health Program "[Mesh] OR policy[tiab] OR survey\*[tiab] OR mapping[tiab])

**Appendix 3**

Framework of dissemination in health services intervention research. From: Mendel et al 2008, *Adm Policy Ment Health* (2008) 35:21–37. The red lined box indicates the focus in this scoping review.

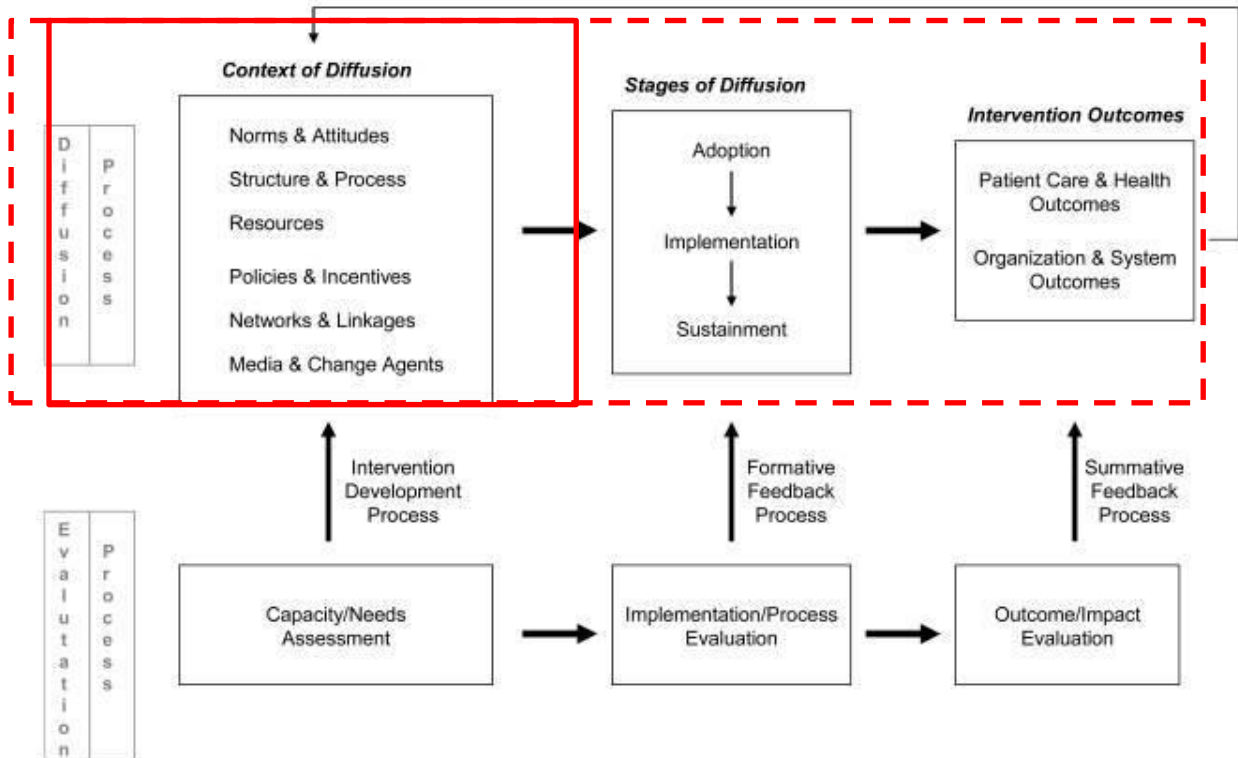

Review only

## Preferred Reporting Items for Systematic reviews and Meta-Analyses extension for Scoping Reviews (PRISMA-ScR) Checklist

| SECTION                                               | ITEM | PRISMA-ScR CHECKLIST ITEM                                                                                                                                                                                                                                                                                  | REPORTED ON PAGE #        |
|-------------------------------------------------------|------|------------------------------------------------------------------------------------------------------------------------------------------------------------------------------------------------------------------------------------------------------------------------------------------------------------|---------------------------|
| <b>TITLE</b>                                          |      |                                                                                                                                                                                                                                                                                                            |                           |
| Title                                                 | 1    | Identify the report as a scoping review.                                                                                                                                                                                                                                                                   | 1                         |
| <b>ABSTRACT</b>                                       |      |                                                                                                                                                                                                                                                                                                            |                           |
| Structured summary                                    | 2    | Provide a structured summary that includes (as applicable): background, objectives, eligibility criteria, sources of evidence, charting methods, results, and conclusions that relate to the review questions and objectives.                                                                              | 2                         |
| <b>INTRODUCTION</b>                                   |      |                                                                                                                                                                                                                                                                                                            |                           |
| Rationale                                             | 3    | Describe the rationale for the review in the context of what is already known. Explain why the review questions/objectives lend themselves to a scoping review approach.                                                                                                                                   | 4                         |
| Objectives                                            | 4    | Provide an explicit statement of the questions and objectives being addressed with reference to their key elements (e.g., population or participants, concepts, and context) or other relevant key elements used to conceptualize the review questions and/or objectives.                                  | 4                         |
| <b>METHODS</b>                                        |      |                                                                                                                                                                                                                                                                                                            |                           |
| Protocol and registration                             | 5    | Indicate whether a review protocol exists; state if and where it can be accessed (e.g., a Web address); and if available, provide registration information, including the registration number.                                                                                                             | 5                         |
| Eligibility criteria                                  | 6    | Specify characteristics of the sources of evidence used as eligibility criteria (e.g., years considered, language, and publication status), and provide a rationale.                                                                                                                                       | 5                         |
| Information sources*                                  | 7    | Describe all information sources in the search (e.g., databases with dates of coverage and contact with authors to identify additional sources), as well as the date the most recent search was executed.                                                                                                  | 5                         |
| Search                                                | 8    | Present the full electronic search strategy for at least 1 database, including any limits used, such that it could be repeated.                                                                                                                                                                            | Appendix 1 and appendix 2 |
| Selection of sources of evidence†                     | 9    | State the process for selecting sources of evidence (i.e., screening and eligibility) included in the scoping review.                                                                                                                                                                                      | 6                         |
| Data charting process‡                                | 10   | Describe the methods of charting data from the included sources of evidence (e.g., calibrated forms or forms that have been tested by the team before their use, and whether data charting was done independently or in duplicate) and any processes for obtaining and confirming data from investigators. | 6                         |
| Data items                                            | 11   | List and define all variables for which data were sought and any assumptions and simplifications made.                                                                                                                                                                                                     | 6                         |
| Critical appraisal of individual sources of evidence§ | 12   | If done, provide a rationale for conducting a critical appraisal of included sources of evidence; describe the methods used and how this information was used in any data synthesis (if appropriate).                                                                                                      | N/A                       |
| Synthesis of results                                  | 13   | Describe the methods of handling and summarizing the data that were charted.                                                                                                                                                                                                                               | 6                         |

| SECTION                                       | ITEM | PRISMA-ScR CHECKLIST ITEM                                                                                                                                                                       | REPORTED ON PAGE #                          |
|-----------------------------------------------|------|-------------------------------------------------------------------------------------------------------------------------------------------------------------------------------------------------|---------------------------------------------|
| <b>RESULTS</b>                                |      |                                                                                                                                                                                                 |                                             |
| Selection of sources of evidence              | 14   | Give numbers of sources of evidence screened, assessed for eligibility, and included in the review, with reasons for exclusions at each stage, ideally using a flow diagram.                    | Page 7, figure 1 and table 1.               |
| Characteristics of sources of evidence        | 15   | For each source of evidence, present characteristics for which data were charted and provide the citations.                                                                                     | Page 7 and table 2                          |
| Critical appraisal within sources of evidence | 16   | If done, present data on critical appraisal of included sources of evidence (see item 12).                                                                                                      | N/A                                         |
| Results of individual sources of evidence     | 17   | For each included source of evidence, present the relevant data that were charted that relate to the review questions and objectives.                                                           | Page 7 and 9, table 2, table 3 and table 4. |
| Synthesis of results                          | 18   | Summarize and/or present the charting results as they relate to the review questions and objectives.                                                                                            | Page 9, 10 and 11                           |
| <b>DISCUSSION</b>                             |      |                                                                                                                                                                                                 |                                             |
| Summary of evidence                           | 19   | Summarize the main results (including an overview of concepts, themes, and types of evidence available), link to the review questions and objectives, and consider the relevance to key groups. | 12, 13                                      |
| Limitations                                   | 20   | Discuss the limitations of the scoping review process.                                                                                                                                          | 14                                          |
| Conclusions                                   | 21   | Provide a general interpretation of the results with respect to the review questions and objectives, as well as potential implications and/or next steps.                                       | 14                                          |
| <b>FUNDING</b>                                |      |                                                                                                                                                                                                 |                                             |
| Funding                                       | 22   | Describe sources of funding for the included sources of evidence, as well as sources of funding for the scoping review. Describe the role of the funders of the scoping review.                 | 15                                          |

JB1 = Joanna Briggs Institute; PRISMA-ScR = Preferred Reporting Items for Systematic reviews and Meta-Analyses extension for Scoping Reviews.

\* Where *sources of evidence* (see second footnote) are compiled from, such as bibliographic databases, social media platforms, and Web sites.

† A more inclusive/heterogeneous term used to account for the different types of evidence or data sources (e.g., quantitative and/or qualitative research, expert opinion, and policy documents) that may be eligible in a scoping review as opposed to only studies. This is not to be confused with *information sources* (see first footnote).

‡ The frameworks by Arksey and O'Malley (6) and Levac and colleagues (7) and the JBI guidance (4, 5) refer to the process of data extraction in a scoping review as data charting.

§ The process of systematically examining research evidence to assess its validity, results, and relevance before using it to inform a decision. This term is used for items 12 and 19 instead of "risk of bias" (which is more applicable to systematic reviews of interventions) to include and acknowledge the various sources of evidence that may be used in a scoping review (e.g., quantitative and/or qualitative research, expert opinion, and policy document).

From: Tricco AC, Lillie E, Zarin W, O'Brien KK, Colquhoun H, Levac D, et al. PRISMA Extension for Scoping Reviews (PRISMA-ScR): Checklist and Explanation. *Ann Intern Med.* 2018;169:467–473. doi: 10.7326/M18-0850.

# BMJ Open

## Enablers and barriers in upscaling telemonitoring across geographic boundaries: a scoping review

|                                 |                                                                                                                                                                                                                                                                                                                                                                                                                                                                                                                                                                                                                                                                                                                                               |
|---------------------------------|-----------------------------------------------------------------------------------------------------------------------------------------------------------------------------------------------------------------------------------------------------------------------------------------------------------------------------------------------------------------------------------------------------------------------------------------------------------------------------------------------------------------------------------------------------------------------------------------------------------------------------------------------------------------------------------------------------------------------------------------------|
| Journal:                        | <i>BMJ Open</i>                                                                                                                                                                                                                                                                                                                                                                                                                                                                                                                                                                                                                                                                                                                               |
| Manuscript ID                   | bmjopen-2021-057494.R2                                                                                                                                                                                                                                                                                                                                                                                                                                                                                                                                                                                                                                                                                                                        |
| Article Type:                   | Original research                                                                                                                                                                                                                                                                                                                                                                                                                                                                                                                                                                                                                                                                                                                             |
| Date Submitted by the Author:   | 24-Mar-2022                                                                                                                                                                                                                                                                                                                                                                                                                                                                                                                                                                                                                                                                                                                                   |
| Complete List of Authors:       | Gijsbers, Harm; Amsterdam UMC Locatie AMC, Department of Surgery, Amsterdam Gastroenterology and Metabolism; Amsterdam UMC Locatie AMC, Department of Rehabilitation<br>Feenstra, Tim M; Amsterdam UMC Locatie AMC, Department of surgery, Amsterdam Gastroenterology and Metabolism<br>Eminovic, Nina; Amsterdam UMC Locatie AMC, Department of Medical Informatics; Dutch Hospital Association<br>van Dam, Debora; University of Amsterdam, Department of surgery<br>Nurmohamed, S. Azam; Amsterdam UMC Locatie AMC, Department of Internal Medicine (Nephrology)<br>van de Belt, Tom; Radboudumc, Health innovations lab<br>Schijven, Marlies; Amsterdam UMC Locatie AMC, Department of Surgery, Amsterdam Gastroenterology and Metabolism |
| <b>Primary Subject Heading</b>: | Health informatics                                                                                                                                                                                                                                                                                                                                                                                                                                                                                                                                                                                                                                                                                                                            |
| Secondary Subject Heading:      | Diagnostics, Health policy                                                                                                                                                                                                                                                                                                                                                                                                                                                                                                                                                                                                                                                                                                                    |
| Keywords:                       | Change management < HEALTH SERVICES ADMINISTRATION & MANAGEMENT, Health informatics < BIOTECHNOLOGY & BIOINFORMATICS, Telemedicine < BIOTECHNOLOGY & BIOINFORMATICS                                                                                                                                                                                                                                                                                                                                                                                                                                                                                                                                                                           |
|                                 |                                                                                                                                                                                                                                                                                                                                                                                                                                                                                                                                                                                                                                                                                                                                               |

SCHOLARONE™  
Manuscripts



I, the Submitting Author has the right to grant and does grant on behalf of all authors of the Work (as defined in the below author licence), an exclusive licence and/or a non-exclusive licence for contributions from authors who are: i) UK Crown employees; ii) where BMJ has agreed a CC-BY licence shall apply, and/or iii) in accordance with the terms applicable for US Federal Government officers or employees acting as part of their official duties; on a worldwide, perpetual, irrevocable, royalty-free basis to BMJ Publishing Group Ltd ("BMJ") its licensees and where the relevant Journal is co-owned by BMJ to the co-owners of the Journal, to publish the Work in this journal and any other BMJ products and to exploit all rights, as set out in our [licence](#).

The Submitting Author accepts and understands that any supply made under these terms is made by BMJ to the Submitting Author unless you are acting as an employee on behalf of your employer or a postgraduate student of an affiliated institution which is paying any applicable article publishing charge ("APC") for Open Access articles. Where the Submitting Author wishes to make the Work available on an Open Access basis (and intends to pay the relevant APC), the terms of reuse of such Open Access shall be governed by a Creative Commons licence – details of these licences and which [Creative Commons](#) licence will apply to this Work are set out in our licence referred to above.

Other than as permitted in any relevant BMJ Author's Self Archiving Policies, I confirm this Work has not been accepted for publication elsewhere, is not being considered for publication elsewhere and does not duplicate material already published. I confirm all authors consent to publication of this Work and authorise the granting of this licence.



## Enablers and barriers in upscaling telemonitoring across geographic boundaries: a scoping review

H.J.H. Gijsbers, T.M. Feenstra, N. Eminovic, D. van Dam, S.A. Nurmohamed, T.H. van de Belt, M.P. Schijven\*

1. H.J.H. Gijsbers, [h.j.gijsbers@amsterdamumc.nl](mailto:h.j.gijsbers@amsterdamumc.nl) Department of Surgery, Amsterdam Gastroenterology and Metabolism, Amsterdam UMC, University of Amsterdam, the Netherlands. Department of Rehabilitation, Amsterdam UMC, University of Amsterdam, the Netherlands.
2. T.M. Feenstra, [tm.feenstra@amsterdamumc.nl](mailto:tm.feenstra@amsterdamumc.nl) Department of surgery, Amsterdam Gastroenterology and Metabolism, Amsterdam UMC, University of Amsterdam, the Netherlands
3. N. Eminovic, [n.eminovic@gmail.com](mailto:n.eminovic@gmail.com), Department of Medical Informatics, Amsterdam UMC, University of Amsterdam, The Netherlands, Currently working at Dutch Hospital Association, Utrecht, the Netherlands.
4. D. van Dam, [d.vandam@amsterdamumc.nl](mailto:d.vandam@amsterdamumc.nl) Department of Surgery, Amsterdam Gastroenterology and Metabolism, Amsterdam UMC, University of Amsterdam, the Netherlands
5. S.A. Nurmohamed, [sa.nurmohamed@amsterdamumc.nl](mailto:sa.nurmohamed@amsterdamumc.nl), Department of Internal Medicine (Nephrology), Amsterdam UMC, the Netherlands
6. T.H. van de Belt, [Tom.vandeBelt@radboudumc.nl](mailto:Tom.vandeBelt@radboudumc.nl), Health Innovation Labs, Radboudumc, the Netherlands.
7. M.P. Schijven, [m.p.schijven@amsterdamumc.nl](mailto:m.p.schijven@amsterdamumc.nl), Department of Surgery, Amsterdam Gastroenterology and Metabolism, Amsterdam UMC, University of Amsterdam, the Netherlands

\*corresponding author Amsterdam UMC, loc. AMC PO box 22660, 1100 DD Amsterdam Zuidoost, the Netherlands

**#title: 12**

**#words abstract: 325**

**#words body: 3520**

**#figures: 2**

**#tables: 5**

**#appendix: 3**

**#words references: 1485**

## Abstract

**Introduction and objective:** Telemonitoring is a method to monitor a person's vital functions via their physiological data at distance, using technology. Whilst pilot studies on the proposed benefits of telemonitoring show promising results, it appears challenging to implement telemonitoring on a larger scale. The aim of this scoping review is to identify the enablers and barriers for upscaling of telemonitoring across different settings and geographical boundaries in healthcare.

**Methods:** PubMed, EMBASE, Cinahl, Web of Science, ProQuest and IEEE databases were searched. Resulting outcomes were assessed by two independent reviewers. Studies were considered eligible if they focused on remote monitoring of patients' vital functions and data was transmitted digitally. Using scoping review methodology, selected studies were systematically assessed on their factors of influence on upscaling of telemonitoring.

**Results:** A total of 2298 titles and abstracts were screened and 19 articles were included for final analysis. This analysis revealed 89 relevant factors of influence: 26 were reported as enabler, 18 were reported as barrier and 45 factors were reported being both. The actual utilisation of telemonitoring varied widely across studies. The most frequently mentioned factors of influence are: resources such as costs or reimbursement, access or interface with electronic medical record and knowledge of frontline staff.

**Conclusion:** Successful upscaling of telemonitoring requires insight into its critical success factors, especially at an overarching national level. To futureproof and facilitate upscaling of telemonitoring it is recommended to use this type of technology in usual care and to find means for reimbursement early on. A wide program on change management, nationally or regionally coordinated, is key. Clear regulatory conditions and professional guidelines may further facilitate widespread adoption and use of telemonitoring. Future research should focus on converting the 'enablers and barriers' as identified by this review into a guideline supporting further nationwide upscaling of telemonitoring.

**Keywords:** telemonitoring, scoping review, upscaling, implementation, remote health monitoring, digital health, technology, e-health

## Article summary – strengths and limitations

- This scoping review uses a transparent methodological approach supported by the application of an established methodological framework.
- Narrowing down the definition of telemonitoring in the search is an important strength of study.
- The use of Mendel’s framework proved to be a good fit for categorizing the scoping review results.
- A second reviewer encoded a purposeful sample of all extracted text components. No significant differences were identified between the first and second reviewer.

For peer review only

## Introduction

Telemonitoring is the collection, transmission, evaluation, and communication of individual health data from a patient to their healthcare provider or extended care team from outside a hospital or clinical office (i.e., the patient's home) using personal health technologies including wireless devices, wearable sensors, implanted health monitors, smartphones, tablets and mobile apps.<sup>1</sup> Pilot studies show that use of telemonitoring supports self-management, for instance by offering direct feedback to the patient.<sup>2</sup> Furthermore, telemonitoring is believed to improve early detection of disease or clinical deterioration and thereby has the potential to reduce hospitalisation and mortality.<sup>2 3 4</sup> In addition, telemonitoring has the potential to monitor patients more frequently or even continuously. As such, use of telemonitoring could improve quality of care, reduce the amount of time a clinician ends up spending to manage patients and increases the frequency of monitoring without increasing workload on healthcare resources.<sup>5-8</sup> Devices with intelligent and reliable computing sensors in wearables, hand-held devices, (smart)phones and implants have become widely available. The World Health Organisation (WHO)<sup>9</sup>, the European Union (EU)<sup>10</sup>, national governments and other governing organisations promote use of such technology if proven to be valid, reliable and sustainable, attempting to facilitate care at a distance.<sup>11</sup> However, positive results from the aforementioned small pilot studies are difficult to replicate when telemonitoring initiatives are to be implemented on a larger scale.<sup>12 13</sup>

In this review, following the WHO definition, 'upscaling' of telemonitoring is defined as 'the expansion and replication of good practice of a telemonitoring project in more than one independent organisation or setting and across geographical boundaries'.<sup>14</sup>

In order to facilitate larger scale implementation of telemonitoring projects using personal health technologies, evidence is needed regarding the barriers and enablers for successful implementation. A preliminary literature search conducted on January 6 2020 in PubMed, JBI Evidence Synthesis, Open Science Framework registries and the PROSPERO database identified that no systematic reviews, meta-analyses, or scoping reviews on scaling up telemonitoring had been performed and that none were underway.(Appendix 1). Indeed, research in the field of telemonitoring is relatively new and lacks high quality and homogeneous studies on the scaling up of telemonitoring. The purpose is to identify factors of influence on scaling up. Therefore it was decided to perform a scoping review.<sup>15</sup> Scoping reviews are a form of knowledge synthesis that incorporate a range of study designs in order to provide a comprehensive summary.<sup>16</sup>

1  
2  
3 The aim of this scoping review is to identify current enablers and barriers for upscaling of  
4 telemonitoring across various healthcare settings in a structured manner.  
5  
6  
7

## 8 **Methods**

9

10 This scoping review was conducted in accordance with the JBI methodology guidance for scoping  
11 reviews, using the Preferred Reporting Items for Systematic Reviews and Meta-Analyses – Scoping  
12 Reviews (PRISMA-ScR) checklist, which is an extension of the PRISMA checklist.<sup>17 18</sup> The scoping  
13 review protocol was registered on March 29<sup>th</sup> 2021, via the Open Science Framework  
14 (<https://osf.io/mpq9g/>)  
15  
16  
17  
18  
19

### 20 **Patient and public involvement**

21 Patients and/or the public were not directly involved in this study.  
22  
23  
24

### 25 **Eligibility criteria**

26 Studies were eligible if they focussed on remote monitoring of patients' vital functions - such as  
27 blood pressure, pulse oximetry, temperature and heart rate - by care practitioners or centres, and  
28 the monitored data was transmitted digitally via (smart)phone, tablet or Internet. Studies had to  
29 describe the implementation or adoption of telemonitoring on a larger scale, for instance in more  
30 than one organisation, or in a larger geographical area (larger regions, provinces or nationwide).  
31 There were no restrictions on publication year and study design and only full-text publications were  
32 included.  
33  
34  
35  
36  
37  
38  
39

40 Studies were restricted to humans, the English language and peer-reviewed publications. Therefore,  
41 ongoing studies, conference abstracts and posters were excluded. Studies reporting self-monitoring  
42 by patients only and studies that solely described the effect of telemonitoring but not the  
43 implementation or adoption were also excluded.  
44  
45  
46  
47  
48

### 49 **Search strategy for Scoping Review**

50 The preliminary search identified appropriate keywords and MeSH-terms. Subsequently, a broad  
51 search strategy for Pubmed was formulated by three reviewers (HG, NE, MS) and a medical librarian,  
52 combining the identified keywords and MeSH-terms related to telemedicine, ehealth,  
53 (tele)monitoring, implementation and upscaling. No filters were applied in the final search strategy.  
54 The complete PubMed search strategy is outlined in Appendix 2 and was adapted for the other  
55 indexed databases. HG performed the literature search of PubMed, EMBASE, Cinahl, Web of Science,  
56  
57  
58  
59  
60

1  
2  
3 ProQuest and IEEE in January 2020 and updated the search on February 1<sup>st</sup> 2022. Included studies  
4 were cross-referenced to identify additional studies.  
5  
6  
7

### 8 **Data Extraction and Analysis**

9  
10 One reviewer (HG) removed duplicates and led the process of study screening and selection. Study  
11 selection was managed using the online reference manager Rayyan.<sup>19</sup> The search results were  
12 reviewed on two sequential levels. In the initial “title and abstract stage”, the article titles and  
13 abstracts were screened according to the inclusion and exclusion criteria independently by two  
14 researchers (HG and TF). The lists of included studies and summaries of the collected data  
15 constructed by the two researchers were compared. Any disagreements were resolved by discussion  
16 and involvement of a third researcher (DvD). In the second “full-text stage”, the remaining articles  
17 were examined to ensure that they met the inclusion criteria.  
18  
19  
20  
21  
22  
23  
24

25 Study characteristics were systematically extracted using a structured data collection form that  
26 included the following parameters: type of telemonitoring, study location, year of publication,  
27 research methods, patient characteristics, and outcome measures of adoption. The charted data was  
28 verified by a second reviewer (TF or DvD).  
29  
30  
31  
32

### 33 **Interpretation and analysis using Mendel’s framework**

34  
35 In addition to the extraction of study characteristics, text components from the included articles,  
36 relevant to the nationwide implementation of telemonitoring, were extracted by one of the  
37 researchers (HG). The extracted text components were uploaded into a qualitative analysis software  
38 program (MAXQDA Analytics Pro, VERBI Software, 2020), and coded to capture all relevant  
39 constructs. A second researcher encoded independently of the first researcher 25% of the articles,  
40 after which they verified their coding. If there were significant differences between the first and  
41 second researcher, the differences were discussed and the procedure repeated.  
42  
43  
44  
45  
46  
47

48 The structure of the analysis was based on Mendel’s framework for Building Evidence on  
49 Dissemination and Implementation in Health Services Research<sup>20</sup> (appendix 3). This framework  
50 supports the understanding and assessing of relevant contextual factors and dynamics affecting the  
51 dissemination, implementation, and sustainability of interventions within communities and  
52 healthcare settings. In this scoping review, the “diffusion process” items of Mendel’s framework  
53 were used to better understand and generalise the relevant contextual factors from different studies  
54 involved with nationwide upscaling of telemonitoring.  
55  
56  
57  
58  
59  
60

## Results

The search yielded 2927 records. After the removal of duplicates, 2298 titles and abstracts were screened for inclusion and exclusion. 2250 studies were excluded after title and abstract screening, leaving 48 articles for full-text screening. All numbers were used to create a flowchart (Figure 1). Additional details for the reasons of exclusion are presented in Table 1. Finally, a total of 19 articles were included for analysis, describing a variety of telemonitoring solutions.<sup>21-38</sup>

### Characteristics of studies

The general characteristics of the included studies are presented in Table 2. Eleven out of 19 articles described a survey<sup>21 22 25 28-30 33 34 36-38</sup>, four described focus group interviews<sup>27 31 35 39</sup>, three articles were narrative reviews<sup>24 26 32</sup>, and one article described the results of a workshop.<sup>40</sup> A total of 89 enabler or barrier factors were mentioned 202 times in 19 studies.

### Scale and utilisation of telemonitoring

The utilisation of telemonitoring was reported in 13 of the 19 studies. Reported utilisation varied widely from “not part of routine care, or not available as standard care” in Austria, Norway, Lithuania, the UK and Sweden, to “90% utilisation of tele-electrocardiography” in Brazil.<sup>21 22 28 33 35</sup>

There was significant heterogeneity of the definition of utilisation, which was reported as: number of patients that used telemonitoring<sup>32 36 37 39</sup>, percentages of actual use<sup>29</sup>, number of clinics that are engaged in telemonitoring<sup>24 36 37</sup>, number of hospitals offering telemonitoring for high-risk pregnancies<sup>38</sup>, number of projects in a country<sup>30</sup> and total recorded measurements.<sup>37</sup>

The percentages of the actual use of telemonitoring in patients with heart failure varied from 3% to 77%.<sup>25 29 37</sup> In Brazil, a telemonitoring system for the monitoring of heart rhythms with an electrocardiogram was implemented in 79 municipalities. This study showed a utilisation ratio higher than 90%.<sup>22</sup> In Denmark, all telemedicine projects are mapped to provide a national contemporary overview of telemedicine initiatives. Utilisation is reported by referring to a website on which 16 active telemonitoring projects are registered within the country at this moment.<sup>30 41</sup> The enablers and barriers for nationwide upscaling of telemonitoring were structured in three domains using Mendel’s framework: context of diffusion, stages of diffusion and intervention outcomes.

### What are the enablers and/or barriers for upscaling of telemonitoring?

Regarding the context of diffusion, the enablers and barriers retrieved were classified into six different categories of contextual factors: being an enabler, a barrier, or both according to Mendel's framework (Figure 2). Table 3 gives an overview of factors and supplementary table 1 describes barriers and/or enablers in more detail.

#### 1. Norms & Attitudes.

Primary physicians needed to adapt their standard procedures in order to make an efficient contribution to care using telemonitoring solutions, for example by using the patients' self-measurements instead of doctor's office in-house measurements.<sup>27</sup> Healthcare professionals or centres that are aware of the benefits have a more positive attitude regarding telemonitoring.<sup>29 31 37</sup> In two studies, healthcare professionals had high expectations of working with telemonitoring, as well as managing caseloads more efficiently.<sup>35 36</sup>

A common perceived barrier for professionals is that telehealth can increase workload and make planning work more difficult when responding to monitoring alerts.<sup>35</sup> Across different studies professionals shared the view that patients may become too dependent on the technology making it a clear barrier for the use of telemonitoring.<sup>27 31</sup> Some studies report scepticism or reservations concerning telemonitoring.<sup>21 31 35</sup>

Another important barrier for the diffusion of telemonitoring is the lack of awareness of the possibilities and opportunities for providing care using remote monitoring among both health care management and clinical staff.<sup>40</sup>

#### 2. Organisational Structure & Process.

Eleven studies reported on organisational items.<sup>21 24-28 32 35-37 40</sup> Adoption of telemonitoring requires an infrastructural investment that will take several years to implement and will involve a complete overhaul of existing practice, clinically, financially, and managerially.<sup>40</sup> An elaborate program of change management is described as an enabler in the upscaling and implementation of telemonitoring.<sup>24 40</sup> Change management is described as continuous evaluation and assessment in the refining of patient selection criteria for remote monitoring, and personalising care pathways.<sup>24</sup> Security and privacy aspects influence implementation.<sup>21 24 28 32 37</sup> Setting up appropriate vendor agreements and protocols is described as an enabler concerning responsibility for incoming data.<sup>21 24 28 35 36 40</sup>

#### 3. Resources.



1  
2  
3 Financial aspects of telemonitoring are described as an important factor in nine studies.<sup>21 24-26 28 35-37 40</sup>  
4 For example, a lack of financial resources is described as among the four most important barriers for  
5 the adoption of eHealth.<sup>25</sup> Six studies described reimbursement as a barrier for implementation of  
6 telemonitoring.<sup>21 24 26 28 33 40</sup> According to these studies a suitable reimbursement solution should be  
7 adopted to incentivise and engage all stakeholders and to drive the intended transformation of  
8 healthcare delivery. Along with the financial aspects, concern rises for the possible inability to access  
9 the telemonitoring system via the electronic medical records.<sup>27 32 35 37 40</sup> Also, a lack of interoperability  
10 generates new tasks to share telehealth data with other clinicians via electronic patient records. This  
11 also causes concerns whether the telehealth data entered in a patient's record are accurate and  
12 relevant. This makes interoperability standards crucial to the success of upscaling remote patient  
13 monitoring programs.<sup>32 40</sup>  
14  
15  
16  
17  
18  
19  
20  
21  
22

#### 23 *4. Policies & Incentives.*

24 Three studies indicate that policies governing telehealth may differ at the state level, which forms a  
25 barrier for implementation on interstate level.<sup>26 35 40</sup> On a national level, professional societies can  
26 issue guidelines to enable telemonitoring.<sup>22 24</sup> European and worldwide policies on innovation  
27 friendly, legal and regulatory frameworks may enable upscaling of telemonitoring.<sup>24 26 40</sup>  
28  
29  
30  
31  
32

#### 33 *5. Networks & Linkages.*

34 Four studies described non-profit or public-private collaborations as enablers for implementation of  
35 telemonitoring.<sup>24 26 28 32</sup>. For example, a role for professional organisations like the European Society  
36 of Cardiology (ESC) in collaboration with national societies is described in catalysing reimbursement  
37 and adoption of telemonitoring in cardiac diseases.<sup>24</sup> A national repository could act as the first port  
38 of call where policy makers, clinicians, and users could access information of remote monitoring  
39 projects.<sup>40</sup> Another approach could be an extended partnership between device companies and  
40 health care systems involving telemonitoring services.<sup>26</sup>  
41  
42  
43  
44  
45  
46

47 At a regional level, collaborative efforts may connect hospital and regional health executives to  
48 network leaders, focusing on adoption, scale, and spread of network monitoring solutions.

49 Collaboration between hospitals and primary care providers, within the Ontario Telemedicine  
50 Network, proved to be an important factor for the sustainability of a tele homecare program in  
51 Canada.<sup>28 32</sup>  
52  
53  
54

#### 55 *6. Media & Change Agents.*

56  
57  
58  
59  
60

1  
2  
3 Two studies described media and change agents as enablers for the implementation of  
4 telemonitoring. Advocates, early adopters and local champions are described as an important source  
5 of information and advice for the introduction of telemonitoring.<sup>24 35 37</sup>  
6  
7  
8  
9

### 10 **Stages of diffusion**

11 Enablers and barriers were reported not to be linked to an implementation stage nor to a specific  
12 stage of diffusion. However, based on the reported utilisation and phase of upscaling, it is possible to  
13 analyse what stage of diffusion a telemonitoring project is most likely to be in. Eight studies  
14 described telemonitoring in the stage of pre adoption.<sup>21 25-28 33 35 36</sup> Six studies described  
15 telemonitoring in the implementation stage.<sup>24 31 32 37 39</sup> Only two studies described telemonitoring  
16 projects in the phase of sustainment.<sup>22 32</sup> In three studies it was not possible to analyse the stage of  
17 diffusion.  
18  
19  
20  
21  
22  
23  
24

### 25 **Intervention outcomes**

26 Enablers and barriers for implementation may affect outcomes for individuals in the community, as  
27 well as local organisations and systems of care. All the expected outcomes for implementation of  
28 telemonitoring are described in table 4.  
29  
30  
31  
32

33 *Patient Care & Health Outcomes.* Six studies reported outcomes on an individual level and in what  
34 way they were expected to be affected by telemonitoring. For example, implementation of  
35 telemonitoring was expected to improve self-care or patient empowerment.<sup>21 24 27 28 36 40</sup>  
36  
37  
38  
39

40 *Organisation & System Outcomes.*

41 Five studies reported on the expected outcomes on an organisational and system level. For example,  
42 when telemonitoring was implemented, it was expected that more patients could be treated, which  
43 would reduce admission and visits<sup>21 24 28 33 40</sup>, workload would be reduced<sup>21 28 33</sup> and costs would be  
44 reduced.<sup>21 24 28</sup>  
45  
46  
47  
48  
49

### 50 **Discussion**

51 This scoping review provides insight into the enablers and/or barriers that affect upscaling of  
52 telemonitoring in healthcare across different settings. All included studies examined large scale  
53 adoption or implementation of telemonitoring. One study described an International and European  
54 scale up.<sup>37</sup> This review retrieves and identifies important overarching factors, relevant for nationwide  
55 upscaling.  
56  
57  
58  
59  
60

1  
2  
3  
4  
5 One of the most frequently mentioned factors of influence is “costs” or “reimbursement”. For  
6 example; providing an eHealth infrastructure for free throughout the project duration is a great  
7 enabler.<sup>37</sup> Reimbursement is mentioned as a solution - “a suitable reimbursement solution should be  
8 adopted”<sup>24</sup> – or as a barrier: “there is no financial backing to adopt new systems such as remote  
9 monitoring”.<sup>40</sup> Economic evaluations of eHealth applications are gaining momentum, and studies  
10 have shown considerable variation regarding the costs and benefits that they include.<sup>42</sup> Economic  
11 studies on telemonitoring in heart failure and women at risk of preeclampsia describe this duality.  
12 The initial cost of the telemonitoring equipment may be an obstacle to widespread use of  
13 telemonitoring. Although telemonitoring will require an initial financial investment, economic studies  
14 show substantially reduction of costs in the long term.<sup>43 44</sup> Costs, as a factor of influence, exist in  
15 coherence of “a lack of evidence”. In the absence of solid empirical evidence, key decision makers  
16 may doubt the effectiveness of eHealth, which, in turn, limits investment and its long-term  
17 integration into the mainstream health care system.<sup>45</sup> Exploring alternative payment models, for  
18 example “temporary” funding of telemonitoring by health insurers, could bridge that gap so that the  
19 necessary evidence can be collected.  
20  
21  
22  
23  
24  
25  
26  
27  
28  
29  
30

31 Over half of the factors identified are stated both as an enabler and a barrier. Therefore, factors of  
32 influence found in this scoping review can be used pragmatically; e.g. as a directive to check whether  
33 the factor is a barrier or an enabler in projects where upscaling is required. A relatively large number  
34 of factors are related to the “norms & attitudes” of users. Although this is an important factor for  
35 local implementation, one would expect that proportionately more context-related factors for  
36 nationwide scaling up would be found. Resources, attitudes, intrinsic motivation and behaviour of  
37 end-users, costs and technical knowledge of health care providers are all important factors of  
38 influence. These findings are consistent with reviews on implementation of other types of eHealth or  
39 telemedicine.<sup>13 46-49</sup>  
40  
41  
42  
43  
44  
45  
46  
47

48 The utilisation and upscaling of telemonitoring varied widely across settings and was not reported in  
49 30% of the included studies. Because adoption is not clearly defined in the studies it is not possible to  
50 interpret the enablers and barriers for each phase of adoption. In future studies, it is recommended  
51 to give a clear definition of adoption and to report utilisation. Only then is it possible to learn more  
52 about barriers and facilitators in various stages of implementation to scale up.  
53  
54  
55  
56  
57

58 Studies in this scoping review reported expected “patient care & health outcomes”. Outcomes were  
59 not correlated to certain enablers or barriers. Based on this scoping review it is not possible to draw  
60

1  
2  
3 conclusions regarding factors of upscaling influence the outcomes of care, nor which outcomes of  
4 care influence the upscaling. Although it would be useful to know more about upscaling of  
5 telemonitoring in relation to specific patients conditions, this study focused on the possible  
6 facilitators and barriers for (nation)wide upscaling regardless of patient conditions.  
7  
8  
9

10  
11 An untouched topic in this scoping review is the potential change in health (in)equity created or  
12 perpetuated by the scale-up of telemonitoring projects. After all, those without access to the  
13 technology and/or infrastructure necessary for successful telehealth may be left out of any scale-up  
14 efforts. A retrospective cohort during the Covid-19 pandemic shows that inequities in telehealth  
15 utilization persist and require ongoing monitoring.<sup>50</sup> In this review, lack of resources and  
16 infrastructure are key factors that not only impede scale-up, but can also cause health inequities.  
17 Information and education strategies appear to be important enablers for scale-up, but they are also  
18 successful strategies for reducing health inequities.  
19  
20  
21  
22  
23  
24  
25

### 26 *Practical implications*

27  
28 Based on the findings in this study, a coordinated and structured collaborative approach enables the  
29 upscaling of telemonitoring, embodying:

30  
31 A wide program on change management, including policies and protocols on adaption of healthcare  
32 processes; Implementation coordinators, who set up requirement specifications with particular  
33 attention to interoperability standards, telemonitoring access to electronic medical records, security  
34 and privacy aspects, and appropriate vendor agreements; Widespread marketing and recruitment  
35 initiatives, for example social media channels that enable the recruitment of participating centres;  
36 Collaboration among different hospitals and between primary care and hospitals, as a way to  
37 overcome organisational and regional differences and to create an economy of scale, and;  
38  
39  
40  
41  
42  
43  
44  
45  
46  
47  
48  
49  
50  
51  
52  
53  
54  
55  
56  
57  
58  
59  
60  
New and innovative ways for reimbursement.

There was disagreement during the selection of studies that required discussion with a third  
reviewer. There are studies in which blood pressure is measured automatically at home. However,  
the data of these measurements were not exchanged electronically with the hospital in these  
studies. Studies investigating this form of home measurement have not been included in this scoping  
review. Narrowing down the definition of telemonitoring in the search is an important strength of  
study. A range of terms like “remote monitoring”, “teleconsultation”, “telehealth” or “telecare” is  
used interchangeably in the definition of telemonitoring. There are 23 different exclusion reasons for  
2015 exclusions due to the terminology of telemonitoring. (Table 1). For example; teleconsultation,  
video-consultation and remote monitoring by telephone calls are all described as telemonitoring and

1  
2  
3 355 studies used “telemonitoring” as a keyword for a mobile health application without  
4 telemonitoring functionality. Using this precise definition of telemonitoring makes it possible to  
5 compare the results of this study with future studies on upscaling telemonitoring. Another strength  
6 of this study is the use of Mendel’s framework, which provided to be fit for categorizing the scoping  
7 review results on upscaling of telemonitoring across the included studies.  
8  
9  
10

11  
12  
13 This review analysed search results from four well-known research databases. It uses key terms  
14 registered with MeSH, and multiple reviewers determined the inclusion and exclusion criteria. A  
15 limitation to this study could be the coding of extracted text components by the second reviewer,  
16 who coded only a purposeful sample of all studies. However, no significant differences were  
17 identified between the first and second reviewer, therefore it is unlikely that this resulted in bias.  
18  
19  
20  
21  
22

23 Due to the large amount of heterogeneity in the included studies with regard to study design, types  
24 of telemonitoring, and measurement of adoption or utilisation, advice on how to scale up a  
25 telemonitoring project within countries has to be made carefully. For future research it is desirable to  
26 use a clear and narrow definition of telemonitoring, utilisation and outcome measures.  
27  
28  
29  
30  
31

### 32 **Conclusion and recommendations**

33 We live in a world where telemonitoring rapidly integrates into preventive and clinical care and well-  
34 being. Successful upscaling of telemonitoring requires insight into the factors of influence in  
35 adoption, especially at an overarching national level. To futureproof and facilitate upscaling of  
36 telemonitoring it is recommended to find means for reimbursement to use this type of technology in  
37 usual care and to explore alternative payment models early on. A wide program on change  
38 management, national or regional coordinated, is key. Clear regulatory conditions and professional  
39 guidelines may further facilitate widespread adoption and use of telemonitoring. The results of this  
40 study can be used to help develop a guideline for upscaling.  
41  
42  
43  
44  
45  
46  
47  
48

49 **Acknowledgements** The authors wish to thank Ms. F.S. van Etten-Jamaludin, clinical librarian at the  
50 research support department of Amsterdam UMC, for her support searching the databases and Mrs  
51 Valerie Young, GradDipPhys, MSc, for her critical review on grammatical errors.  
52  
53  
54

55 **Contributorship statement** HG, NE, DvD and MS were involved with the design of the work. HG and  
56 TF did the screening of titles and abstracts to include studies. HG, TF and DvD extracted study  
57 characteristics. HG and DvD encode extracted text components. HG, TF, NE, DvD and MS prepared  
58 the original draft of the paper. SN, TvdB and MS contributed to the refinement of the paper. All  
59  
60

1  
2  
3 authors have read and approved the final paper and agree to be accountable for all aspects of the  
4 work.  
5

6  
7  
8 **Competing interests** None declared.  
9

10  
11 **Funding** The authors have not declared a specific grant for this research from any funding agency in  
12 the public, commercial or not-for-profit sectors.  
13  
14

15  
16  
17  
18 **Data sharing statement** No additional data available  
19

20  
21 **Patient consent for publication** Not required.  
22

23 **Ethics approval** This study does not involve human participants.  
24

25 **Provenance and peer review** Not commissioned; externally peer reviewed.  
26  
27

## 28 **Figure legends**

29  
30 **Figure 1.** PRISMA flowchart showing the process of including and excluding studies.  
31

32  
33 **Figure 2.** The number of enablers, barriers, or both regarding the context of diffusion according to  
34 Mendel's framework.  
35  
36  
37  
38  
39  
40  
41  
42  
43  
44  
45  
46  
47  
48  
49  
50  
51  
52  
53  
54  
55  
56  
57  
58  
59  
60

## References

1. ATA. ATA Telehealth: Defining 21st Century Care: American Telemedicine Association, 2020.
2. Farias FAC, Dagostini CM, Bicca YA, et al. Remote Patient Monitoring: A Systematic Review. *Telemed J E Health* 2019 doi: 10.1089/tmj.2019.0066 [published Online First: 2019/07/18]
3. Bashi N, Karunanithi M, Fatehi F, et al. Remote Monitoring of Patients With Heart Failure: An Overview of Systematic Reviews. *J Med Internet Res* 2017;19(1):e18. doi: 10.2196/jmir.6571 [published Online First: 2017/01/22]
4. Kitsiou S, Pare G, Jaana M. Effects of home telemonitoring interventions on patients with chronic heart failure: an overview of systematic reviews. *J Med Internet Res* 2015;17(3):e63. doi: 10.2196/jmir.4174 [published Online First: 2015/03/15]
5. Fazal N, Webb A, Bangoura J, et al. Telehealth: improving maternity services by modern technology. *BMJ Open Qual* 2020;9(4) doi: 10.1136/bmjopen-2019-000895 [published Online First: 2020/11/06]
6. Shah SS, Gvozdanovic A, Knight M, et al. Mobile App-Based Remote Patient Monitoring in Acute Medical Conditions: Prospective Feasibility Study Exploring Digital Health Solutions on Clinical Workload During the COVID Crisis. *JMIR Form Res* 2021;5(1):e23190. doi: 10.2196/23190 [published Online First: 2021/01/06]
7. Ong MK, Romano PS, Edgington S, et al. Effectiveness of Remote Patient Monitoring After Discharge of Hospitalized Patients With Heart Failure: The Better Effectiveness After Transition -- Heart Failure (BEAT-HF) Randomized Clinical Trial. *JAMA Intern Med* 2016;176(3):310-8. doi: 10.1001/jamainternmed.2015.7712 [published Online First: 2016/02/10]
8. Bodenheimer T, Sinsky C. From triple to quadruple aim: care of the patient requires care of the provider. *Annals of family medicine* 2014;12(6):573-6. doi: 10.1370/afm.1713 [published Online First: 2014/11/12]
9. Global diffusion of eHealth: making universal health coverage achievable. Report of the third global survey on eHealth Geneva: World Health Organization; 2016 [Available from: <https://www.who.int/publications/i/item/9789241511780>.
10. Communication from the commission to the European Parliament, the council, the European Economic and Social Committee and the Committee of the Regions on enabling the digital transformation of health and care in the Digital Single Market; empowering citizens and building a healthier society Brussels: European Commission; 2018 [cited European Commission. Available from: <https://ec.europa.eu/digital-single-market/en/news/communication-enabling-digital-transformation-health-and-care-digital-single-market-empowering> accessed 01-03 2021.
11. De juiste zorg op de juiste plek: Taskforce zorg op de juiste plek; 2018 [Available from: <https://www.rijksoverheid.nl/documenten/rapporten/2018/04/06/rapport-de-juiste-zorg-op-de-juiste-plek> accessed 01-03 2021.
12. Henderson C, Knapp M, Fernandez JL, et al. Cost effectiveness of telehealth for patients with long term conditions (Whole Systems Demonstrator telehealth questionnaire study): nested economic evaluation in a pragmatic, cluster randomised controlled trial. *Bmj* 2013;346(mar20 4):f1035-f35. doi: 10.1136/bmj.f1035
13. Ross J, Stevenson F, Lau R, et al. Factors that influence the implementation of e-health: a systematic review of systematic reviews (an update). *Implement Sci* 2016;11(1):146. doi: 10.1186/s13012-016-0510-7 [published Online First: 2016/10/27]
14. Scaling up projects and initiatives for better health: from concepts to practice WHO regional office for Europe 2016 [Available from: <https://www.euro.who.int/en/publications/abstracts/scaling-up-projects-and-initiatives-for-better-health-from-concepts-to-practice-2016#:~:text=Contact%20us,Scaling%20up%20projects%20and%20initiatives%20for%20better,from%20concepts%20to%20>

- 1  
2  
3 [20practice%20\(2016\)&text=Scaling%20up%20means%20expanding%20or,the%20effectiveness%20of%20an%20intervention](#). accessed 01-03 2021.
- 4  
5  
6 15. Munn Z, Peters MDJ, Stern C, et al. Systematic review or scoping review? Guidance for authors  
7 when choosing between a systematic or scoping review approach. *BMC medical research*  
8 *methodology* 2018;18(1):143. doi: 10.1186/s12874-018-0611-x [published Online First:  
9 2018/11/21]
- 10 16. Arksey H, O'Malley L. Scoping studies: towards a methodological framework. *International*  
11 *Journal of Social Research Methodology* 2005;8(1):19-32. doi:  
12 10.1080/1364557032000119616
- 13 17. Moher D, Liberati A, Tetzlaff J, et al. Preferred reporting items for systematic reviews and meta-  
14 analyses: the PRISMA statement. *PLoS medicine* 2009;6(7):e1000097. doi:  
15 10.1371/journal.pmed.1000097 [published Online First: 2009/07/22]
- 16 18. Peters MDJ, Marnie C, Tricco AC, et al. Updated methodological guidance for the conduct of  
17 scoping reviews. *JBI Evid Implement* 2021;19(1):3-10. doi: 10.1097/XEB.0000000000000277  
18 [published Online First: 2021/02/12]
- 19 19. Ouzzani M, Hammady H, Fedorowicz Z, et al. Rayyan-a web and mobile app for systematic  
20 reviews. *Systematic reviews* 2016;5(1):210. doi: 10.1186/s13643-016-0384-4 [published  
21 Online First: 2016/12/07]
- 22 20. Mendel P, Meredith LS, Schoenbaum M, et al. Interventions in organizational and community  
23 context: a framework for building evidence on dissemination and implementation in health  
24 services research. *Adm Policy Ment Health* 2008;35(1-2):21-37. doi: 10.1007/s10488-007-  
25 0144-9 [published Online First: 2007/11/09]
- 26 21. Aamodt IT, Lycholip E, Celutkiene J, et al. Health Care Professionals' Perceptions of Home  
27 Telemonitoring in Heart Failure Care: Cross-Sectional Survey. *J Med Internet Res*  
28 2019;21(2):e10362. doi: 10.2196/10362 [published Online First: 2019/02/07]
- 29 22. Alkmim MB, Silva CBG, Figueira RM, et al. Brazilian National Service of Telediagnosis in  
30 Electrocardiography. *Stud Health Technol Inform*;264:1635-36.
- 31 23. Cook DJ, Doolittle GC, Ferguson D, et al. Explaining the adoption of telemedicine services: an  
32 analysis of a paediatric telemedicine service. *J Telemed Telecare* 2002;8:106-7.
- 33 24. Chronaki CE, Vardas P. Remote monitoring costs, benefits, and reimbursement: a European  
34 perspective. *Europace*;15:i59-i64.
- 35 25. Faber S, van Geenhuizen M, de Reuver M. eHealth adoption factors in medical hospitals: A focus  
36 on the Netherlands. *Int J Med Inform* 2017;100:77-89. doi: 10.1016/j.ijmedinf.2017.01.009  
37 [published Online First: 2017/03/01]
- 38 26. Fraiche AM, Eapen ZJ, McClellan MB. Moving Beyond the Walls of the Clinic: Opportunities and  
39 Challenges to the Future of Telehealth in Heart Failure. *JACC Heart Fail*;5(4):297-304.
- 40 27. Hanley J, Pinnock H, Paterson M, et al. Implementing telemonitoring in primary care: learning  
41 from a large qualitative dataset gathered during a series of studies. *BMC Fam*  
42 *Pract*;19(1):118.
- 43 28. Kato NP, Johansson P, Okada I, et al. Heart Failure Telemonitoring in Japan and Sweden: A Cross-  
44 Sectional Survey. *J Med Internet Res* 2015;17(11):e258. doi: 10.2196/jmir.4825 [published  
45 Online First: 2015/11/15]
- 46 29. Klack L, Ziefle M, Wilkowska W, et al. Telemedical versus conventional heart patient monitoring: a  
47 survey study with German physicians. *Int J Technol Assess Health Care*;29(4):378-83.
- 48 30. Kristensen MBD, Hoiberg L, Nohr C. Updated Mapping of Telemedicine Projects in Denmark. *Stud*  
49 *Health Technol Inform* 2019;257:223-28.
- 50 31. MacNeill V, ers C, Fitzpatrick R, et al. Experiences of front-line health professionals in the delivery  
51 of telehealth: a qualitative study. *Br J Gen Pract*;64(624):e401-7.
- 52 32. McGillion MH, Duceppe E, Allan K, et al. Postoperative Remote Automated Monitoring: Need for  
53 and State of the Science. *Canadian Journal of Cardiology*;34(7):850-62.
- 54  
55  
56  
57  
58  
59  
60



- 1  
2  
3 33. Muigg D, Kastner P, Duftschmid G, et al. Readiness to use telemonitoring in diabetes care: a  
4 cross-sectional study among Austrian practitioners. *BMC Med Inform Decis Mak*  
5 2019;19(1):26. doi: 10.1186/s12911-019-0746-7 [published Online First: 2019/01/31]  
6  
7 34. Okazaki S, Castaneda JA, Sanz S. Clinicians' assessment of mobile monitoring: a comparative study  
8 in Japan and Spain. *Med 2 0*;2(2):e11.  
9  
10 35. Taylor J, Coates E, Brewster L, et al. Examining the use of telehealth in community nursing:  
11 identifying the factors affecting frontline staff acceptance and telehealth adoption. *J Adv*  
12 *Nurs*;71(2):326-37.  
13  
14 36. de Vries AE, van der Wal MH, Nieuwenhuis MM, et al. Health professionals' expectations versus  
15 experiences of internet-based telemonitoring: survey among heart failure clinics. *J Med*  
16 *Internet Res*;15(1):e4.  
17  
18 37. Gawalko M, Duncker D, Manninger M, et al. The European TeleCheck-AF project on remote app-  
19 based management of atrial fibrillation during the COVID-19 pandemic: centre and patient  
20 experiences. *Europace* 2021 doi: 10.1093/europace/euab050 [published Online First:  
21 2021/04/07]  
22  
23 38. van den Heuvel JFM, Ayubi S, Franx A, et al. Home-Based Monitoring and Telemonitoring of  
24 Complicated Pregnancies: Nationwide Cross-Sectional Survey of Current Practice in the  
25 Netherlands. *JMIR Mhealth Uhealth* 2020;8(10):e18966. doi: 10.2196/18966 [published  
26 Online First: 2020/10/29]  
27  
28 39. Cook EJ, hawa G, Sharp C, et al. Exploring the factors that influence the decision to adopt and  
29 engage with an integrated assistive telehealth and telecare service in Cambridgeshire, UK: a  
30 nested qualitative study of patient 'users' and 'non-users'. *BMC Health Serv Res*;16:137.  
31  
32 40. Diaz-Skeete Y, Giggins OM, McQuaid D, et al. Enablers and obstacles to implementing remote  
33 monitoring technology in cardiac care: A report from an interactive workshop. *Health*  
34 *informatics journal* 2019:1460458219892175. doi:  
35 <http://dx.doi.org/10.1177/1460458219892175>  
36  
37 41. MedCom. The Telemedicine Map [cited 2020 june 3rd]. Available from: [https://telemedicinsk-](https://telemedicinsk-landkort.dk)  
38 [landkort.dk](https://telemedicinsk-landkort.dk)  
39  
40 42. Sulz S, van Elten HJ, Askari M, et al. eHealth Applications to Support Independent Living of Older  
41 Persons: Scoping Review of Costs and Benefits Identified in Economic Evaluations. *J Med*  
42 *Internet Res* 2021;23(3):e24363. doi: 10.2196/24363 [published Online First: 2021/03/10]  
43  
44 43. van den Heuvel JFM, van Lieshout C, Franx A, et al. SAFE@HOME: Cost analysis of a new care  
45 pathway including a digital health platform for women at increased risk of preeclampsia.  
46 *Pregnancy Hypertens* 2021;24:118-23. doi: 10.1016/j.pregphy.2021.03.004 [published Online  
47 First: 2021/04/05]  
48  
49 44. Seto E. Cost comparison between telemonitoring and usual care of heart failure: a systematic  
50 review. *Telemed J E Health* 2008;14(7):679-86. doi: 10.1089/tmj.2007.0114 [published Online  
51 First: 2008/09/27]  
52  
53 45. Miller EA. Solving the disjuncture between research and practice: telehealth trends in the 21st  
54 century. *Health Policy* 2007;82(2):133-41. doi: 10.1016/j.healthpol.2006.09.011 [published  
55 Online First: 2006/10/19]  
56  
57 46. Simblett S, Greer B, Matcham F, et al. Barriers to and Facilitators of Engagement With Remote  
58 Measurement Technology for Managing Health: Systematic Review and Content Analysis of  
59 Findings. *J Med Internet Res* 2018;20(7):e10480. doi: 10.2196/10480 [published Online First:  
60 2018/07/14]  
61  
62 47. Varsi C, Solberg Nes L, Kristjansdottir OB, et al. Implementation Strategies to Enhance the  
63 Implementation of eHealth Programs for Patients With Chronic Illnesses: Realist Systematic  
64 Review. *J Med Internet Res* 2019;21(9):e14255. doi: 10.2196/14255 [published Online First:  
65 2019/10/02]  
66  
67 48. Ahmed B, Dannhauser T, Philip N. A systematic review of reviews to identify key research  
68 opportunities within the field of eHealth implementation. *J Telemed Telecare*  
69 2019;25(5):276-85. doi: 10.1177/1357633X18768601 [published Online First: 2018/04/29]

- 1  
2  
3 49. Scott Kruse C, Karem P, Shifflett K, et al. Evaluating barriers to adopting telemedicine worldwide:  
4 A systematic review. *J Telemed Telecare* 2018;24(1):4-12. doi: 10.1177/13576333X16674087  
5 [published Online First: 2018/01/13]  
6  
7 50. Jaffe DH, Lee L, Huynh S, et al. Health Inequalities in the Use of Telehealth in the United States in  
8 the Lens of COVID-19. *Popul Health Manag* 2020;23(5):368-77. doi: 10.1089/pop.2020.0186  
9 [published Online First: 2020/08/21]  
10  
11  
12  
13  
14  
15  
16  
17  
18  
19  
20  
21  
22  
23  
24  
25  
26  
27  
28  
29  
30  
31  
32  
33  
34  
35  
36  
37  
38  
39  
40  
41  
42  
43  
44  
45  
46  
47  
48  
49  
50  
51  
52  
53  
54  
55  
56  
57  
58  
59  
60

For peer review only

**Table 1 Reasons for exclusion.**

| # excluded |      | Reasons                                                                                                                                                                                                                                                                                                                                                                                                                                                                                                                                                                                                                                                                                                                                                                                                |
|------------|------|--------------------------------------------------------------------------------------------------------------------------------------------------------------------------------------------------------------------------------------------------------------------------------------------------------------------------------------------------------------------------------------------------------------------------------------------------------------------------------------------------------------------------------------------------------------------------------------------------------------------------------------------------------------------------------------------------------------------------------------------------------------------------------------------------------|
| 2279       | 2015 | Not describing telemonitoring as defined in the inclusion criteria; but described<br>569 teleconsultation<br>355 mHealth applications (without telemonitoring functionality)<br>251 health informatics topic in general<br>126 implementation of an EHR<br>105 e-mental health<br>61 lifestyle promotion<br>44 internet based therapy<br>23 tele-dermatology<br>22 tele-rehabilitation<br>19 e-prescription<br>18 addiction related<br>15 related to systems and technology<br>12 tele-ICU<br>12 smart home (care)<br>10 teledentistry<br>9 AI related<br>9 tele-ophtalmology<br>5 e-registries<br>5 teleradiology<br>5 blockchain<br>3 background articles<br>2 teleaudiology, 2 internet of things, 2 robotics, 1 RFID, 1 AR/VR<br>325 excluded for not describing telemonitoring with other reasons |
|            | 146  | articles described a telemonitoring or eHealth project, without describing implementation or adoption.                                                                                                                                                                                                                                                                                                                                                                                                                                                                                                                                                                                                                                                                                                 |
|            | 57   | Articles described telemonitoring implementation, but not in more than one independent organisation or setting and across geographical boundaries.                                                                                                                                                                                                                                                                                                                                                                                                                                                                                                                                                                                                                                                     |
|            | 26   | study protocol                                                                                                                                                                                                                                                                                                                                                                                                                                                                                                                                                                                                                                                                                                                                                                                         |
|            | 24   | opinion papers or interviews                                                                                                                                                                                                                                                                                                                                                                                                                                                                                                                                                                                                                                                                                                                                                                           |
|            | 15   | non-English                                                                                                                                                                                                                                                                                                                                                                                                                                                                                                                                                                                                                                                                                                                                                                                            |

EHR = Electronic Health Record, mHealth = mobile Health, RFID = Radio-frequency identification, tele-ICU = tele intensive care unit, AI = artificial intelligence, AR/VR = augmented reality / virtual reality.

**Table 2 Study characteristics**

| #  | Study and year                | Country              | Design                                 | Condition                                                          | Type of telemonitoring                                         | Analysis                                                | Outcome measures for adoption                                             |
|----|-------------------------------|----------------------|----------------------------------------|--------------------------------------------------------------------|----------------------------------------------------------------|---------------------------------------------------------|---------------------------------------------------------------------------|
| 1  | Aamodt 2019 <sup>21</sup>     | Norway and Lithuania | Cross-sectional survey                 | Heart failure care                                                 | Body weight, blood pressure, heart rate, dyspnea               | Summative content analysis                              | Reported as not part of routine care / standard care                      |
| 2  | Alkmim 2019 <sup>22</sup>     | Brazil               | Survey                                 | Cardiology                                                         | Tele-ECG                                                       | Descriptive statistics                                  | Utilisation >3dys per week                                                |
| 3  | Chronaki 2013 <sup>24</sup>   | Europe               | Narrative review                       | Diverse                                                            | Tele-ECG                                                       | N.a.                                                    | Health care costs + number of clinics engaging in TM                      |
| 4  | Cook 2016 <sup>39</sup>       | UK                   | Qualitative semi-structured interviews | COPD                                                               | Telehealth: Pulse oximetry, temperature, pulse, blood pressure | Framework method                                        | N.a.                                                                      |
| 5  | Diaz-Skeete <sup>40</sup>     | Republic of Ireland  | Workshop report                        | Cardiac care                                                       | n.a.                                                           | n.a.                                                    | n.a.                                                                      |
| 6  | Faber, 2017 <sup>25</sup>     | Netherlands          | Survey                                 | Heart failure + diabetes                                           | N.a.                                                           | Structured equation modelling approach                  | Extent of adoption in percentages                                         |
| 7  | Fraiche 2017 <sup>26</sup>    | US                   | Narrative review                       | Heart failure                                                      | Blood pressure, weight, ECG                                    | N.a.                                                    | N.a.                                                                      |
| 8  | Hanley 2018 <sup>27</sup>     | Scotland             | Qualitative interview + focus groups   | COPD, hypertension, BP after stroke, COPD, heart failure, diabetes | SpO2, BP, blood glucose,                                       | Interpretive description approach and thematic analysis | N.a.                                                                      |
| 9  | Kato 2015 <sup>28</sup>       | Japan and Sweden     | Cross-sectional survey                 | Heart failure                                                      | Monitoring physical condition and noticing a decline           | Descriptive analysis and content analysis methodology   | 4 domains<br>Reported as not part of routine care                         |
| 10 | Klack, 2013 <sup>29</sup>     | Germany              | Survey                                 | Heart patient                                                      | weight, temperature, blood pressure, coagulation               | Descriptive statistics                                  | Physician and engineers perspectives<br>Extent of adoption in percentages |
| 11 | Kristensen 2019 <sup>30</sup> | Denmark              | Email survey                           | Chronic heart failure, atrial                                      | Blood pressure, heart rhythm,                                  | Number of initiatives in                                | Number of projects                                                        |

|    |                                   |                 |                                        |                                                                                           |                                                                 |                              |                                                             |
|----|-----------------------------------|-----------------|----------------------------------------|-------------------------------------------------------------------------------------------|-----------------------------------------------------------------|------------------------------|-------------------------------------------------------------|
|    |                                   |                 |                                        | fibrillation, COPD, ADHD, Pregnant with complications, hypertension, patients with an ICD | body weight, heart rate, blood glucose,                         | interactive map online       | registered.                                                 |
| 12 | MacNeill, 2014 <sup>31</sup>      | UK              | Semi structured qualitative interviews | Chronic heart disease, COPD and diabetes                                                  | Blood pressure, weight, oxygen, blood glucose                   | Modified grounded theory     |                                                             |
| 13 | McGillion 2018 <sup>32</sup>      | Canada          | Narrative review                       | Surgical population                                                                       | Respiratory rate, blood pressure, heart rate, SpO2, temperature | N.a.                         | N.a.                                                        |
| 14 | Muigg, 2019 <sup>33</sup>         | Austria         | Cross-sectional survey                 | Diabetes                                                                                  | Blood pressure and blood glucose                                | Qualitative content analysis | Reported as not part of routine care                        |
| 15 | Okazaki, 2013 <sup>34</sup>       | Japan and Spain | Survey                                 | Not specified                                                                             | Not specified                                                   | Causal modeling              | n.a.                                                        |
| 16 | Taylor, 2014 <sup>35</sup>        | UK              | Qualitative interviews                 | COPD and Chronic heart failure                                                            | Not specified                                                   | Thematic analysis            | n.a.                                                        |
| 17 | de Vries, 2013 <sup>36</sup>      | Netherlands     | Survey                                 | Heart failure                                                                             | Blood pressure, weight, heart frequency, ECG                    | Descriptive statistics       | Usage                                                       |
| 18 | Van den Heuvel <sup>38</sup> 2020 | Netherlands     | Survey                                 | Women with pregnancy complications                                                        | Cardiotocography                                                | Descriptive statistics       | Provision of telemonitoring and perspectives of respondents |
| 19 | Gawalko <sup>37</sup> 2021        | Europe          | Survey                                 | Management of atrial fibrillation                                                         | Remote PPG or 1-lead ECG                                        | Descriptive statistics       | Centre experience and patient experience.                   |

n.a. = not available

**Table 3. An overview of factors, classified by the “diffusion process” items of Mendel’s framework**

|                          | #Factors  | #Described | #Barriers | #Enablers | #Both     |
|--------------------------|-----------|------------|-----------|-----------|-----------|
| 1. Norms & Attitudes     | 31        | 51         | 12        | 10        | 9         |
| 2. Structure & Process   | 16        | 33         | 3         | 3         | 10        |
| 3. Resources             | 19        | 75         | 2         | 2         | 15        |
| 4. Policies & Incentives | 10        | 23         | 0         | 1         | 9         |
| 5. Networks & Linkages   | 3         | 8          | 1         | 1         | 1         |
| 6. Media & Change agents | 10        | 12         | 0         | 9         | 1         |
| <b>Total</b>             | <b>89</b> | <b>202</b> | <b>18</b> | <b>26</b> | <b>45</b> |

The number of times factors of influence were described in total; and the number of times factors were described as barrier, enabler or both.

**Table 4. The (expected) intervention outcomes when telemonitoring is implemented.**

| Domain                | Contextual factors             | Detailed description                                                               | Number of publications mentioned |
|-----------------------|--------------------------------|------------------------------------------------------------------------------------|----------------------------------|
| Intervention outcomes | Patient care & health outcomes | (improve) self-care or patient empowerment <sup>21 24 27 28 36 40</sup>            | 6                                |
|                       |                                | (improve) quality of care <sup>21 28 33 36 40</sup>                                | 4                                |
|                       |                                | (improve) patient education <sup>21 28 36</sup>                                    | 3                                |
|                       |                                | (improve) symptoms of disease <sup>28 36</sup>                                     | 2                                |
|                       |                                | (improve) quality of life <sup>24</sup>                                            | 1                                |
|                       | Organisation & System outcomes | Treat more patients (and reduce admission and visits) <sup>21 24 28 33 36 40</sup> | 5                                |
|                       |                                | (reduce) workload <sup>21 28 33 36</sup>                                           | 4                                |
|                       |                                | (reduce) costs <sup>21 24 28</sup>                                                 | 3                                |
|                       |                                | (improve) adherence to guidelines <sup>21 36</sup>                                 | 2                                |
|                       |                                | Contribute to continuity of care <sup>24</sup>                                     | 1                                |

Figure 1 PRISMA flowchart showing the process of including and excluding studies.

**Search syntax:**

("Telemedicine"[Mesh] OR telemedicine[tiab] OR mhealth[tiab] OR m-health[tiab] OR ehealth[tiab] OR e-health[tiab] OR out-of-office[tiab])

AND

("Monitoring, Physiologic"[Mesh] OR "Monitoring, Ambulatory"[Mesh] OR monitor\*[tiab] OR telemonitor\*[tiab] OR health care[tiab] OR healthcare[tiab])

AND

("Implementation Science"[Mesh] OR "Health Plan Implementation"[Mesh])

AND

scale up[tiab] OR implement\*[tiab] OR adoption[tiab])

AND

("Health Policy"[Mesh] OR "Policy Making"[Mesh] OR "National Health Program "[Mesh] OR policy[tiab] OR survey\*[tiab] OR mapping[tiab])

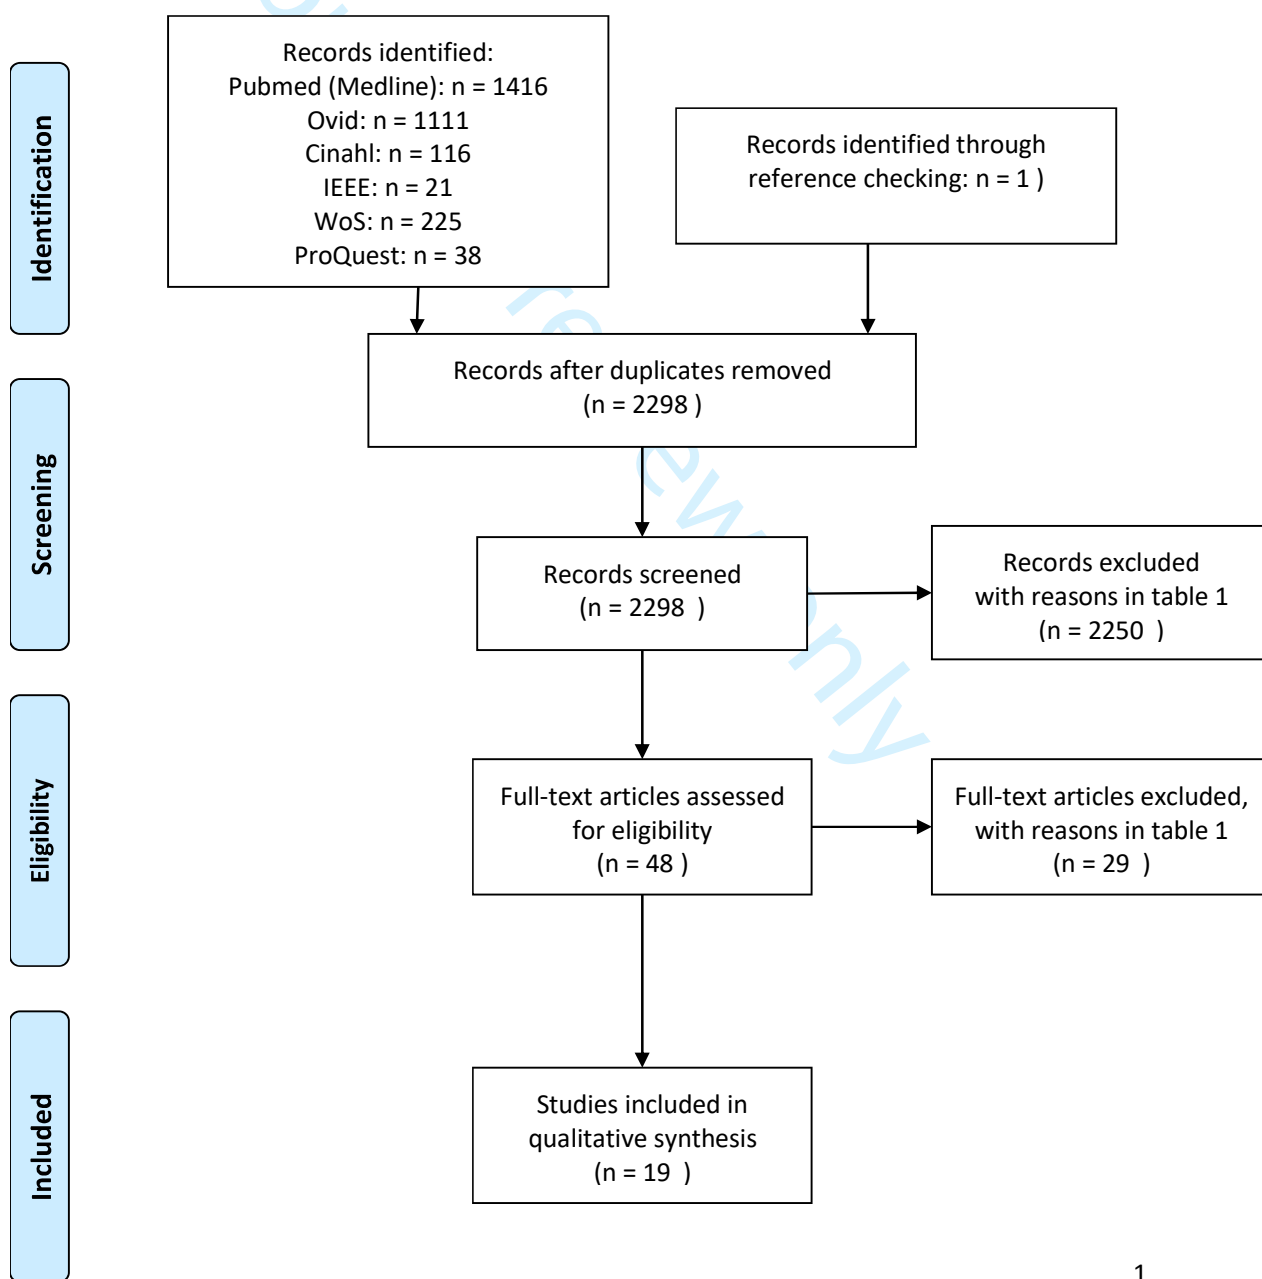

### Number of factors that influence upscaling



Figure 2. The number of enablers, barriers, or both regarding the context of diffusion according to Mendel's framework.



**Supplementary Table 1. Overview of factors – enablers and/or barriers – that influence nationwide upscaling of telemonitoring.**

| Domain                                                                 | Contextual factors | Detailed description                                                                                                                                                                                     | Barrier, Enabler or Both | Number of times mentioned in publications |
|------------------------------------------------------------------------|--------------------|----------------------------------------------------------------------------------------------------------------------------------------------------------------------------------------------------------|--------------------------|-------------------------------------------|
| Context of diffusion                                                   | Norms & Attitudes  | HCP think that patients become too dependent on technology <sup>27 31 39</sup>                                                                                                                           | Barrier                  | 4                                         |
|                                                                        |                    | HCP have scepticism or reservations about TM <sup>28 31 35</sup>                                                                                                                                         | Barrier                  | 3                                         |
|                                                                        |                    | There must be a perceived usefulness and usability of equipment <sup>27 31 39</sup>                                                                                                                      | Both                     | 3                                         |
|                                                                        |                    | TM is convenient for patients <sup>27 31 37</sup>                                                                                                                                                        | Enabler                  | 3                                         |
|                                                                        |                    | HCP have a positive attitude (towards usefulness, feasibility, potential) <sup>29 31 37</sup>                                                                                                            | Enabler                  | 3                                         |
|                                                                        |                    | There is concern amongst HCP that acting on the TM data provided could lead to overtreatment <sup>27 31</sup>                                                                                            | Barrier                  | 2                                         |
|                                                                        |                    | HCP consider use of TM relevant <sup>21 28</sup>                                                                                                                                                         | Enabler                  | 2                                         |
|                                                                        |                    | HCP have high expectations of working with TM <sup>36</sup>                                                                                                                                              | Both                     | 2                                         |
|                                                                        |                    | TM makes patients anxious <sup>27 31</sup>                                                                                                                                                               | Barrier                  | 2                                         |
|                                                                        |                    | HCP think that TM can increase workload and make planning more difficult <sup>35 36</sup>                                                                                                                | Barrier                  | 2                                         |
|                                                                        |                    | Make patients feel more empowered to take a pro-active approach to their health <sup>27</sup> or should be empowered to engage with technologies for selfmanagement and self-care purposes <sup>40</sup> | Enabler                  | 2                                         |
|                                                                        |                    | HCP perceive a shift to technology making medical decisions or support in medical decision making <sup>29 37</sup>                                                                                       | Both                     | 2                                         |
|                                                                        |                    | Although the HCP had high perceptions and expectations of working with TM, these were not positively reflected in the actual experiences. <sup>36</sup>                                                  | Barrier                  | 1                                         |
|                                                                        |                    | HCP expect to manage caseload more efficiently <sup>35</sup>                                                                                                                                             | Enabler                  | 1                                         |
|                                                                        |                    | Change personal practice <sup>27</sup>                                                                                                                                                                   | Both                     | 1                                         |
| Concerns about the impact of telehealth on nursing roles <sup>35</sup> | Barrier            | 1                                                                                                                                                                                                        |                          |                                           |
| HCP experience a lack of advantage <sup>28</sup>                       | Barrier            | 1                                                                                                                                                                                                        |                          |                                           |

|  |                                    |                                                                                                                                                                                                                                                               |         |   |
|--|------------------------------------|---------------------------------------------------------------------------------------------------------------------------------------------------------------------------------------------------------------------------------------------------------------|---------|---|
|  |                                    | HCP who have the knowledge and experience in TM, tend to have a less positive attitude compared with technical professionals, who might be driven by their greater enthusiasm for technology in general. <sup>29</sup>                                        | Both    | 1 |
|  |                                    | HCP think that TM is more expensive than conventional treatment <sup>29</sup>                                                                                                                                                                                 | Barrier | 1 |
|  |                                    | Technical professionals are more confident about patient compliance than HCP <sup>29</sup>                                                                                                                                                                    | Both    | 1 |
|  |                                    | HCP concern about privacy protection <sup>29</sup>                                                                                                                                                                                                            | Barrier | 1 |
|  |                                    | HCP concern about the loss of control over the medical treatment <sup>29</sup>                                                                                                                                                                                | Barrier | 1 |
|  |                                    | HCP think that patient acceptance is a factor of influence <sup>37</sup>                                                                                                                                                                                      | Both    | 1 |
|  |                                    | Use of telehealth is an important new skill for HCP, as was the ability to understand trends in the management of long-term conditions <sup>31</sup>                                                                                                          | Enabler | 1 |
|  |                                    | HCP see TM as an opportunity for professional career development <sup>31</sup>                                                                                                                                                                                | Enabler | 1 |
|  |                                    | HCP consider "Our centre is innovative" <sup>21</sup>                                                                                                                                                                                                         | Enabler | 1 |
|  |                                    | Patients need to accept their old age and health condition, before they use TM <sup>39</sup>                                                                                                                                                                  | Both    | 1 |
|  |                                    | Reducing the level of face-to-face contact with the patients was a concern for professionals, but this concern was not universally shared by patients, some of whom experienced the non-face-to-face contact as additional and efficient input. <sup>27</sup> | Enabler | 1 |
|  |                                    | HCP have concerns about the appropriateness of telehealth for the very severely ill <sup>31</sup>                                                                                                                                                             | Barrier | 1 |
|  |                                    | Early positive experiences and the sharing of success were identified as key enablers for staff acceptance. Early negative experiences of telehealth have a long-lasting impact on staff acceptance and the predominant view among participants <sup>35</sup> | Both    | 1 |
|  |                                    | HCP state that telemonitoring provides higher patient satisfaction (related to home-monitoring) and does not require hospital staff to visit patients at home <sup>38</sup>                                                                                   | Enabler | 1 |
|  | Organisational structure & process | Security and privacy aspects that influence implementation <sup>21 24 28 32 38 40</sup>                                                                                                                                                                       | Both    | 6 |
|  |                                    | Rules and protocols on the implementation of the system and responsibility for incoming data <sup>21 28 35 36 40</sup>                                                                                                                                        | Both    | 5 |
|  |                                    | Certain processes / coordination support implementation of TM <sup>28 32 35 36</sup>                                                                                                                                                                          | Both    | 4 |

1  
2  
3  
4  
5  
6  
7  
8  
9  
10  
11  
12  
13  
14  
15  
16  
17  
18  
19  
20  
21  
22  
23  
24  
25  
26  
27  
28  
29  
30  
31  
32  
33  
34  
35  
36  
37  
38  
39  
40  
41  
42  
43  
44  
45  
46

|  |                                                                                                                                                                                      |         |   |
|--|--------------------------------------------------------------------------------------------------------------------------------------------------------------------------------------|---------|---|
|  | Use of TM enables clinical decision support and influence adoption of guidelines<br><small>24 26 27</small>                                                                          | Enabler | 3 |
|  | Regular data sharing had a motivating effect on patients, as they were aware that at some point the readings may be reviewed <sup>27</sup> or is a possible limitation <sup>40</sup> | Both    | 2 |
|  | A wide program of change management to support healthcare transformation and adoption of new working practices <sup>24 40</sup>                                                      | Both    | 2 |
|  | Reduce admissions or readmissions <sup>21 36</sup>                                                                                                                                   | Enabler | 2 |
|  | Creating central databases making the transmitted data accessible to the treating physician and serving as data registries that benefit medical research <sup>24</sup>               | Enabler | 1 |
|  | Set up appropriate vendor agreements and infrastructure <sup>24</sup>                                                                                                                | Both    | 1 |
|  | Protocols on the acceptable length of time between the moment of incoming patient data and the response of the HCP(response-reaction time) <sup>36</sup>                             | Both    | 1 |
|  | Difficult to obtain relevant data about patients and ensuring that relevant data –                                                                                                   | Barrier | 1 |

|           |                                                                                                                  |         |   |
|-----------|------------------------------------------------------------------------------------------------------------------|---------|---|
|           | limited tailoring to individual patient - is shared with HCP <sup>35</sup>                                       |         |   |
|           | Limited options for discharging patients who will benefit from continued use <sup>35</sup>                       | Barrier | 1 |
|           | Referral routes should be opened up for patients with other conditions and with less complex needs <sup>35</sup> | Both    | 1 |
|           | A changing environment is a barrier <sup>35</sup>                                                                | Barrier | 1 |
|           | The introduction (the way of communication, red.) to frontline staff influences implementation <sup>35</sup>     | Both    | 1 |
|           | Organisational size influences implementation of TM <sup>25</sup>                                                | Both    | 1 |
| Resources | Costs / financing of TM <sup>21 24-26 28 35-38</sup>                                                             | Both    | 9 |
|           | Knowledge of HCP / training of frontline staff <sup>21 24 28 32 35-37 40</sup>                                   | Both    | 8 |
|           | Reimbursement as an element of financial resources <sup>21 24 26 28 33 37 38 40</sup>                            | Both    | 8 |
|           | The TM-system access to the EMR / interfacing of technologies <sup>24 26 27 32 35 37</sup>                       | Both    | 6 |
|           | Design of telemonitoring system / usability <sup>26 27 32 37 39 40</sup>                                         | Both    | 6 |
|           | Availability of equipment <sup>21 28 35 37</sup>                                                                 | Both    | 5 |
|           | Sufficient staffing <sup>26 28 32 37 40</sup>                                                                    | Both    | 5 |

|                       |                                                                                                                                            |         |   |
|-----------------------|--------------------------------------------------------------------------------------------------------------------------------------------|---------|---|
|                       | Time for implementation TM <sup>27 32 35</sup>                                                                                             | Both    | 5 |
|                       | Lack of evidence for TM <sup>21 24 26 40</sup>                                                                                             | Both    | 4 |
|                       | Engage stakeholders in system design <sup>32 35 40</sup>                                                                                   | Both    | 4 |
|                       | (Lack of)Cloud acces, internet access or cellular access <sup>28 32 37</sup>                                                               | Both    | 3 |
|                       | Organisational readiness <sup>25 33</sup>                                                                                                  | Both    | 2 |
|                       | Significant income disparities which impact the ability to enforce guidelines and advance adoption of TM <sup>24</sup>                     | Barrier | 2 |
|                       | An externally resourced system for installation, technical support, maintenance and de-installation <sup>35 37</sup>                       | Both    | 2 |
|                       | Local "champions" <sup>35</sup>                                                                                                            | Both    | 1 |
|                       | Top management support <sup>25 40</sup>                                                                                                    | Both    | 1 |
|                       | Staff to assume monitoring and management responsibilities for patients outside the hospital <sup>26</sup>                                 | Both    | 1 |
|                       | On-boarding process to a TM project. <sup>37</sup>                                                                                         | Both    | 1 |
|                       | (Patient)education to address concerns regarding the use of remote monitoring , specifically for older adults, as an enabler <sup>40</sup> | Enabler | 1 |
|                       | Assessment of added value should be calculated <sup>38</sup>                                                                               | Enabler | 1 |
| Policies & Incentives | Addressing security, social and ethical issues to enable implementation of TM <sup>24 28 32 37 38</sup>                                    | Both    | 5 |
|                       | A (lack of) vision of an organisation on implementing TM <sup>21 28 35</sup>                                                               | Both    | 3 |
|                       | Worldwide, European and statelevel policies and legal and regulatory frameworks <sup>24 26 40</sup>                                        | Both    | 3 |
|                       | New or adjusted workflows, care paths or data management <sup>24 27 37</sup>                                                               | Both    | 3 |
|                       | Consensus statements and national guidelines <sup>22 24</sup>                                                                              | Both    | 2 |
|                       | Reimbursement or alternative payment models as a financial incentive for organisations <sup>24 26</sup>                                    | Both    | 2 |
|                       | Target patients, volume of population, data load and work intensity within organisations <sup>28 35 37</sup>                               | Both    | 3 |
|                       | Interoperability standards crucial to the success of scaling remote patient monitoring programs <sup>32</sup>                              | Both    | 1 |

|  |                                                                                                                                                                                      |                                                                                                                                                                          |         |   |
|--|--------------------------------------------------------------------------------------------------------------------------------------------------------------------------------------|--------------------------------------------------------------------------------------------------------------------------------------------------------------------------|---------|---|
|  |                                                                                                                                                                                      | Policy and practice developments affecting health care services <sup>35</sup>                                                                                            | Both    | 1 |
|  |                                                                                                                                                                                      | Importance of TM for health authorities <sup>21</sup>                                                                                                                    | Enabler | 1 |
|  | Networks & Linkages                                                                                                                                                                  | Collaboration non-profit or public-private organisations <sup>22 24 26 35 40</sup>                                                                                       | Both    | 5 |
|  |                                                                                                                                                                                      | Not being able to collaborate with other hospitals or clinics and primary care providers <sup>28 32</sup>                                                                | Barrier | 2 |
|  |                                                                                                                                                                                      | Professional organisations in collaboration with national societies can play an important role in catalysing reimbursement and adoption <sup>24</sup>                    | Enabler | 1 |
|  | Media & Change Agents                                                                                                                                                                | Advocates, early adopters and local champions enable implementation of TM <sup>24 35</sup>                                                                               | Enabler | 2 |
|  |                                                                                                                                                                                      | Create (and increase) awareness in the general clinical community of the potential that remote monitoring has <sup>37 40</sup>                                           | Enabler | 2 |
|  |                                                                                                                                                                                      | A standardized initiation video call to inform and instruct each participating centre <sup>37</sup>                                                                      | Enabler | 1 |
|  |                                                                                                                                                                                      | (Lack of) guidelines from health care authorities <sup>21</sup>                                                                                                          | Both    | 1 |
|  |                                                                                                                                                                                      | Device manufacturer that invest in TM <sup>24</sup>                                                                                                                      | Enabler | 1 |
|  |                                                                                                                                                                                      | The dynamics [P] in the COVID-19 pandemic may have impacted the use of TM <sup>37</sup>                                                                                  | Enabler | 1 |
|  |                                                                                                                                                                                      | Consensus on the implementation and research agenda can pave the road to the widespread use of digital health services <sup>38</sup>                                     | Enabler | 1 |
|  |                                                                                                                                                                                      | A national repository could act as the first port of call where policy makers, clinicians and users could access information on remote monitoring projects <sup>40</sup> | Enabler | 1 |
|  |                                                                                                                                                                                      | Information about strategies to educate and empower patients were provided <sup>37</sup>                                                                                 | Enabler | 1 |
|  | Professional societies can review and potentially endorse TM applications that offer valuable decision support and empower the physician's relationship to the patient <sup>24</sup> | Enabler                                                                                                                                                                  | 1       |   |

HCP= Health Care Professional, TM= Telemonitoring

**Appendix 1. Preliminary search**

| Database               | Search syntax                                                                                                                                                                                                                                                                                                                                        | Results                                                                               |
|------------------------|------------------------------------------------------------------------------------------------------------------------------------------------------------------------------------------------------------------------------------------------------------------------------------------------------------------------------------------------------|---------------------------------------------------------------------------------------|
| Pubmed                 | ("Telemedicine"[Mesh] OR telemedicine[tiab] OR mhealth[tiab] OR m-health[tiab] OR ehealth[tiab] OR e-health[tiab]) AND ("Monitoring, Physiologic"[Mesh] OR "Monitoring, Ambulatory"[Mesh] OR telemonitor*[tiab]) AND ("Implementation Science"[Mesh] OR "Health Plan Implementation"[Mesh] AND scale up[tiab] OR implement*[tiab] OR adoption[tiab]) | 723 of which 156 meta-analysis or reviews. None relevant for upscaling telemonitoring |
| JBI Evidence Synthesis | Telemonitoring AND Implementation                                                                                                                                                                                                                                                                                                                    | 14 results, none relevant.                                                            |
| Open Science framework | Telemonitoring OR telemedicine                                                                                                                                                                                                                                                                                                                       | 29 registries, none about upscaling                                                   |
| Prospero database      | (telemonitoring [all fields] OR telemedicine [MeSH]) AND Implementation Science [MeSH] OR Regional Health Planning [MeSH] OR Health Plan Implementation [MeSH] OR Implementation [all fields]                                                                                                                                                        | 102 results, none relevant for upscaling telemonitoring.                              |

## Appendix 2. Search syntax

### Search syntax:

("Telemedicine"[Mesh] OR telemedicine[tiab] OR mhealth[tiab] OR m-health[tiab] OR ehealth[tiab] OR e-health[tiab] OR out-of-office[tiab])

AND

("Monitoring, Physiologic"[Mesh] OR "Monitoring, Ambulatory"[Mesh] OR monitor\*[tiab] OR telemonitor\*[tiab] OR health care[tiab] OR healthcare[tiab])

AND

("Implementation Science"[Mesh] OR "Health Plan Implementation"[Mesh])

AND

scale up[tiab] OR implement\*[tiab] OR adoption[tiab])

AND

("Health Policy"[Mesh] OR "Policy Making"[Mesh] OR "National Health Program "[Mesh] OR policy[tiab] OR survey\*[tiab] OR mapping[tiab])

**Appendix 3**

Framework of dissemination in health services intervention research. From: Mendel et al 2008, *Adm Policy Ment Health* (2008) 35:21–37. The red lined box indicates the focus in this scoping review.





## Preferred Reporting Items for Systematic reviews and Meta-Analyses extension for Scoping Reviews (PRISMA-ScR) Checklist

| SECTION                                               | ITEM | PRISMA-ScR CHECKLIST ITEM                                                                                                                                                                                                                                                                                  | REPORTED ON PAGE #        |
|-------------------------------------------------------|------|------------------------------------------------------------------------------------------------------------------------------------------------------------------------------------------------------------------------------------------------------------------------------------------------------------|---------------------------|
| <b>TITLE</b>                                          |      |                                                                                                                                                                                                                                                                                                            |                           |
| Title                                                 | 1    | Identify the report as a scoping review.                                                                                                                                                                                                                                                                   | 1                         |
| <b>ABSTRACT</b>                                       |      |                                                                                                                                                                                                                                                                                                            |                           |
| Structured summary                                    | 2    | Provide a structured summary that includes (as applicable): background, objectives, eligibility criteria, sources of evidence, charting methods, results, and conclusions that relate to the review questions and objectives.                                                                              | 2                         |
| <b>INTRODUCTION</b>                                   |      |                                                                                                                                                                                                                                                                                                            |                           |
| Rationale                                             | 3    | Describe the rationale for the review in the context of what is already known. Explain why the review questions/objectives lend themselves to a scoping review approach.                                                                                                                                   | 4                         |
| Objectives                                            | 4    | Provide an explicit statement of the questions and objectives being addressed with reference to their key elements (e.g., population or participants, concepts, and context) or other relevant key elements used to conceptualize the review questions and/or objectives.                                  | 4                         |
| <b>METHODS</b>                                        |      |                                                                                                                                                                                                                                                                                                            |                           |
| Protocol and registration                             | 5    | Indicate whether a review protocol exists; state if and where it can be accessed (e.g., a Web address); and if available, provide registration information, including the registration number.                                                                                                             | 5                         |
| Eligibility criteria                                  | 6    | Specify characteristics of the sources of evidence used as eligibility criteria (e.g., years considered, language, and publication status), and provide a rationale.                                                                                                                                       | 5                         |
| Information sources*                                  | 7    | Describe all information sources in the search (e.g., databases with dates of coverage and contact with authors to identify additional sources), as well as the date the most recent search was executed.                                                                                                  | 5                         |
| Search                                                | 8    | Present the full electronic search strategy for at least 1 database, including any limits used, such that it could be repeated.                                                                                                                                                                            | Appendix 1 and appendix 2 |
| Selection of sources of evidence†                     | 9    | State the process for selecting sources of evidence (i.e., screening and eligibility) included in the scoping review.                                                                                                                                                                                      | 6                         |
| Data charting process‡                                | 10   | Describe the methods of charting data from the included sources of evidence (e.g., calibrated forms or forms that have been tested by the team before their use, and whether data charting was done independently or in duplicate) and any processes for obtaining and confirming data from investigators. | 6                         |
| Data items                                            | 11   | List and define all variables for which data were sought and any assumptions and simplifications made.                                                                                                                                                                                                     | 6                         |
| Critical appraisal of individual sources of evidence§ | 12   | If done, provide a rationale for conducting a critical appraisal of included sources of evidence; describe the methods used and how this information was used in any data synthesis (if appropriate).                                                                                                      | N/A                       |
| Synthesis of results                                  | 13   | Describe the methods of handling and summarizing the data that were charted.                                                                                                                                                                                                                               | 6                         |

| SECTION                                       | ITEM | PRISMA-ScR CHECKLIST ITEM                                                                                                                                                                       | REPORTED ON PAGE #                          |
|-----------------------------------------------|------|-------------------------------------------------------------------------------------------------------------------------------------------------------------------------------------------------|---------------------------------------------|
| <b>RESULTS</b>                                |      |                                                                                                                                                                                                 |                                             |
| Selection of sources of evidence              | 14   | Give numbers of sources of evidence screened, assessed for eligibility, and included in the review, with reasons for exclusions at each stage, ideally using a flow diagram.                    | Page 7, figure 1 and table 1.               |
| Characteristics of sources of evidence        | 15   | For each source of evidence, present characteristics for which data were charted and provide the citations.                                                                                     | Page 7 and table 2                          |
| Critical appraisal within sources of evidence | 16   | If done, present data on critical appraisal of included sources of evidence (see item 12).                                                                                                      | N/A                                         |
| Results of individual sources of evidence     | 17   | For each included source of evidence, present the relevant data that were charted that relate to the review questions and objectives.                                                           | Page 7 and 9, table 2, table 3 and table 4. |
| Synthesis of results                          | 18   | Summarize and/or present the charting results as they relate to the review questions and objectives.                                                                                            | Page 9, 10 and 11                           |
| <b>DISCUSSION</b>                             |      |                                                                                                                                                                                                 |                                             |
| Summary of evidence                           | 19   | Summarize the main results (including an overview of concepts, themes, and types of evidence available), link to the review questions and objectives, and consider the relevance to key groups. | 12, 13                                      |
| Limitations                                   | 20   | Discuss the limitations of the scoping review process.                                                                                                                                          | 14                                          |
| Conclusions                                   | 21   | Provide a general interpretation of the results with respect to the review questions and objectives, as well as potential implications and/or next steps.                                       | 14                                          |
| <b>FUNDING</b>                                |      |                                                                                                                                                                                                 |                                             |
| Funding                                       | 22   | Describe sources of funding for the included sources of evidence, as well as sources of funding for the scoping review. Describe the role of the funders of the scoping review.                 | 15                                          |

JB1 = Joanna Briggs Institute; PRISMA-ScR = Preferred Reporting Items for Systematic reviews and Meta-Analyses extension for Scoping Reviews.

\* Where *sources of evidence* (see second footnote) are compiled from, such as bibliographic databases, social media platforms, and Web sites.

† A more inclusive/heterogeneous term used to account for the different types of evidence or data sources (e.g., quantitative and/or qualitative research, expert opinion, and policy documents) that may be eligible in a scoping review as opposed to only studies. This is not to be confused with *information sources* (see first footnote).

‡ The frameworks by Arksey and O'Malley (6) and Levac and colleagues (7) and the JBI guidance (4, 5) refer to the process of data extraction in a scoping review as data charting.

§ The process of systematically examining research evidence to assess its validity, results, and relevance before using it to inform a decision. This term is used for items 12 and 19 instead of "risk of bias" (which is more applicable to systematic reviews of interventions) to include and acknowledge the various sources of evidence that may be used in a scoping review (e.g., quantitative and/or qualitative research, expert opinion, and policy document).

From: Tricco AC, Lillie E, Zarin W, O'Brien KK, Colquhoun H, Levac D, et al. PRISMA Extension for Scoping Reviews (PRISMA-ScR): Checklist and Explanation. *Ann Intern Med.* 2018;169:467–473. doi: 10.7326/M18-0850.
