# Supplementary material for: Enablers and barriers in upscaling telemonitoring across geographic boundaries: a scoping review
Source: PubMed Central journal article supplement — BMJ Open. 2022 Apr 19;12(4):e057494. doi: 10.1136/bmjopen-2021-057494 (PMC9021767; doi:10.1136/bmjopen-2021-057494), 2022-04-19
Supplement: bmjopen-2021-057494supp001.pdf [file bmjopen-2021-057494supp001.pdf]

**Appendix 1. Preliminary search**

| Database               | Search syntax                                                                                                                                                                                                                                                                                                                                        | Results                                                                               |
|------------------------|------------------------------------------------------------------------------------------------------------------------------------------------------------------------------------------------------------------------------------------------------------------------------------------------------------------------------------------------------|---------------------------------------------------------------------------------------|
| Pubmed                 | ("Telemedicine"[Mesh] OR telemedicine[tiab] OR mhealth[tiab] OR m-health[tiab] OR ehealth[tiab] OR e-health[tiab]) AND ("Monitoring, Physiologic"[Mesh] OR "Monitoring, Ambulatory"[Mesh] OR telemonitor*[tiab]) AND ("Implementation Science"[Mesh] OR "Health Plan Implementation"[Mesh] AND scale up[tiab] OR implement*[tiab] OR adoption[tiab]) | 723 of which 156 meta-analysis or reviews. None relevant for upscaling telemonitoring |
| JBI Evidence Synthesis | Telemonitoring AND Implementation                                                                                                                                                                                                                                                                                                                    | 14 results, none relevant.                                                            |
| Open Science framework | Telemonitoring OR telemedicine                                                                                                                                                                                                                                                                                                                       | 29 registries, none about upscaling                                                   |
| Prospero database      | (telemonitoring [all fields] OR telemedicine [MeSH]) AND Implementation Science [MeSH] OR Regional Health Planning [MeSH] OR Health Plan Implementation [MeSH] OR Implementation [all fields]                                                                                                                                                        | 102 results, none relevant for upscaling telemonitoring.                              |
