# Supplementary material for: Enablers and barriers in upscaling telemonitoring across geographic boundaries: a scoping review
Source: PubMed Central journal article supplement — BMJ Open. 2022 Apr 19;12(4):e057494. doi: 10.1136/bmjopen-2021-057494 (PMC9021767; doi:10.1136/bmjopen-2021-057494), 2022-04-19
Supplement: bmjopen-2021-057494supp002.pdf [file bmjopen-2021-057494supp002.pdf]

## Appendix 2. Search syntax

### Search syntax:

("Telemedicine"[Mesh] OR telemedicine[tiab] OR mhealth[tiab] OR m-health[tiab] OR ehealth[tiab] OR e-health[tiab] OR out-of-office[tiab])

AND

("Monitoring, Physiologic"[Mesh] OR "Monitoring, Ambulatory"[Mesh] OR monitor\*[tiab] OR telemonitor\*[tiab] OR health care[tiab] OR healthcare[tiab])

AND

("Implementation Science"[Mesh] OR "Health Plan Implementation"[Mesh])

AND

scale up[tiab] OR implement\*[tiab] OR adoption[tiab])

AND

("Health Policy"[Mesh] OR "Policy Making"[Mesh] OR "National Health Program "[Mesh] OR policy[tiab] OR survey\*[tiab] OR mapping[tiab])
