# Supplementary material for: Enablers and barriers in upscaling telemonitoring across geographic boundaries: a scoping review
Source: PubMed Central journal article supplement — BMJ Open. 2022 Apr 19;12(4):e057494. doi: 10.1136/bmjopen-2021-057494 (PMC9021767; doi:10.1136/bmjopen-2021-057494), 2022-04-19

### Appendix 3

Framework of dissemination in health services intervention research. From: Mendel et al 2008, *Adm Policy Ment Health* (2008) 35:21–37. The red lined box indicates the focus in this scoping review.

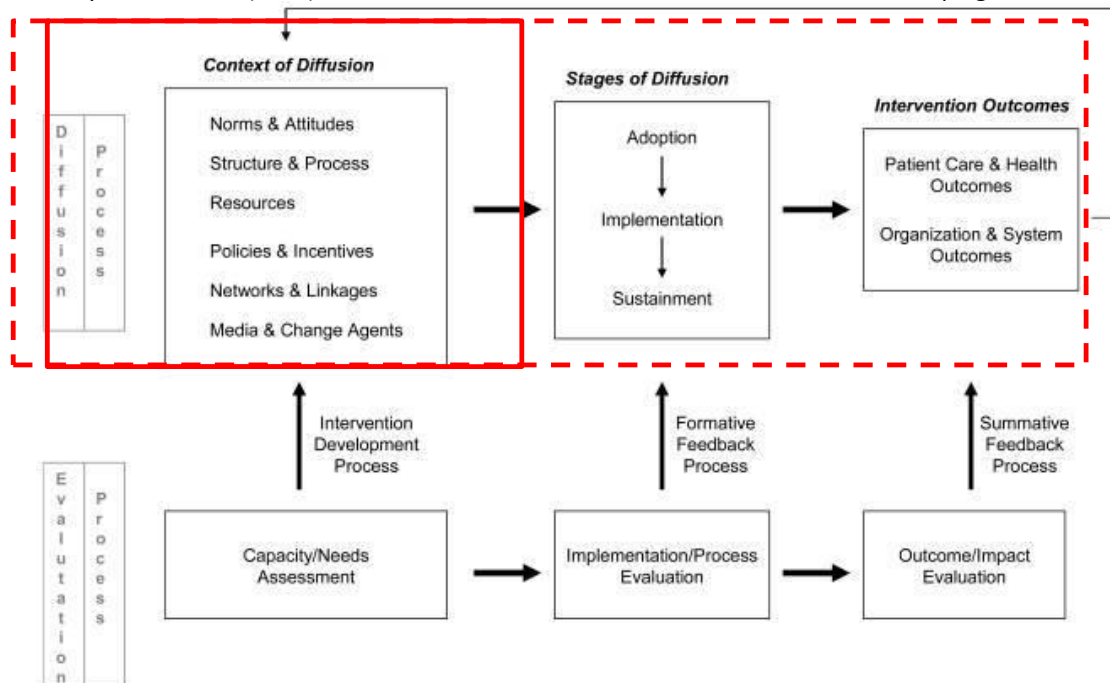

Supplement: bmjopen-2021-057494supp003.pdf [file bmjopen-2021-057494supp003.pdf]
