# Supplementary material for: Enablers and barriers in upscaling telemonitoring across geographic boundaries: a scoping review
Source: PubMed Central journal article supplement — BMJ Open. 2022 Apr 19;12(4):e057494. doi: 10.1136/bmjopen-2021-057494 (PMC9021767; doi:10.1136/bmjopen-2021-057494), 2022-04-19
Supplement: bmjopen-2021-057494supp004.pdf [file bmjopen-2021-057494supp004.pdf]

**Supplementary Table 1. Overview of factors – enablers and/or barriers – that influence nationwide upscaling of telemonitoring.**

| Domain                                                                 | Contextual factors | Detailed description                                                                                                                                                                                     | Barrier, Enabler or Both | Number of times mentioned in publications |
|------------------------------------------------------------------------|--------------------|----------------------------------------------------------------------------------------------------------------------------------------------------------------------------------------------------------|--------------------------|-------------------------------------------|
| Context of diffusion                                                   | Norms & Attitudes  | HCP think that patients become too dependent on technology <sup>27 31 39</sup>                                                                                                                           | Barrier                  | 4                                         |
|                                                                        |                    | HCP have scepticism or reservations about TM <sup>28 31 35</sup>                                                                                                                                         | Barrier                  | 3                                         |
|                                                                        |                    | There must be a perceived usefulness and usability of equipment <sup>27 31 39</sup>                                                                                                                      | Both                     | 3                                         |
|                                                                        |                    | TM is convenient for patients <sup>27 31 37</sup>                                                                                                                                                        | Enabler                  | 3                                         |
|                                                                        |                    | HCP have a positive attitude (towards usefulness, feasibility, potential) <sup>29 31 37</sup>                                                                                                            | Enabler                  | 3                                         |
|                                                                        |                    | There is concern amongst HCP that acting on the TM data provided could lead to overtreatment <sup>27 31</sup>                                                                                            | Barrier                  | 2                                         |
|                                                                        |                    | HCP consider use of TM relevant <sup>21 28</sup>                                                                                                                                                         | Enabler                  | 2                                         |
|                                                                        |                    | HCP have high expectations of working with TM <sup>36</sup>                                                                                                                                              | Both                     | 2                                         |
|                                                                        |                    | TM makes patients anxious <sup>27 31</sup>                                                                                                                                                               | Barrier                  | 2                                         |
|                                                                        |                    | HCP think that TM can increase workload and make planning more difficult <sup>35 36</sup>                                                                                                                | Barrier                  | 2                                         |
|                                                                        |                    | Make patients feel more empowered to take a pro-active approach to their health <sup>27</sup> or should be empowered to engage with technologies for selfmanagement and self-care purposes <sup>40</sup> | Enabler                  | 2                                         |
|                                                                        |                    | HCP perceive a shift to technology making medical decisions or support in medical decision making <sup>29 37</sup>                                                                                       | Both                     | 2                                         |
|                                                                        |                    | Although the HCP had high perceptions and expectations of working with TM, these were not positively reflected in the actual experiences. <sup>36</sup>                                                  | Barrier                  | 1                                         |
|                                                                        |                    | HCP expect to manage caseload more efficiently <sup>35</sup>                                                                                                                                             | Enabler                  | 1                                         |
|                                                                        |                    | Change personal practice <sup>27</sup>                                                                                                                                                                   | Both                     | 1                                         |
| Concerns about the impact of telehealth on nursing roles <sup>35</sup> | Barrier            | 1                                                                                                                                                                                                        |                          |                                           |
| HCP experience a lack of advantage <sup>28</sup>                       | Barrier            | 1                                                                                                                                                                                                        |                          |                                           |

|  |                                    |                                                                                                                                                                                                                                                               |         |   |
|--|------------------------------------|---------------------------------------------------------------------------------------------------------------------------------------------------------------------------------------------------------------------------------------------------------------|---------|---|
|  |                                    | HCP who have the knowledge and experience in TM, tend to have a less positive attitude compared with technical professionals, who might be driven by their greater enthusiasm for technology in general. <sup>29</sup>                                        | Both    | 1 |
|  |                                    | HCP think that TM is more expensive than conventional treatment <sup>29</sup>                                                                                                                                                                                 | Barrier | 1 |
|  |                                    | Technical professionals are more confident about patient compliance than HCP <sup>29</sup>                                                                                                                                                                    | Both    | 1 |
|  |                                    | HCP concern about privacy protection <sup>29</sup>                                                                                                                                                                                                            | Barrier | 1 |
|  |                                    | HCP concern about the loss of control over the medical treatment <sup>29</sup>                                                                                                                                                                                | Barrier | 1 |
|  |                                    | HCP think that patient acceptance is a factor of influence <sup>37</sup>                                                                                                                                                                                      | Both    | 1 |
|  |                                    | Use of telehealth is an important new skill for HCP, as was the ability to understand trends in the management of long-term conditions <sup>31</sup>                                                                                                          | Enabler | 1 |
|  |                                    | HCP see TM as an opportunity for professional career development <sup>31</sup>                                                                                                                                                                                | Enabler | 1 |
|  |                                    | HCP consider "Our centre is innovative" <sup>21</sup>                                                                                                                                                                                                         | Enabler | 1 |
|  |                                    | Patients need to accept their old age and health condition, before they use TM <sup>39</sup>                                                                                                                                                                  | Both    | 1 |
|  |                                    | Reducing the level of face-to-face contact with the patients was a concern for professionals, but this concern was not universally shared by patients, some of whom experienced the non-face-to-face contact as additional and efficient input. <sup>27</sup> | Enabler | 1 |
|  |                                    | HCP have concerns about the appropriateness of telehealth for the very severely ill <sup>31</sup>                                                                                                                                                             | Barrier | 1 |
|  |                                    | Early positive experiences and the sharing of success were identified as key enablers for staff acceptance. Early negative experiences of telehealth have a long-lasting impact on staff acceptance and the predominant view among participants <sup>35</sup> | Both    | 1 |
|  |                                    | HCP state that telemonitoring provides higher patient satisfaction (related to home-monitoring) and does not require hospital staff to visit patients at home <sup>38</sup>                                                                                   | Enabler | 1 |
|  | Organisational structure & process | Security and privacy aspects that influence implementation <sup>21 24 28 32 38 40</sup>                                                                                                                                                                       | Both    | 6 |
|  |                                    | Rules and protocols on the implementation of the system and responsibility for incoming data <sup>21 28 35 36 40</sup>                                                                                                                                        | Both    | 5 |
|  |                                    | Certain processes / coordination support implementation of TM <sup>28 32 35 36</sup>                                                                                                                                                                          | Both    | 4 |

|  |  |                                                                                                                                                                                      |         |   |
|--|--|--------------------------------------------------------------------------------------------------------------------------------------------------------------------------------------|---------|---|
|  |  | Use of TM enables clinical decision support and influence adoption of guidelines<br><sup>24 26 27</sup>                                                                              | Enabler | 3 |
|  |  | Regular data sharing had a motivating effect on patients, as they were aware that at some point the readings may be reviewed <sup>27</sup> or is a possible limitation <sup>40</sup> | Both    | 2 |
|  |  | A wide program of change management to support healthcare transformation and adoption of new working practices <sup>24 40</sup>                                                      | Both    | 2 |
|  |  | Reduce admissions or readmissions <sup>21 36</sup>                                                                                                                                   | Enabler | 2 |
|  |  | Creating central databases making the transmitted data accessible to the treating physician and serving as data registries that benefit medical research <sup>24</sup>               | Enabler | 1 |
|  |  | Set up appropriate vendor agreements and infrastructure <sup>24</sup>                                                                                                                | Both    | 1 |
|  |  | Protocols on the acceptable length of time between the moment of incoming patient data and the response of the HCP(response-reaction time) <sup>36</sup>                             | Both    | 1 |
|  |  | Difficult to obtain relevant data about patients and ensuring that relevant data –                                                                                                   | Barrier | 1 |

|  |           |                                                                                                                  |         |   |
|--|-----------|------------------------------------------------------------------------------------------------------------------|---------|---|
|  |           | limited tailoring to individual patient - is shared with HCP <sup>35</sup>                                       |         |   |
|  |           | Limited options for discharging patients who will benefit from continued use <sup>35</sup>                       | Barrier | 1 |
|  |           | Referral routes should be opened up for patients with other conditions and with less complex needs <sup>35</sup> | Both    | 1 |
|  |           | A changing environment is a barrier <sup>35</sup>                                                                | Barrier | 1 |
|  |           | The introduction (the way of communication, red.) to frontline staff influences implementation <sup>35</sup>     | Both    | 1 |
|  |           | Organisational size influences implementation of TM <sup>25</sup>                                                | Both    | 1 |
|  | Resources | Costs / financing of TM <sup>21 24-26 28 35-38</sup>                                                             | Both    | 9 |
|  |           | Knowledge of HCP / training of frontline staff <sup>21 24 28 32 35-37 40</sup>                                   | Both    | 8 |
|  |           | Reimbursement as an element of financial resources <sup>21 24 26 28 33 37 38 40</sup>                            | Both    | 8 |
|  |           | The TM-system access to the EMR / interfacing of technologies <sup>24 26 27 32 35 37</sup>                       | Both    | 6 |
|  |           | Design of telemonitoring system / usability <sup>26 27 32 37 39 40</sup>                                         | Both    | 6 |
|  |           | Availability of equipment <sup>21 28 35 37</sup>                                                                 | Both    | 5 |
|  |           | Sufficient staffing <sup>26 28 32 37 40</sup>                                                                    | Both    | 5 |

|  |                       |                                                                                                                                            |         |   |
|--|-----------------------|--------------------------------------------------------------------------------------------------------------------------------------------|---------|---|
|  |                       | Time for implementation TM <sup>27 32 35</sup>                                                                                             | Both    | 5 |
|  |                       | Lack of evidence for TM <sup>21 24 26 40</sup>                                                                                             | Both    | 4 |
|  |                       | Engage stakeholders in system design <sup>32 35 40</sup>                                                                                   | Both    | 4 |
|  |                       | (Lack of)Cloud acces, internet access or cellular access <sup>28 32 37</sup>                                                               | Both    | 3 |
|  |                       | Organisational readiness <sup>25 33</sup>                                                                                                  | Both    | 2 |
|  |                       | Significant income disparities which impact the ability to enforce guidelines and advance adoption of TM <sup>24</sup>                     | Barrier | 2 |
|  |                       | An externally resourced system for installation, technical support, maintenance and de-installation <sup>35 37</sup>                       | Both    | 2 |
|  |                       | Local "champions" <sup>35</sup>                                                                                                            | Both    | 1 |
|  |                       | Top management support <sup>25 40</sup>                                                                                                    | Both    | 1 |
|  |                       | Staff to assume monitoring and management responsibilities for patients outside the hospital <sup>26</sup>                                 | Both    | 1 |
|  |                       | On-boarding process to a TM project. <sup>37</sup>                                                                                         | Both    | 1 |
|  |                       | (Patient)education to address concerns regarding the use of remote monitoring , specifically for older adults, as an enabler <sup>40</sup> | Enabler | 1 |
|  |                       | Assessment of added value should be calculated <sup>38</sup>                                                                               | Enabler | 1 |
|  | Policies & Incentives | Addressing security, social and ethical issues to enable implementation of TM <sup>24 28 32 37 38</sup>                                    | Both    | 5 |
|  |                       | A (lack of) vision of an organisation on implementing TM <sup>21 28 35</sup>                                                               | Both    | 3 |
|  |                       | Worldwide, European and statelevel policies and legal and regulatory frameworks <sup>24 26 40</sup>                                        | Both    | 3 |
|  |                       | New or adjusted workflows, care paths or data management <sup>24 27 37</sup>                                                               | Both    | 3 |
|  |                       | Consensus statements and national guidelines <sup>22 24</sup>                                                                              | Both    | 2 |
|  |                       | Reimbursement or alternative payment models as a financial incentive for organisations <sup>24 26</sup>                                    | Both    | 2 |
|  |                       | Target patients, volume of population, data load and work intensity within organisations <sup>28 35 37</sup>                               | Both    | 3 |
|  |                       | Interoperability standards crucial to the success of scaling remote patient monitoring programs <sup>32</sup>                              | Both    | 1 |

|                       |                                                                                                                                                                                      |         |   |
|-----------------------|--------------------------------------------------------------------------------------------------------------------------------------------------------------------------------------|---------|---|
|                       | Policy and practice developments affecting health care services <sup>35</sup>                                                                                                        | Both    | 1 |
|                       | Importance of TM for health authorities <sup>21</sup>                                                                                                                                | Enabler | 1 |
| Networks & Linkages   | Collaboration non-profit or public-private organisations <sup>22 24 26 35 40</sup>                                                                                                   | Both    | 5 |
|                       | Not being able to collaborate with other hospitals or clinics and primary care providers <sup>28 32</sup>                                                                            | Barrier | 2 |
|                       | Professional organisations in collaboration with national societies can play an important role in catalysing reimbursement and adoption <sup>24</sup>                                | Enabler | 1 |
| Media & Change Agents | Advocates, early adopters and local champions enable implementation of TM <sup>24 35</sup>                                                                                           | Enabler | 2 |
|                       | Create (and increase) awareness in the general clinical community of the potential that remote monitoring has <sup>37 40</sup>                                                       | Enabler | 2 |
|                       | A standardized initiation video call to inform and instruct each participating centre <sup>37</sup>                                                                                  | Enabler | 1 |
|                       | (Lack of) guidelines from health care authorities <sup>21</sup>                                                                                                                      | Both    | 1 |
|                       | Device manufacturer that invest in TM <sup>24</sup>                                                                                                                                  | Enabler | 1 |
|                       | The dynamics [SEP] in the COVID-19 pandemic may have impacted the use of TM <sup>37</sup>                                                                                            | Enabler | 1 |
|                       | Consensus on the implementation and research agenda can pave the road to the widespread use of digital health services <sup>38</sup>                                                 | Enabler | 1 |
|                       | A national repository could act as the first port of call where policy makers, clinicians and users could access information on remote monitoring projects <sup>40</sup>             | Enabler | 1 |
|                       | Information about strategies to educate and empower patients were provided <sup>37</sup>                                                                                             | Enabler | 1 |
|                       | Professional societies can review and potentially endorse TM applications that offer valuable decision support and empower the physician's relationship to the patient <sup>24</sup> | Enabler | 1 |

HCP= Health Care Professional, TM= Telemonitoring
